# Supplementary material
Source: publisher figshare collection journal article supplement (https://diabetesjournals.figshare.com/articles/dataset/_/22009409)
Supplement: Supplementary file 1 [file 1]

## NOTES

(First sheet of the Supplemental Excel spreadsheet)

---

### SUPPLEMENTAL TABLE 1: Baseline clinical and lifestyle characteristics of the analytical cohorts

AIRG: Acute Insulin Response to glucose; eGFR, estimated glomerular filtration rate.

\*Comprises race self-reported as ‘White’, ‘American Indian/Alaskan Native’, ‘Asian/Pacific Islander’ or ‘Other.’

†Calculated using serum creatinine and cystatin.

‡Values expressed as median (Q1 – Q3). All other values expressed as mean (SD) or N (%).

---

### SUPPLEMENTAL TABLE 2: Plasma proteins associated with incident type 2 diabetes in the CHS cohort

\*Model adjusted for age, gender, race, clinic site, and estimated glomerular filtration rate

†Model adjusted for age, gender, race, clinic site, estimated glomerular filtration rate, BMI, smoking status, alcohol consumption status, and education

HR: Hazard ratio; presents change in risk per standard deviation increase in log<sub>2</sub> protein unit at baseline

‡ Spearman rho (ρ) coefficient for proteins simultaneous assayed using SomaScan® and Olink® on 209 HERITAGE participants (Katz et al. 2022a).

**Supporting literature:** 1-7 are published proteomic associations with incident diabetes, 8-11 are published proteomic associations with prevalent diabetes.

1, 8: Gudmundsdottir, et al. (2020); 2: Williams et al. (2019); 3: Ngo et al. (2021); 4,9: Elhadad et al. (2020); 5: Huth et al. (2019); 6,10: Molvin et al. (2019); 7: Nowak et al (2016); 11: Beijer et al. (2019)

**MS evidence:** Mass spectrometry-based verification of aptamer-protein binding (Emilsson et al., 2018).

**pQTL evidence:** A: Emilsson et al. (2018); B: Suhre et al. (2017); C: Sun et al. (2018); D: Benson et al. (2018); E: Katz et al. (2022b); F: Pietzner et al. (2021); G: Ferkingstad et al. (2021); H: Zhang et al. (2022), European cohort; I: Zhang et al. (2022), African American cohort.

Information on protein subcellular location and function retrieved from Uniprot (The UniProt Consortium, 2021; <https://www.uniprot.org/>)

#Two aptamers targeting the same protein

---

### SUPPLEMENTAL TABLE 3: Plasma proteins associated with incident type 2 diabetes in the CHS cohort stratified by sex with test for interaction

All tests were adjusted for age, gender, race, clinic site, and estimated glomerular filtration rate.

HR: Hazard ratio; presents change in risk per standard deviation increase in log<sub>2</sub> protein unit at baseline

\*P-value adjusted for false discovery rate of 5%. All other p-values are unadjusted.

---

### SUPPLEMENTAL TABLE 4: Plasma proteins associated with longitudinal fasting glucose in the CHS cohort

Total model N = 4,176. Glucose data points per time point: N=2,285 at baseline, N=274 at +2 years, N=2,113 at +4 years, and N=1,789 at +6 years.

\*Model adjusted for age, gender, race, clinic site, and estimated glomerular filtration rate

‡Model adjusted for age, gender, race, clinic site, estimated glomerular filtration rate, BMI, smoking status, alcohol consumption status, and education

Estimates present annual change in fasting glucose concentration per standard deviation increase in log2 protein unit at baseline

‡ Spearman rho (ρ) coefficient for proteins simultaneously assayed using SomaScan® and Olink® on 209 HERITAGE participants (Katz et al. 2022a)

**Supporting literature:** 1-7 are published proteomic associations with incident diabetes, 8-11 are published proteomic associations with prevalent diabetes.  
1, 8: Gudmundsdottir, et al. (2020); 2: Williams et al. (2019); 3: Ngo et al. (2021); 4,9: Elhadad et al. (2020); 5: Huth et al. (2019); 6,10: Molvin et al. (2019);  
7: Nowak et al (2016); 11: Beijer et al. (2019)

**MS evidence:** Mass spectrometry-based verification of aptamer-protein binding (Emilsson et al., 2018).

**pQTL evidence:** A: Emilsson et al. (2018); B: Suhre et al. (2017); C: Sun et al. (2018); D: Benson et al. (2018); E: Katz et al. (2022b); F: Pietzner et al. (2021); G: Ferkingstad et al. (2021); H: Zhang et al. (2022), European cohort; I: Zhang et al. (2022), African American cohort.

---

**SUPPLEMENTAL TABLE 5: Plasma proteins associated with IVGTT traits in the HERITAGE cohort**

\*Model adjusted for age, gender, race, and family grouping. ‡ Additionally adjusted for BMI, smoking status, and alcohol consumption status

Insulin sensitivity estimates present change in log2 [ $10^{-4}$  min/(mU ml)] per standard deviation increase in log2 protein unit

Disposition index estimates present change in log2 ( $S_I \times AIR_G$ ) per standard deviation increase in log2 protein unit

Glucose effectiveness estimates present change per [ $10^{-4}$  min/(mU ml)]<sup>2</sup> per standard deviation increase in log2 protein unit

---

**SUPPLEMENTAL TABLE 6: Two-sample Mendelian Randomization results for the causal effect of proteins on type 2 diabetes.**

All aptamers with Bonferroni significant associations in the CHS models with appropriate genetic instruments are shown.

Genetic instruments selected from genome-wide association studies of SomaScan® aptamers, Emilsson et al. (2018); Suhre et al. (2017); Sun et al. (2018); Benson et al. (2018); Pietzner et al. (2021); Ferkingstad et al. (2021); European cohort from Zhang et al. (2022).

Type 2 diabetes genome-wide association summary data for individuals of European Ancestry from the DIAMANTE consortium, Mahajan et al. (2022).

Glycemic trait genome-wide association summary data for individuals of European Ancestry from the MAGIC consortium, Chen et al. (2021)

**SUPPLEMENTAL TABLE 7: Aptamer-specific genetic instruments included in Two-sample Mendelian Randomization analysis.**

Genetic instruments selected from genome-wide association studies of SomaScan® aptamers, Emilsson et al. (2018); Suhre et al. (2017); Sun et al. (2018); Benson et al. (2018); Pietzner et al. (2021); Ferkingstad et al. (2021); European cohort from Zhang et al. (2022).

Type 2 diabetes genome-wide association summary data for individuals of European Ancestry from the DIAMANTE consortium, Mahajan et al. (2022).

Glycemic trait genome-wide association summary data for individuals of European Ancestry from the MAGIC consortium, Chen et al. (2021)

---

## SUPPLEMENTAL TABLES: REFERENCE LIST

- Beijer K** et al. In search of causal pathways in diabetes: a study using proteomics and genotyping data from a cross-sectional study. *Diabetologia*. 2019;62(11):1998-2006.
- Benson MD** et al. Genetic Architecture of the Cardiovascular Risk Proteome. *Circulation*. 2018;137(11):1158-72.
- Chen J**, Spracklen CN, Marenne G, Varshney A, Corbin LJ, Luan Ja, et al. The trans-ancestral genomic architecture of glycemic traits. *Nature Genetics*. 2021;53(6):840-60.
- Elhadad MA** et al. Deciphering the plasma proteome of type 2 diabetes. *Diabetes*. 2020;69(12):2766-78.
- Emilsson V** et al. Co-regulatory networks of human serum proteins link genetics to disease. *Science*. 2018;361(6404):769-73.
- Ferkingstad E** et al. Large-scale integration of the plasma proteome with genetics and disease. *Nature Genetics*. 2021;53(12):1712-21.
- Gudmundsdottir V** et al. Circulating Protein Signatures and Causal Candidates for Type 2 Diabetes. *Diabetes*. 2020;69(8):1843-53.
- Huth C** et al. Protein markers and risk of type 2 diabetes and prediabetes: a targeted proteomics approach in the KORA F4/FF4 study. *European Journal of Epidemiology*. 2019;34(4):409-22.
- Katz, DH.**, Robbins, JM., Deng, S.,Tahir, UA.,Bick, AG, et al. Proteomic profiling platforms head to head: Leveraging genetics and clinical traits to compare aptamer- and antibody-based methods. *Science Advances*. 2022a;8(33):eabm5164.
- Katz DH** et al. Whole Genome Sequence Analysis of the Plasma Proteome in Black Adults Provides Novel Insights Into Cardiovascular Disease. *Circulation*. 2022b;145(5):357-70.
- Mahajan A**, Spracklen CN, Zhang W, Ng MCY, Petty LE, Kitajima H, et al. Multi-ancestry genetic study of type 2 diabetes highlights the power of diverse populations for discovery and translation. *Nature Genetics*. 2022;54(5):560-72.
- Molvin J** et al. Using a Targeted Proteomics Chip to Explore Pathophysiological Pathways for Incident Diabetes— The Malmö Preventive Project. *Scientific Reports*. 2019;9(1):272.
- Ngo D** et al. Proteomic profiling reveals biomarkers and pathways in type 2 diabetes risk. *JCI insight*. 2021;6(5).
- Nowak C** et al. Protein biomarkers for insulin resistance and type 2 diabetes risk in two large community cohorts. *Diabetes*. 2016;65(1):276-84.
- Pietzner M** et al. Mapping the proteo-genomic convergence of human diseases. *Science*. 2021;374(6569):eabj1541.
- Suhre K** et al. Connecting genetic risk to disease end points through the human blood plasma proteome. *Nature Communications*. 2017;8(1):14357.
- Sun BB** et al. Genomic atlas of the human plasma proteome. *Nature*. 2018;558(7708):73-9.
- The UniProt Consortium** (2020). UniProt: the universal protein knowledgebase in 2021. *Nucleic acids research* 49(D1): D480-D489.
- Williams SA** et al. Plasma protein patterns as comprehensive indicators of health. *Nature Medicine*. 2019;25(12):1851-7.
- Zhang J** et al. Plasma proteome analyses in individuals of European and African ancestry identify cis-pQTLs and models for proteome-wide association studies. *Nature Genetics*. 2022.

**SUPPLEMENTAL TABLE 1: Baseline clinical and lifestyle characteristics of the analytical cohorts**

| Characteristic                                                               | Cohort          |                     |
|------------------------------------------------------------------------------|-----------------|---------------------|
|                                                                              | CHS             | HERITAGE            |
| <b>N</b>                                                                     | 2,631           | 752                 |
| <b>Age</b> , years                                                           | 74.4 (4.9)      | 34.5 (13.5)         |
| <b>Sex</b> , female                                                          | 1,644 (62%)     | 415 (55%)           |
| <b>Race</b>                                                                  |                 |                     |
| Black                                                                        | 361 (14%)       | 289 (38%)           |
| Non-Black*                                                                   | 2,270 (86%)     | 463 (62%)           |
| <i>White</i>                                                                 | 2,258 (86%)     | 463 (62%)           |
| <i>American Indian/Alaskan Native</i>                                        | 3 (0.1%)        |                     |
| <i>Asian/Pacific Islander</i>                                                | 2 (<0.1%)       |                     |
| <i>Other</i>                                                                 | 7 (0.3%)        |                     |
| <b>Smoking Status</b>                                                        |                 |                     |
| Never Smoked                                                                 | 1,227 (47%)     | 484 (64%)           |
| Former Smoker                                                                | 1,154 (44%)     | 155 (21%)           |
| Current Smoker                                                               | 250 (9.5%)      | 113 (15%)           |
| <b>Alcohol Use</b> , current consumer                                        | 1,288 (49%)     | 353 (47%)           |
| <b>Education</b> , completed high school                                     | 2,028 (77%)     | 633 (95%)           |
| <b>Body mass index</b> , kg/m <sup>2</sup>                                   | 26.3 (4.4)      | 26.5 (5.5)          |
| <b>eGFR</b> , mL/min/1.73 m <sup>2†</sup>                                    | 70.0 (15.7)     |                     |
| <b>Fasting Glucose</b> , mg/dL                                               | 97.6 (9.6)      | 91.6 (11.8)         |
| <b>Follow Up</b> , years*                                                    | 11.6 (6.8–16.9) |                     |
| <b>Insulin Sensitivity (SI)</b> , 10 <sup>-4</sup> min/(mU ml) <sup>‡*</sup> |                 | 3.1 (1.8–4.9)       |
| <b>AIRG</b> , 10 min/(mU ml) <sup>‡*</sup>                                   |                 | 671 (401–1,244)     |
| <b>Disposition Index (DI)</b> , SI x AIRG <sup>‡*</sup>                      |                 | 2,214 (1,269–3,535) |
| <b>Glucose Effectiveness (SG)</b> , %/min <sup>‡*</sup>                      |                 | 0.016 (0.011–0.024) |

**SUPPLEMENTAL TABLE 2: Plasma proteins associated with incident type 2 diabetes in the CHS cohort (Columns A-H)**

| Aptamer ID | UniProt ID | Gene Symbol     | Target Protein Name                             | HR (95% CI)*     | p-value        | HR (95% CI) <sup>†</sup> | p-value        |
|------------|------------|-----------------|-------------------------------------------------|------------------|----------------|--------------------------|----------------|
| 10521-10   | Q9BRK3     | <i>MXRA8</i>    | Matrix-remodeling-associated protein 8          | 0.60 (0.53–0.67) | <b>6.0E-18</b> | 0.65 (0.57–0.73)         | <b>1.8E-12</b> |
| 8337-65    | Q92729     | <i>PTPRU</i>    | Receptor-type tyrosine-protein phosphatase U    | 1.35 (1.25–1.45) | <b>1.6E-15</b> | 1.32 (1.21–1.43)         | <b>2.4E-11</b> |
| 15562-24   | P08236     | <i>GUSB</i>     | Beta-glucuronidase                              | 1.54 (1.38–1.71) | <b>1.4E-15</b> | 1.46 (1.30–1.63)         | <b>2.5E-11</b> |
| 5722-78    | P42785     | <i>PRCP</i>     | Lysosomal Pro-X carboxypeptidase                | 1.54 (1.37–1.72) | <b>4.6E-14</b> | 1.46 (1.31–1.64)         | <b>5.4E-11</b> |
| 3343-1     | Q03154     | <i>ACY1</i>     | Aminoacylase-1                                  | 1.39 (1.27–1.52) | <b>6.4E-13</b> | 1.36 (1.24–1.48)         | <b>5.6E-11</b> |
| 12370-30   | Q13790     | <i>APOF</i>     | Apolipoprotein F                                | 0.64 (0.58–0.72) | <b>2.1E-16</b> | 0.68 (0.61–0.77)         | <b>7.2E-11</b> |
| 8469-41    | P18065     | <i>IGFBP2</i>   | Insulin-like growth factor-binding protein 2    | 0.63 (0.56–0.71) | <b>1.2E-14</b> | 0.66 (0.58–0.75)         | <b>2.8E-10</b> |
| 3554-24    | Q15848     | <i>ADIPOQ</i>   | Adiponectin                                     | 0.65 (0.58–0.72) | <b>8.6E-14</b> | 0.68 (0.61–0.77)         | <b>4.0E-10</b> |
| 14636-25   | P52758     | <i>HRSP12</i>   | Ribonuclease UK114                              | 1.36 (1.24–1.50) | <b>1.7E-10</b> | 1.34 (1.21–1.47)         | <b>3.1E-09</b> |
| 19241-31   | P82980     | <i>RBP5</i>     | Retinol-binding protein 5                       | 1.34 (1.23–1.46) | <b>5.6E-11</b> | 1.30 (1.19–1.42)         | <b>1.1E-08</b> |
| 9416-77    | P14384     | <i>CPM</i>      | Carboxypeptidase M                              | 1.36 (1.24–1.49) | <b>5.0E-11</b> | 1.32 (1.20–1.46)         | <b>1.9E-08</b> |
| 6408-2     | P55103     | <i>INHBC</i>    | Inhibin beta C chain                            | 1.50 (1.34–1.67) | <b>4.1E-13</b> | 1.40 (1.25–1.58)         | <b>2.3E-08</b> |
| 17396-23   | P07327     | <i>ADH1A</i>    | Alcohol dehydrogenase 1A                        | 1.33 (1.22–1.45) | <b>2.5E-11</b> | 1.28 (1.17–1.40)         | <b>3.0E-08</b> |
| 4929-55    | P04278     | <i>SHBG</i>     | Sex hormone-binding globulin                    | 0.67 (0.60–0.75) | <b>3.1E-12</b> | 0.72 (0.64–0.81)         | <b>3.5E-08</b> |
| 2948-58    | P10912     | <i>GHR</i>      | Growth hormone receptor                         | 1.47 (1.31–1.65) | <b>6.0E-11</b> | 1.4 (1.24–1.58)          | <b>6.5E-08</b> |
| 3362-61    | Q9BU40     | <i>CHRD1</i>    | Chordin-like protein 1                          | 0.67 (0.58–0.76) | <b>5.7E-10</b> | 0.69 (0.61–0.79)         | <b>7.1E-08</b> |
| 5452-71    | P07306     | <i>ASGR1</i>    | Asialoglycoprotein receptor 1                   | 1.34 (1.22–1.47) | <b>4.8E-10</b> | 1.29 (1.17–1.41)         | <b>7.4E-08</b> |
| 7206-20    | P09467     | <i>FBP1</i>     | Fructose-1.6-bisphosphatase 1                   | 1.31 (1.20–1.43) | <b>1.1E-09</b> | 1.28 (1.17–1.39)         | <b>8.9E-08</b> |
| 6379-62    | Q86TH1     | <i>ADAMTSL2</i> | ADAMTS-like protein 2                           | 1.37 (1.25–1.50) | <b>3.2E-11</b> | 1.30 (1.18–1.43)         | <b>1.0E-07</b> |
| 7957-2     | Q8WXD2     | <i>SCG3</i>     | Secretogranin-3                                 | 0.68 (0.61–0.76) | <b>1.8E-12</b> | 0.74 (0.66–0.82)         | <b>1.1E-07</b> |
| 10565-19   | O94933     | <i>SLITRK3</i>  | SLIT and NTRK-like protein 3                    | 0.69 (0.63–0.77) | <b>3.5E-12</b> | 0.75 (0.67–0.83)         | <b>1.2E-07</b> |
| 3009-3     | Q03167     | <i>TGFBR3</i>   | Transforming growth factor beta receptor type 3 | 0.71 (0.63–0.79) | <b>8.1E-10</b> | 0.74 (0.66–0.83)         | <b>1.3E-07</b> |
| 15487-164  | P23141     | <i>CES1</i>     | Liver carboxylesterase 1                        | 1.33 (1.21–1.47) | <b>3.2E-09</b> | 1.29 (1.17–1.43)         | <b>2.1E-07</b> |
| 15525-294  | P00326     | <i>ADH1C</i>    | Alcohol dehydrogenase 1C                        | 1.32 (1.20–1.45) | <b>4.8E-09</b> | 1.28 (1.16–1.40)         | <b>3.1E-07</b> |
| 16307-22   | Q6UXZ4     | <i>UNC5D</i>    | Netrin receptor UNC5D                           | 0.66 (0.58–0.74) | <b>1.5E-12</b> | 0.72 (0.63–0.82)         | <b>3.1E-07</b> |
| 5105-2     | Q9BZR6     | <i>RTN4R</i>    | Reticulon-4 receptor                            | 1.39 (1.25–1.55) | <b>1.3E-09</b> | 1.34 (1.20–1.50)         | <b>3.9E-07</b> |
| 13998-26   | Q8N142     | <i>ADSSL1</i>   | Adenylosuccinate synthetase isozyme 1           | 1.27 (1.17–1.39) | <b>3.8E-08</b> | 1.26 (1.15–1.37)         | <b>3.9E-07</b> |

|                       |        |                |                                                    |                  |                |                  |                |
|-----------------------|--------|----------------|----------------------------------------------------|------------------|----------------|------------------|----------------|
| 18185-118             | P05062 | <i>ALDOB</i>   | Fructose-bisphosphate aldolase B                   | 1.28 (1.17–1.40) | <b>1.5E-07</b> | 1.27 (1.16–1.40) | <b>4.3E-07</b> |
| 13460-4               | O15335 | <i>CHAD</i>    | Chondroadherin                                     | 0.75 (0.67–0.83) | <b>6.6E-08</b> | 0.76 (0.68–0.84) | <b>4.6E-07</b> |
| 9216-100              | O15031 | <i>PLXNB2</i>  | Plexin-B2                                          | 1.36 (1.21–1.54) | <b>6.1E-07</b> | 1.36 (1.21–1.54) | <b>6.1E-07</b> |
| 6462-12               | Q99727 | <i>TIMP4</i>   | Metalloproteinase inhibitor 4                      | 0.76 (0.68–0.86) | <b>4.3E-06</b> | 0.74 (0.66–0.84) | <b>6.2E-07</b> |
| 11241-8               | P04424 | <i>ASL</i>     | Argininosuccinate lyase                            | 1.25 (1.14–1.36) | <b>1.1E-06</b> | 1.25 (1.15–1.37) | <b>8.7E-07</b> |
| 7179-69               | O94856 | <i>NFASC</i>   | Neurofascin                                        | 1.23 (1.13–1.32) | <b>2.7E-07</b> | 1.22 (1.13–1.33) | <b>9.4E-07</b> |
| 8325-37               | P08319 | <i>ADH4</i>    | Alcohol dehydrogenase 4                            | 1.30 (1.19–1.42) | <b>6.0E-09</b> | 1.26 (1.15–1.38) | <b>9.9E-07</b> |
| 15426-5               | Q99519 | <i>NEU1</i>    | Sialidase-1                                        | 1.21 (1.14–1.29) | <b>3.6E-09</b> | 1.18 (1.11–1.27) | <b>1.1E-06</b> |
| 5632-6                | Q9NQ79 | <i>CRTAC1</i>  | Cartilage acidic protein 1                         | 0.77 (0.69–0.85) | <b>4.3E-07</b> | 0.77 (0.69–0.86) | <b>1.1E-06</b> |
| 15447-45              | Q00796 | <i>SORD</i>    | Sorbitol dehydrogenase                             | 1.31 (1.19–1.45) | <b>9.7E-08</b> | 1.29 (1.16–1.42) | <b>1.2E-06</b> |
| 9213-24               | O95954 | <i>FTCD</i>    | Formimidoyltransferase-cyclodeaminase              | 1.31 (1.19–1.45) | <b>5.3E-08</b> | 1.28 (1.16–1.41) | <b>1.4E-06</b> |
| 3331-8                | Q6NW40 | <i>RGMB</i>    | RGM domain family member B                         | 0.67 (0.60–0.76) | <b>3.8E-10</b> | 0.73 (0.64–0.83) | <b>1.5E-06</b> |
| 7050-5 <sup>#</sup>   | Q7Z3B1 | <i>NEGR1</i>   | Neuronal growth regulator 1 <sup>#</sup>           | 0.70 (0.62–0.79) | <b>7.3E-09</b> | 0.74 (0.65–0.84) | <b>1.7E-06</b> |
| 13109-82 <sup>#</sup> | Q7Z3B1 | <i>NEGR1</i>   | Neuronal growth regulator 1 <sup>#</sup>           | 0.72 (0.65–0.81) | <b>6.0E-09</b> | 0.77 (0.69–0.86) | <b>3.8E-06</b> |
| 6388-21               | Q96EE4 | <i>CCDC126</i> | Coiled-coil domain-containing protein 126          | 0.70 (0.63–0.78) | <b>1.5E-10</b> | 0.76 (0.68–0.85) | <b>1.7E-06</b> |
| 15483-377             | O00468 | <i>AGRN</i>    | Agrin                                              | 1.35 (1.23–1.48) | <b>7.7E-10</b> | 1.27 (1.15–1.41) | <b>2.4E-06</b> |
| 5708-1                | Q969E1 | <i>LEAP2</i>   | Liver-expressed antimicrobial peptide 2            | 1.35 (1.22–1.50) | <b>2.0E-08</b> | 1.29 (1.16–1.44) | <b>2.4E-06</b> |
| 16558-2               | Q99972 | <i>MYOC</i>    | Myocilin                                           | 0.75 (0.67–0.83) | <b>2.3E-07</b> | 0.77 (0.69–0.86) | <b>2.9E-06</b> |
| 14079-14              | Q13478 | <i>IL18R1</i>  | Interleukin-18 receptor 1                          | 1.22 (1.13–1.32) | <b>2.4E-07</b> | 1.21 (1.12–1.32) | <b>3.6E-06</b> |
| 6049-64               | Q13332 | <i>PTPRS</i>   | Receptor-type tyrosine-protein phosphatase S       | 0.75 (0.68–0.84) | <b>9.4E-08</b> | 0.78 (0.7–0.87)  | <b>3.7E-06</b> |
| 13496-19              | Q01581 | <i>HMGCS1</i>  | Hydroxymethylglutaryl-CoA synthase.<br>cytoplasmic | 1.28 (1.16–1.41) | <b>7.5E-07</b> | 1.27 (1.15–1.4)  | <b>3.9E-06</b> |
| 18342-2               | Q9Y617 | <i>PSAT1</i>   | Phosphoserine aminotransferase                     | 1.27 (1.16–1.39) | <b>3.9E-07</b> | 1.25 (1.14–1.37) | <b>4.0E-06</b> |
| 3339-33               | P35442 | <i>THBS2</i>   | Thrombospondin-2                                   | 1.31 (1.19–1.44) | <b>4.6E-08</b> | 1.26 (1.14–1.39) | <b>4.5E-06</b> |
| 6557-50               | Q8TF66 | <i>LRRC15</i>  | Leucine-rich repeat-containing protein 15          | 0.76 (0.68–0.85) | <b>7.4E-07</b> | 0.77 (0.69–0.86) | <b>4.8E-06</b> |
| 17366-6               | Q96GG9 | <i>DCUNID1</i> | DCN1-like protein 1                                | 1.28 (1.18–1.38) | <b>7.9E-10</b> | 1.22 (1.12–1.34) | <b>9.4E-06</b> |
| 13697-51              | P21695 | <i>GPD1</i>    | Glycerol-3-phosphate dehydrogenase [NAD(+)].       | 1.36 (1.23–1.50) | <b>1.4E-09</b> | 1.27 (1.14–1.41) | 1.0E-05        |
| 16907-3               | Q8N3J6 | <i>CADM2</i>   | Cell adhesion molecule 2                           | 0.68 (0.60–0.77) | <b>6.3E-10</b> | 0.75 (0.66–0.85) | 1.2E-05        |
| 5078-82               | O15197 | <i>EPHB6</i>   | Ephrin type-B receptor 6                           | 0.69 (0.60–0.79) | <b>1.4E-07</b> | 0.73 (0.64–0.84) | 1.2E-05        |
| 18398-1               | P51857 | <i>AKR1D1</i>  | 3-oxo-5-beta-steroid 4-dehydrogenase               | 1.23 (1.14–1.33) | <b>1.2E-07</b> | 1.20 (1.11–1.31) | 1.6E-05        |

|          |        |                  |                                                       |                  |                |                  |         |
|----------|--------|------------------|-------------------------------------------------------|------------------|----------------|------------------|---------|
| 5939-42  | O43508 | <i>TNFSF12</i>   | Tumor necrosis factor ligand superfamily member 12    | 0.71 (0.61–0.81) | <b>1.5E-06</b> | 0.74 (0.64–0.85) | 1.9E-05 |
| 7638-30  | Q12907 | <i>LMAN2</i>     | Vesicular integral-membrane protein VIP36             | 1.35 (1.22–1.49) | <b>9.0E-09</b> | 1.26 (1.13–1.41) | 2.1E-05 |
| 18893-26 | Q9Y653 | <i>GPR56</i>     | Adhesion G-protein coupled receptor G1                | 1.24 (1.14–1.35) | <b>2.6E-07</b> | 1.20 (1.10–1.31) | 2.7E-05 |
| 11278-4  | P13942 | <i>COL11A2</i>   | Collagen alpha-2(XI) chain                            | 0.79 (0.71–0.87) | <b>7.0E-06</b> | 0.80 (0.71–0.89) | 3.0E-05 |
| 15594-47 | Q92743 | <i>HTRA1</i>     | Serine protease HTRA1                                 | 1.33 (1.21–1.45) | <b>7.9E-10</b> | 1.23 (1.11–1.36) | 4.3E-05 |
| 4125-52  | Q15109 | <i>AGER</i>      | Advanced glycosylation end product-specific receptor. | 0.75 (0.67–0.83) | <b>1.5E-07</b> | 0.79 (0.71–0.89) | 4.4E-05 |
| 16916-19 | Q9H5Y7 | <i>SLITRK6</i>   | SLIT and NTRK-like protein 6                          | 0.71 (0.62–0.81) | <b>5.3E-07</b> | 0.76 (0.66–0.87) | 4.5E-05 |
| 18397-5  | P17516 | <i>AKR1C4</i>    | Aldo-keto reductase family 1 member C4                | 1.25 (1.14–1.37) | <b>1.3E-06</b> | 1.21 (1.10–1.33) | 5.0E-05 |
| 18841-1  | Q9UIV8 | <i>SERPINB13</i> | Serpin B13                                            | 0.73 (0.64–0.84) | <b>6.9E-06</b> | 0.76 (0.66–0.87) | 5.1E-05 |
| 5000-52  | Q08380 | <i>LGALS3BP</i>  | Galectin-3-binding protein                            | 1.29 (1.17–1.42) | <b>3.9E-07</b> | 1.23 (1.11–1.36) | 5.1E-05 |
| 15511-37 | O95502 | <i>NPTXR</i>     | Neuronal pentraxin receptor                           | 0.72 (0.64–0.80) | <b>1.3E-08</b> | 0.78 (0.70–0.88) | 5.3E-05 |
| 5353-89  | P18510 | <i>IL1RN</i>     | Interleukin-1 receptor antagonist protein             | 1.20 (1.12–1.28) | <b>2.5E-07</b> | 1.17 (1.08–1.26) | 6.1E-05 |
| 5036-50  | P98066 | <i>TNFAIP6</i>   | Tumor necrosis factor-inducible gene 6 protein        | 0.76 (0.68–0.86) | <b>3.2E-06</b> | 0.79 (0.71–0.89) | 6.1E-05 |
| 2580-83  | P05164 | <i>MPO</i>       | Myeloperoxidase                                       | 1.27 (1.15–1.41) | <b>2.1E-06</b> | 1.23 (1.11–1.36) | 6.6E-05 |
| 13501-10 | Q8TBE7 | <i>SLC35G2</i>   | Solute carrier family 35 member G2                    | 1.21 (1.12–1.31) | <b>1.1E-06</b> | 1.18 (1.09–1.28) | 6.9E-05 |
| 5843-60  | Q96KQ7 | <i>EHMT2</i>     | Histone-lysine N-methyltransferase EHMT2              | 0.73 (0.65–0.81) | <b>3.6E-08</b> | 0.79 (0.70–0.89) | 6.9E-05 |
| 7198-197 | O75063 | <i>FAM20B</i>    | Glycosaminoglycan xylosylkinase                       | 0.73 (0.65–0.82) | <b>2.1E-07</b> | 0.78 (0.69–0.88) | 8.7E-05 |
| 15559-5  | P58335 | <i>ANTXR2</i>    | Anthrax toxin receptor 2                              | 0.75 (0.67–0.83) | <b>1.4E-07</b> | 0.80 (0.72–0.89) | 8.9E-05 |
| 18917-53 | P04746 | <i>AMY2A</i>     | Pancreatic alpha-amylase                              | 0.74 (0.67–0.82) | <b>7.8E-09</b> | 0.81 (0.72–0.9)  | 1.2E-04 |
| 19553-14 | Q16623 | <i>STX1A</i>     | Syntaxin-1A                                           | 0.72 (0.63–0.81) | <b>2.0E-07</b> | 0.78 (0.68–0.88) | 1.2E-04 |
| 15467-10 | Q96CG8 | <i>CTHRC1</i>    | Collagen triple helix repeat-containing protein 1     | 0.79 (0.71–0.87) | <b>3.4E-06</b> | 0.82 (0.74–0.91) | 1.3E-04 |
| 2212-69  | P00750 | <i>PLAT</i>      | Tissue-type plasminogen activator                     | 1.34 (1.21–1.50) | <b>9.7E-08</b> | 1.25 (1.11–1.40) | 1.4E-04 |
| 14618-26 | Q96AW1 | <i>VOPPI</i>     | Vesicular prosurvival protein 1                       | 0.72 (0.64–0.82) | <b>3.3E-07</b> | 0.79 (0.69–0.89) | 1.6E-04 |
| 11237-49 | Q15113 | <i>PCOLCE</i>    | Procollagen C-endopeptidase enhancer 1                | 0.79 (0.71–0.87) | <b>6.4E-06</b> | 0.82 (0.73–0.91) | 1.8E-04 |
| 10464-6  | Q9H6X2 | <i>ANTXR1</i>    | Anthrax toxin receptor 1                              | 0.75 (0.67–0.84) | <b>4.0E-07</b> | 0.80 (0.72–0.90) | 1.8E-04 |
| 9377-25  | P21583 | <i>KITLG</i>     | Kit ligand                                            | 0.78 (0.70–0.87) | <b>6.0E-06</b> | 0.81 (0.73–0.91) | 2.1E-04 |
| 18411-83 | Q9NXU5 | <i>ARL15</i>     | ADP-ribosylation factor-like protein 15               | 1.22 (1.12–1.32) | <b>5.2E-06</b> | 1.18 (1.08–1.29) | 2.1E-04 |
| 7210-25  | P51693 | <i>APLP1</i>     | Amyloid-like protein 1                                | 0.76 (0.69–0.84) | <b>6.3E-08</b> | 0.82 (0.74–0.91) | 2.6E-04 |
| 10445-20 | O95445 | <i>APOM</i>      | Apolipoprotein M                                      | 0.76 (0.69–0.85) | <b>3.1E-07</b> | 0.82 (0.74–0.91) | 3.2E-04 |

|           |        |                  |                                                                          |                  |                |                  |         |
|-----------|--------|------------------|--------------------------------------------------------------------------|------------------|----------------|------------------|---------|
| 14131-37  | P52799 | <i>EFNB2</i>     | Ephrin-B2                                                                | 0.74 (0.65–0.84) | <b>7.3E-06</b> | 0.78 (0.69–0.89) | 3.2E-04 |
| 9002-36   | Q86U17 | <i>SERPINA11</i> | Serpin A11                                                               | 0.77 (0.69–0.87) | <b>8.4E-06</b> | 0.81 (0.72–0.91) | 3.4E-04 |
| 9484-75   | Q14126 | <i>DSG2</i>      | Desmoglein-2                                                             | 0.79 (0.71–0.88) | <b>7.9E-06</b> | 0.83 (0.75–0.92) | 3.5E-04 |
| 16890-37  | Q8N6G6 | <i>ADAMTSL1</i>  | ADAMTS-like protein 1                                                    | 0.76 (0.68–0.85) | <b>9.7E-07</b> | 0.81 (0.73–0.91) | 3.8E-04 |
| 11214-40  | Q9UBS3 | <i>DNAJB9</i>    | DnaJ homolog subfamily B member 9                                        | 1.29 (1.17–1.43) | <b>8.3E-07</b> | 1.21 (1.09–1.34) | 4.1E-04 |
| 2771-35   | P08833 | <i>IGFBP1</i>    | Insulin-like growth factor-binding protein 1                             | 0.75 (0.68–0.83) | <b>6.8E-09</b> | 0.83 (0.74–0.92) | 4.2E-04 |
| 7970-315  | Q13508 | <i>ART3</i>      | Ecto-ADP-ribosyltransferase 3                                            | 0.72 (0.64–0.81) | <b>5.5E-08</b> | 0.80 (0.70–0.91) | 4.2E-04 |
| 8484-24   | P41159 | <i>LEP</i>       | Leptin                                                                   | 1.46 (1.27–1.68) | <b>5.9E-08</b> | 1.25 (1.04–1.49) | 4.2E-04 |
| 19563-3   | Q9BYH1 | <i>SEZ6L</i>     | Seizure 6-like protein                                                   | 0.74 (0.66–0.83) | <b>8.0E-08</b> | 0.83 (0.73–0.93) | 4.2E-04 |
| 3235-50   | Q8TEU8 | <i>WFIKK2</i>    | WAP. Kazal. immunoglobulin. Kunitz and NTR domain-containing protein 2   | 0.75 (0.67–0.83) | <b>1.1E-07</b> | 0.83 (0.74–0.92) | 4.2E-04 |
| 9296-15   | P23468 | <i>PTPRD</i>     | Receptor-type tyrosine-protein phosphatase delta                         | 0.76 (0.68–0.84) | <b>4.0E-07</b> | 0.83 (0.74–0.94) | 4.2E-04 |
| 9018-38   | Q9P2E7 | <i>PCDH10</i>    | Protocadherin-10                                                         | 0.71 (0.63–0.81) | <b>4.2E-07</b> | 0.81 (0.7–0.93)  | 4.2E-04 |
| 9312-8    | P25311 | <i>AZGP1</i>     | Zinc-alpha-2-glycoprotein                                                | 0.80 (0.74–0.87) | <b>5.1E-07</b> | 0.86 (0.78–0.95) | 4.2E-04 |
| 15556-49  | P19961 | <i>AMY2B</i>     | Alpha-amylase 2B                                                         | 0.76 (0.69–0.85) | <b>5.9E-07</b> | 0.84 (0.75–0.93) | 4.2E-04 |
| 8352-26   | Q96PQ1 | <i>SIGLEC12</i>  | Sialic acid-binding Ig-like lectin 12                                    | 1.25 (1.14–1.37) | <b>1.9E-06</b> | 1.18 (1.07–1.30) | 4.2E-04 |
| 15539-15  | Q96PX8 | <i>SLITRK1</i>   | SLIT and NTRK-like protein 1                                             | 0.74 (0.65–0.84) | <b>2.8E-06</b> | 0.83 (0.73–0.95) | 4.2E-04 |
| 3049-61   | P07477 | <i>PRSS1</i>     | Trypsin-1                                                                | 0.77 (0.70–0.86) | <b>3.0E-06</b> | 0.83 (0.74–0.93) | 4.2E-04 |
| 15573-110 | O14594 | <i>NCAN</i>      | Neurocan core protein                                                    | 0.78 (0.70–0.86) | <b>3.1E-06</b> | 0.86 (0.77–0.96) | 4.2E-04 |
| 16908-5   | P23515 | <i>OMG</i>       | Oligodendrocyte-myelin glycoprotein                                      | 0.79 (0.71–0.87) | <b>5.9E-06</b> | 0.83 (0.75–0.92) | 4.2E-04 |
| 2950-57   | P22692 | <i>IGFBP4</i>    | Insulin-like growth factor-binding protein 4                             | 1.28 (1.15–1.43) | <b>6.1E-06</b> | 1.20 (1.07–1.34) | 4.2E-04 |
| 4568-17   | O94991 | <i>SLITRK5</i>   | SLIT and NTRK-like protein 5                                             | 0.76 (0.68–0.86) | <b>6.7E-06</b> | 0.82 (0.73–0.93) | 4.2E-04 |
| 5657-28   | Q11201 | <i>ST3GAL1</i>   | CMP-N-acetylneuraminate-beta-galactosamide-alpha-2.3-sialyltransferase 1 | 0.74 (0.65–0.84) | <b>7.1E-06</b> | 0.82 (0.71–0.93) | 4.2E-04 |
| 6383-90   | O43897 | <i>TLL1</i>      | Tolloid-like protein 1                                                   | 1.28 (1.15–1.42) | <b>7.5E-06</b> | 1.21 (1.08–1.34) | 4.2E-04 |
| 2837-3    | P08581 | <i>MET</i>       | Hepatocyte growth factor receptor                                        | 0.80 (0.72–0.88) | <b>7.7E-06</b> | 0.85 (0.76–0.94) | 4.2E-04 |
| 18896-23  | Q8IZP7 | <i>HS6ST3</i>    | Heparan-sulfate 6-O-sulfotransferase 3                                   | 0.75 (0.66–0.85) | <b>8.2E-06</b> | 0.84 (0.73–0.95) | 4.2E-04 |
| 4876-32   | P00740 | <i>F9</i>        | Coagulation factor IX                                                    | 1.32 (1.17–1.49) | <b>8.9E-06</b> | 1.22 (1.07–1.38) | 4.2E-04 |



**SUPPLEMENTAL TABLE 2: Plasma proteins associated with incident type 2 diabetes in the CHS cohort (Columns C,I-N)**

| Gene Symbol   | $\rho^{\ddagger}$ | MS       | pQTL evidence | Supporting literature | Subcellular location         | Function                                                                                                                                                                                                                                                                                   |
|---------------|-------------------|----------|---------------|-----------------------|------------------------------|--------------------------------------------------------------------------------------------------------------------------------------------------------------------------------------------------------------------------------------------------------------------------------------------|
| <i>MXRA8</i>  |                   |          | F,G,H,I       | 1,2,8                 | Cell membrane, cell junction | Transmembrane protein which can modulate activity of various signaling pathways, probably via binding to integrin. Mediates heterophilic cell-cell interactions in vitro.                                                                                                                  |
| <i>PTPRU</i>  |                   |          | F,G,H,I       | 1,8                   | Cell junction; cell membrane | Tyrosine-protein phosphatase which dephosphorylates CTNNB1. May function in cell proliferation and migration and play a role in the maintenance of epithelial integrity.                                                                                                                   |
| <i>GUSB</i>   | 0.89              |          | F,G,H,I       |                       | Lysosome                     | Plays an important role in the degradation of dermatan and keratan sulfates.                                                                                                                                                                                                               |
| <i>PRCP</i>   | 0.68              |          | A,C,F,G,H,I   | 2,8                   | Lysosome                     | Cleaves C-terminal amino acids linked to proline in peptides such as angiotensin II, III and des-Arg9-bradykinin.                                                                                                                                                                          |
| <i>ACY1</i>   | 0.89              | DDA, MRM | E,F,G,H,I     | 1,3,4,8,9             | Cytoplasm                    | Catalyzes the hydrolysis of N-acetylated amino acids to acetate and free amino acids.                                                                                                                                                                                                      |
| <i>APOF</i>   |                   |          | C,F,G,H,I     | 1,2,8                 | Secreted                     | Minor apolipoprotein that associates with LDL. Inhibits cholesteryl ester transfer protein (CETP) activity and appears to be an important regulator of cholesterol transport.                                                                                                              |
| <i>IGFBP2</i> | 0.77              | DDA      | G,H           | 1,2,3,4,6,8,9,10,11   | Secreted                     | Prolongs IGF half-life. Either inhibits or stimulates the growth promoting effects of the IGFs on cell culture. Alters the interaction of IGFs with their cell surface receptors.                                                                                                          |
| <i>ADIPOQ</i> |                   |          | D',F,G,H,I    | 1,3,4,5,8,9           | Secreted                     | Involved in the control of fat metabolism and insulin sensitivity, with direct anti-diabetic, anti-atherogenic and anti-inflammatory activities. Stimulates AMPK phosphorylation and activation in the liver and skeletal muscle, enhancing glucose utilization and fatty-acid combustion. |
| <i>HRSP12</i> |                   |          | C,F,G,H,I     | 1,2,8                 | Cytoplasm                    | Catalyzes the hydrolytic deamination of enamine/imine intermediates that form during the course of normal metabolism.                                                                                                                                                                      |
| <i>RBP5</i>   | 0.66              |          | F,G,H,I       | 2                     | Cytoplasm                    | Intracellular transport of retinol.                                                                                                                                                                                                                                                        |
| <i>CPM</i>    | 0.75              | DDA      | A,F,G,H,I     | 1,2,8                 | Cell membrane                | Specifically removes C-terminal basic residues from peptides and proteins. Plays important roles in the control of peptide hormone and growth factor activity at the cell surface, and in the membrane-localized degradation of extracellular proteins.                                    |
| <i>INHBC</i>  | 0.40              | DDA      | A,C',G,H,I    | 1,2,8                 | Secreted                     | Involved in regulation of various functions depending on subunit composition: hypothalamic, pituitary, and gonadal hormone secretion, follitropin and insulin secretion, nerve cell survival.                                                                                              |
| <i>ADH1A</i>  |                   |          | F,G,H,I       | 2                     | Cytoplasm                    | Oxidizes primary as well as secondary alcohols.                                                                                                                                                                                                                                            |
| <i>SHBG</i>   |                   |          | F,G,H,I       | 1,2,3,8,9             | Secreted                     | Functions as an androgen transport protein but may also be involved in receptor mediated processes. Regulates the plasma metabolic clearance rate of steroid hormones.                                                                                                                     |
| <i>GHR</i>    |                   |          | C,E,F,G,H,I   | 1,3,4,8               | Cell membrane                | Receptor for pituitary gland GH involved in regulating body growth. The soluble form acts as a reservoir of GH in plasma and may be a modulator/inhibitor of GH signaling.                                                                                                                 |
| <i>CHRD1</i>  | 0.33              | DDA      | F,G           | 3,8,9                 | Secreted                     | Antagonizes BMP4 function by binding to it and preventing its interaction with receptors. Alters the fate commitment of neural stem cells from gliogenesis to neurogenesis. Contributes to neuronal differentiation of neural stem cells by preventing the adoption of a glial fate.       |
| <i>ASGR1</i>  | 0.49              |          | A',F,G,H,I    |                       | Membrane                     | Mediates the endocytosis of plasma glycoproteins to which the terminal sialic acid residue on their complex carbohydrate moieties has been removed.                                                                                                                                        |
| <i>FBP1</i>   | 0.51              | DDA, MRM | A,C',F,G,H,I  | 1,2,8                 |                              | Plays a role in regulating glucose sensing and insulin secretion of pancreatic beta-cells. Appears to modulate glycerol gluconeogenesis in liver.                                                                                                                                          |

|                 |      |          |                  |           |                                        |                                                                                                                                                                                                                                                                                                                                                                                                                      |
|-----------------|------|----------|------------------|-----------|----------------------------------------|----------------------------------------------------------------------------------------------------------------------------------------------------------------------------------------------------------------------------------------------------------------------------------------------------------------------------------------------------------------------------------------------------------------------|
| <i>ADAMTSL2</i> |      |          | F,G,H            | 1,8       | Secreted                               |                                                                                                                                                                                                                                                                                                                                                                                                                      |
| <i>SCG3</i>     | 0.60 | DDA      | A,C,F,G,H,I      | 2,8       | Cytoplasmic vesicle                    | Member of the granin protein family that regulates the biogenesis of secretory granules. Acts as a sorting receptor for intragranular proteins including chromogranin A/CHGA.                                                                                                                                                                                                                                        |
| <i>SLITRK3</i>  |      |          | C,F,G,H,I        | 2,8       | Membrane                               | Suppresses neurite outgrowth.                                                                                                                                                                                                                                                                                                                                                                                        |
| <i>TGFBR3</i>   | 0.30 |          | F,G,H,I          | 3,4,8,9   | Secreted                               | Binds to TGF- $\beta$ . Could capture and retain TGF- $\beta$ for presentation to the signaling receptors.                                                                                                                                                                                                                                                                                                           |
| <i>CES1</i>     | 0.52 |          | F',G',H,I        |           | Endoplasmic reticulum lumen, cytoplasm | Converts monoacylglycerides to free fatty acids and glycerol. Hydrolyzes cellular cholesteryl esters to free cholesterol and promotes reverse cholesterol transport by allowing free cholesterol efflux from macrophages to extracellular cholesterol acceptors and releasing free cholesterol from lipoprotein-delivered cholesteryl esters in the liver for bile acid synthesis or direct secretion into the bile. |
| <i>ADH1C</i>    |      |          | F',G,H,I         |           | Cytoplasm                              | Exhibits high activity for ethanol oxidation and plays a major role in ethanol catabolism.                                                                                                                                                                                                                                                                                                                           |
| <i>UNC5D</i>    |      |          | F,G,H,I          | 2,3,4,8,9 | Cell membrane                          | Receptor for the netrin NTN4 that promotes neuronal cell survival. Plays a role in cell-cell adhesion and cell guidance. Receptor for netrin involved in cell migration. Plays a role in axon guidance by mediating axon repulsion of neuronal growth cones in the developing nervous system upon ligand binding.                                                                                                    |
| <i>RTN4R</i>    | 0.65 |          | A,C,D',E,F,G,H,I | 1,3,8     | Cell membrane                          | Receptor for RTN4, OMG and MAG. Functions as receptors for the sialylated gangliosides GT1b and GM1, and chondroitin sulfate proteoglycans. Can also bind heparin.                                                                                                                                                                                                                                                   |
| <i>ADSSL1</i>   |      |          | F,G,H,I          | 1,8       | Cytoplasm                              | Component of the purine nucleotide cycle, which interconverts IMP and AMP to regulate the nucleotide levels in various tissues, and which contributes to glycolysis and ammoniogenesis. Catalyzes the first committed step in the biosynthesis of AMP from IMP.                                                                                                                                                      |
| <i>ALDOB</i>    |      |          | F,G,H            |           | Cytoplasm                              |                                                                                                                                                                                                                                                                                                                                                                                                                      |
| <i>CHAD</i>     |      |          | F,G,H,I          | 2,8       | Secreted                               | Promotes attachment of chondrocytes, fibroblasts, and osteoblasts. May play an important role in the regulation of chondrocyte growth and proliferation.                                                                                                                                                                                                                                                             |
| <i>PLXNB2</i>   | 0.44 |          | A,C,E,F,G,H,I    | 8         | Cell membrane                          | Cell surface receptor for SEMA4C, SEMA4D and SEMA4G that plays an important role in cell-cell signaling. Plays a role in glutamatergic synapse development and is required for SEMA4A-mediated excitatory synapse development.                                                                                                                                                                                       |
| <i>TIMP4</i>    | 0.76 |          | A,C,F,G,H,I      | 2         | Secreted                               | Complexes with metalloproteinases and irreversibly inactivates them by binding to their catalytic zinc cofactor. Known to act on MMP-1, MMP-2, MMP-3, MMP-7 and MMP-9.                                                                                                                                                                                                                                               |
| <i>ASL</i>      |      |          | F,G,H,I          | 1,2,8     |                                        | Catalyzes the reversible cleavage of L-argininosuccinate to fumarate and L-arginine, an intermediate step reaction in the urea cycle mostly providing for hepatic nitrogen detoxification into excretable urea as well as de novo L-arginine synthesis in nonhepatic tissues.                                                                                                                                        |
| <i>NFASC</i>    | 0.65 | MRM      | A,C,F,G,H,I      | 8         | Cell membrane                          | Cell adhesion, ankyrin-binding protein which may be involved in neurite extension, axonal guidance, synaptogenesis, myelination and neuron-glial cell interactions.                                                                                                                                                                                                                                                  |
| <i>ADH4</i>     | 0.92 | DDA, MRM | A,F,G,H,I        | 1,8       | Cytoplasm                              | Catalyzes the NAD-dependent oxidation of either all-trans-retinol or 9-cis-retinol. Also oxidizes long chain omega-hydroxy fatty acids producing both the intermediate aldehyde, 20-oxoarachidonate and the end product (5Z,8Z,11Z,14Z)-eicosatetraenedioate .                                                                                                                                                       |
| <i>NEU1</i>     |      |          | F',G,H,I         | 2         | Lysosome membrane                      | Catalyzes the removal of sialic acid moieties from glycoproteins and glycolipids.                                                                                                                                                                                                                                                                                                                                    |
| <i>CRTAC1</i>   | 0.66 | DDA      | A,F,G,H,I        | 8         | Secreted                               |                                                                                                                                                                                                                                                                                                                                                                                                                      |

|                |      |          |                    |         |                        |                                                                                                                                                                                                                                                                                                                      |
|----------------|------|----------|--------------------|---------|------------------------|----------------------------------------------------------------------------------------------------------------------------------------------------------------------------------------------------------------------------------------------------------------------------------------------------------------------|
| <i>SORD</i>    | 0.77 |          | F,G,H,I            |         | Mitochondrion membrane | Polyol dehydrogenase that catalyzes the reversible NAD(+)-dependent oxidation of various sugar alcohols. Is mostly active with D-sorbitol, L-threitol, xylitol and ribitol as substrates, leading to C2-oxidized products D-fructose, L-erythrulose, D-xylulose, and D-ribulose.                                     |
| <i>FTCD</i>    |      |          | E,F,G              | 1,2,3,8 | Cytoplasm              | Folate-dependent enzyme, that displays both transferase and deaminase activity. Serves to channel one-carbon units from formiminoglutamate to the folate pool.                                                                                                                                                       |
| <i>RGMB</i>    | 0.43 |          | C,F,G,H,I          | 3,9     | Cell membrane          | Member of the repulsive guidance molecule family that contributes to the patterning of the developing nervous system. Acts as a BMP coreceptor that potentiates BMP signaling.                                                                                                                                       |
| <i>NEGR1</i>   |      |          | F,G,H,I            | 2,3     | Cell membrane          | May be involved in cell-adhesion. May function as a trans-neural growth-promoting factor in regenerative axon sprouting in the mammalian brain.                                                                                                                                                                      |
| <i>NEGR1</i>   |      |          | F,G,H,I            |         |                        |                                                                                                                                                                                                                                                                                                                      |
| <i>CCDC126</i> |      |          | C,F,G,H,I          | 1,8     | Secreted               |                                                                                                                                                                                                                                                                                                                      |
| <i>AGRN</i>    | 0.37 |          | F,G,H,I            |         | Secreted               | Glycoprotein that plays a central role in the formation and the maintenance of the neuromuscular junction and directs key events in postsynaptic differentiation.                                                                                                                                                    |
| <i>LEAP2</i>   |      |          | F,G,H,I            | 2,8     | Secreted               | Has an antimicrobial activity.                                                                                                                                                                                                                                                                                       |
| <i>MYOC</i>    | 0.47 |          | F,G,H,I            |         | Secreted               | Secreted glycoprotein regulating the activation of different signaling pathways in adjacent cells to control different processes including cell adhesion, cell-matrix adhesion, cytoskeleton organization and cell migration.                                                                                        |
| <i>IL18R1</i>  | 0.53 |          | A,C,F,G,H,I        | 2,3,8   | Membrane               | Responsible for the binding of the pro-inflammatory cytokine IL18. Contributes to IL18-induced cytokine production, either independently or as a complex with SLC12A3.                                                                                                                                               |
| <i>PTPRS</i>   | 0.38 | DDA      | F',G,H             | 1,2,8   | Cell membrane          | Cell surface receptor that binds to glycosaminoglycans, including chondroitin sulfate proteoglycans and heparan sulfate proteoglycan.                                                                                                                                                                                |
| <i>HMGCS1</i>  |      |          | G'                 | 1,8     | Cytoplasm              | Catalyzes the condensation of acetyl-CoA with acetoacetyl-CoA to form HMG-CoA, which is converted by HMG-CoA reductase into mevalonate, a precursor for cholesterol synthesis.                                                                                                                                       |
| <i>PSAT1</i>   |      |          | F,G,H,I            | 2       |                        | Catalyzes the reversible conversion of 3-phosphohydroxypyruvate to phosphoserine and of 3-hydroxy-2-oxo-4-phosphonooxybutanoate to phosphohydroxythreonine.                                                                                                                                                          |
| <i>THBS2</i>   | 0.49 | DDA, MRM | A,B,C,D,E,F, G,H,I | 1,3,8   |                        | Adhesive glycoprotein that mediates cell-to-cell and cell-to-matrix interactions. Ligand for CD36 mediating antiangiogenic properties.                                                                                                                                                                               |
| <i>LRRC15</i>  |      |          | C,F,G,H,I          | 8       | Cell membrane          |                                                                                                                                                                                                                                                                                                                      |
| <i>DCUN1D1</i> |      |          | F',G'              | 2       | Nucleus, cytoplasm     | Part of an E3 ubiquitin ligase complex for neddylation. Promotes neddylation of cullin components of E3 cullin-RING ubiquitin ligase complexes.                                                                                                                                                                      |
| <i>GPD1</i>    |      |          | F,G,H,I            | 1,8     | Cytoplasm              | Has glycerol-3-phosphate dehydrogenase activity.                                                                                                                                                                                                                                                                     |
| <i>CADM2</i>   |      |          | F',G',H,I          | 2       | Cell membrane          | Adhesion molecule that engages in homo- and heterophilic interactions with the other nectin-like family members, leading to cell aggregation.                                                                                                                                                                        |
| <i>EPHB6</i>   | 0.47 |          | A,C,D,F,G,H,I      | 3,9     | Membrane               | Kinase-defective receptor for members of the ephrin-B family. Modulates cell adhesion and migration by exerting both positive and negative effects upon stimulation with ephrin-B2.                                                                                                                                  |
| <i>AKR1D1</i>  |      |          | G',H               |         | Cytoplasm              | Catalyzes the stereospecific NADPH-dependent reduction of the C4-C5 double bond of bile acid intermediates and steroid hormones carrying a delta(4)-3-one structure to yield an A/B cis-ring junction. This cis-configuration is crucial for bile acid biosynthesis and plays important roles in steroid metabolism. |
| <i>TNFSF12</i> | 0.52 |          | A,C,F,G,H,I        | 2,8     | Cell membrane          | Mediates NF-kappa-B activation. Promotes angiogenesis and the proliferation of endothelial cells. Also involved in induction of inflammatory cytokines. Promotes IL8 secretion.                                                                                                                                      |

|                      |      |     |                 |                |                          |                                                                                                                                                                                                                                                                                                                          |
|----------------------|------|-----|-----------------|----------------|--------------------------|--------------------------------------------------------------------------------------------------------------------------------------------------------------------------------------------------------------------------------------------------------------------------------------------------------------------------|
| <i>LMAN2</i>         |      |     | F',G'           | 2              | Endoplasmic reticulum    | Plays a role as an intracellular lectin in the early secretory pathway. Involved in the transport and sorting of glycoproteins carrying high mannose-type glycans.                                                                                                                                                       |
| <i>GPR56</i>         | 0.11 |     | F,G,H           | 2              | Cell membrane            | Receptor involved in cell adhesion and probably in cell-cell interactions. Mediates cell matrix adhesion in developing neurons and hematopoietic stem cells.                                                                                                                                                             |
| <i>COL11A2</i>       |      |     | C,F,G,H,I       | 2,8            | Secreted                 | May play an important role in fibrillogenesis by controlling lateral growth of collagen II fibrils.                                                                                                                                                                                                                      |
| <i>HTRA1</i>         |      |     | F,G,H,I         | 2              | Secreted, cell membrane  | Serine protease with various targets, including ECM proteins like fibronectin. May degrade proteoglycans, thereby releasing soluble FGF-glycosaminoglycan complexes that promote the range and intensity of FGF signals in the extracellular space. Regulates the availability of IGFs by cleaving IGF-binding proteins. |
| <i>AGER</i>          | 0.54 |     | C,D,F,G,H,I     | 3,8            | Cell membrane            | Mediates interactions of advanced glycosylation end products which plays a role in regulating production/expression of TNF $\alpha$ , oxidative stress, and endothelial dysfunction in T2 diabetes.                                                                                                                      |
| <i>SLITRK6</i>       | 0.38 |     | F,G,H,I         |                | Cell membrane            | Regulator of neurite outgrowth required for normal hearing and vision.                                                                                                                                                                                                                                                   |
| <i>AKR1C4</i>        | 0.09 |     | F,G,H,I         | 2              | Cytoplasm, cytosol       | Cytosolic aldo-keto reductase that catalyzes the NADH and NADPH-dependent reduction of ketosteroids to hydroxysteroids.                                                                                                                                                                                                  |
| <i>SERPINB1</i><br>3 |      |     | F,G,H,I         |                | Cytoplasm                | May play a role in the proliferation or differentiation of keratinocytes.                                                                                                                                                                                                                                                |
| <i>LGALS3BP</i>      |      |     | D',E,F,G,H,I    | 1,2,3,8,9      | Secreted                 | Promotes integrin-mediated cell adhesion. May stimulate host defense against viruses and tumor cells.                                                                                                                                                                                                                    |
| <i>NPTXR</i>         | 0.61 |     | A,F,G,H,I       | 2,8            | Membrane                 | May be involved in mediating uptake of synaptic material during synapse remodeling, or synaptic clustering of AMPA glutamate receptors at a subset of excitatory synapses.                                                                                                                                               |
| <i>IL1RN</i>         | 0.64 |     | A,C,E,F,G,H,I   | 3,7,11         | Secreted                 | Anti-inflammatory antagonist of interleukin-1 family. Protects from immune dysregulation and uncontrolled systemic inflammation triggered by IL1.                                                                                                                                                                        |
| <i>TNFAIP6</i>       |      |     | B,C,D,E,F,G,H,I | 2,3,8,9        | Secreted                 | Major regulator of ECM organization during tissue remodeling.                                                                                                                                                                                                                                                            |
| <i>MPO</i>           | 0.54 | MRM | A,C,E,F,G,H,I   |                | Lysosome                 | Part of the host defense system of polymorphonuclear leukocytes. Mediates the proteolytic cleavage of alpha-1-microglobulin to form t-alpha-1-microglobulin, which potently inhibits oxidation of low-density lipoprotein particles and limits vascular damage.                                                          |
| <i>SLC35G2</i>       |      |     | C',F',G'        | 2              | Cell membrane            | May play a role in cell proliferation.                                                                                                                                                                                                                                                                                   |
| <i>EHMT2</i>         |      |     | C',F',G'        | 1,3,8          | Nucleus                  | Histone methyltransferase that specifically mono- and dimethylates 'Lys-9' of histone H3 (H3K9me1 and H3K9me2, respectively) in euchromatin. Also required for DNA methylation.                                                                                                                                          |
| <i>FAM20B</i>        |      |     | C',F,G,H,I      | 2,8            | Golgi apparatus membrane | Responsible for the 2-O-phosphorylation of xylose in the glycosaminoglycan-protein linkage region of proteoglycans thereby regulating the amount of mature GAG chains.                                                                                                                                                   |
| <i>ANTXR2</i>        |      |     | F,G,H,I         | 2              | Endoplasmic reticulum    | Necessary for cellular interactions with laminin and the ECM.                                                                                                                                                                                                                                                            |
| <i>AMY2A</i>         | 0.75 |     | F,G,H,I         |                | Secreted                 |                                                                                                                                                                                                                                                                                                                          |
| <i>STX1A</i>         |      |     | F',G'           | 2,8            | Cytoplasmic vesicle      | Essential for hormone and neurotransmitter calcium-dependent exocytosis and endocytosis. Also involved in the exocytosis of hormones such as insulin or glucagon-like peptide 1.                                                                                                                                         |
| <i>CTHRC1</i>        |      |     | F',G'           | 8              | Secreted                 | May act as a negative regulator of collagen matrix deposition.                                                                                                                                                                                                                                                           |
| <i>PLAT</i>          | 0.66 |     | A,F,G,H         | 1,2,3,6,7,8,11 | Secreted                 | By controlling plasmin-mediated proteolysis, it plays an important role in tissue remodeling and degradation, in cell migration and many other physiopathological events.                                                                                                                                                |

|                  |      |          |                   |           |                                |                                                                                                                                                                                                                                                                          |
|------------------|------|----------|-------------------|-----------|--------------------------------|--------------------------------------------------------------------------------------------------------------------------------------------------------------------------------------------------------------------------------------------------------------------------|
| <i>VOPPI</i>     |      |          | F',G,H,I          | 1,2,8     | Cytoplasmic vesicle membrane   | Increases the transcriptional activity of NFkB1 by facilitating its nuclear translocation, DNA-binding and associated apoptotic response, when overexpressed.                                                                                                            |
| <i>PCOLCE</i>    | 0.58 | DDA      | A,C,F,G,H,I       |           | Secreted                       | Binds to the C-terminal propeptide of type I procollagen and enhances procollagen C-proteinase activity.                                                                                                                                                                 |
| <i>ANTXR1</i>    |      |          | F',G',H           | 1,8       | Cell membrane                  | Plays a role in cell attachment and migration. Interacts with ECM proteins and with the actin cytoskeleton. Mediates adhesion of cells to type 1 collagen and gelatin, reorganization of the actin cytoskeleton and promotes cell spreading.                             |
| <i>KITLG</i>     | 0.58 |          | A',C',F',G'       | 2         | Cell membrane                  | Ligand for the receptor-type protein-tyrosine kinase KIT. Plays an essential role in the regulation of cell survival and proliferation, hematopoiesis, stem cell maintenance, gametogenesis, mast cell development, migration and function, and in melanogenesis.        |
| <i>ARL15</i>     |      |          | G'                |           |                                |                                                                                                                                                                                                                                                                          |
| <i>APLP1</i>     | 0.77 |          | F',G,H            | 2,8       | Cell membrane                  | May play a role in postsynaptic function. The C-terminal gamma-secretase processed fragment, ALID1, activates transcription activation through APBB1 (Fe65) binding.                                                                                                     |
| <i>APOM</i>      | 0.36 | DDA      | A,C,F,G,H,I       | 1,3,8     | Secreted                       | Probably involved in lipid transport. Can bind sphingosine-1-phosphate, myristic acid, palmitic acid and stearic acid, retinol, all-trans-retinoic acid and 9-cis-retinoic acid.                                                                                         |
| <i>EFNB2</i>     |      |          | F',G,H            | 3         | Cell membrane                  | Cell surface transmembrane ligand for Eph receptors, a family tyrosine kinases crucial for migration, repulsion and adhesion during neuronal, vascular and epithelial development.                                                                                       |
| <i>SERPINA11</i> | 0.60 | DDA      | A,F,G,H,I         |           | Secreted                       |                                                                                                                                                                                                                                                                          |
| <i>DSG2</i>      | 0.48 | DDA      | A,C,F,G,H,I       | 1,2,8     | Cell membrane                  | Component of intercellular desmosome junctions. Involved in the interaction of plaque proteins and intermediate filaments mediating cell-cell adhesion.                                                                                                                  |
| <i>ADAMTSL1</i>  |      |          | F,G,H             | 2         | Secreted                       |                                                                                                                                                                                                                                                                          |
| <i>DNAJB9</i>    |      |          | C',F',G,H         | 8         | Endoplasmic reticulum lumen    | Co-chaperone for Hsp70 protein HSPA5/BiP, a key repressor of the ERN1/IRE1-mediated unfolded protein response. J domain-containing co-chaperones stimulate the ATPase activity of Hsp70 proteins and are required for efficient substrate recognition by Hsp70 proteins. |
| <i>IGFBP1</i>    | 0.83 | DDA, MRM | A,D',F,G,H,I      | 1,3,8     | Secreted                       | Prolong the half-life of the IGFs and have been shown to either inhibit or stimulate the growth promoting effects of the IGFs on cell culture. Promotes cell migration.                                                                                                  |
| <i>ART3</i>      | 0.63 | MRM      | A,C,F,G,H,I       | 1,8       | Cell membrane                  |                                                                                                                                                                                                                                                                          |
| <i>LEP</i>       | 0.94 | DDA, MRM | G,H               | 1,3,8     | Secreted                       | Key player in the regulation of energy balance and body weight control.                                                                                                                                                                                                  |
| <i>SEZ6L</i>     | 0.54 |          | F,G,H,I           |           | Endoplasmic reticulum membrane | May contribute to specialized endoplasmic reticulum functions in neurons.                                                                                                                                                                                                |
| <i>WFIKK2</i>    | 0.56 | MRM      | A,B,C,D,E,F,G,H,I | 1,2,3,8,9 | Secreted                       | Protease-inhibitor that contains multiple distinct protease inhibitor domains. Might have serine- and metallo-protease-inhibitor activity. Inhibits the activity of mature myostatin.                                                                                    |
| <i>PTPRD</i>     |      |          | G'                | 8         | Membrane                       | Bidirectionally induces pre- and post-synaptic neuron differentiation. Involved in pre-synaptic differentiation through interaction with SLITRK2.                                                                                                                        |
| <i>PCDH10</i>    |      |          | G,H,I             |           | Cell membrane                  | Potential calcium-dependent cell-adhesion protein.                                                                                                                                                                                                                       |

|                 |      |     |                      |         |                    |                                                                                                                                                                                                |
|-----------------|------|-----|----------------------|---------|--------------------|------------------------------------------------------------------------------------------------------------------------------------------------------------------------------------------------|
| <i>AZGP1</i>    |      |     | C',F,G,H,I           |         | Secreted           | Stimulates lipid degradation in adipocytes. Causes fat losses associated with some cancers.                                                                                                    |
| <i>AMY2B</i>    | 0.70 |     | A,F,G,H,I            | 8       | Secreted           |                                                                                                                                                                                                |
| <i>SIGLEC12</i> |      |     | C',F',G'             | 2       | Membrane           | Putative adhesion molecule that mediates sialic-acid dependent binding to cells.                                                                                                               |
| <i>SLITRK1</i>  |      |     | G,H                  | 2,8     | Membrane, secreted | It is involved in synaptogenesis and promotes excitatory synapse differentiation. Enhances neuronal dendrite outgrowth.                                                                        |
| <i>PRSS1</i>    |      |     | F',G,H               | 3,8,9   | Secreted           | Has activity against the synthetic substrates Boc-Phe-Ser-Arg-Mec, Boc-Leu-Thr-Arg-Mec, Boc-Gln-Ala-Arg-Mec and Boc-Val-Pro-Arg-Mec.                                                           |
| <i>NCAN</i>     | 0.60 |     | F,G,H                |         | Secreted           | May modulate neuronal adhesion and neurite growth during development by binding to neural cell adhesion molecules.                                                                             |
| <i>OMG</i>      | 0.77 |     | F,G,H                | 2       | Cell membrane      | Cell adhesion molecule contributing to the interactive process required for myelination in the central nervous system.                                                                         |
| <i>IGFBP4</i>   | 0.11 | DDA | A,G,H,I              | 1,3,8   | Secreted           | Prolongs IGF half-life. Either inhibits or stimulates the growth promoting effects of the IGFs on cell culture. Alters the interaction of IGFs with their cell surface receptors.              |
| <i>SLITRK5</i>  |      |     | F,G,H,I              | 3,8,9   | Membrane           | Suppresses neurite outgrowth.                                                                                                                                                                  |
| <i>ST3GAL1</i>  | 0.03 |     | A,C,F,G,H,I          | 1,2,8   | Golgi apparatus    | Involved in terminal sialylation of glycoproteins and glycolipids.                                                                                                                             |
| <i>TLL1</i>     |      |     | C',F',G,H            | 8       | Secreted           | Protease which processes procollagen C-propeptides, such as chordin.                                                                                                                           |
| <i>MET</i>      | 0.52 | MRM | A,B',C',D',E,F,G,H,I | 3,8,9   | Membrane           | Receptor tyrosine kinase that transduces signals from the ECM to the cytoplasm by binding to hepatocyte growth factor/ -ligand. Regulates proliferation, scattering, morphogenesis & survival. |
| <i>HS6ST3</i>   |      |     | F,G,H,I              | 2       | Membrane           | 6-O-sulfation enzyme which catalyzes the transfer of sulfate from 3'-phosphoadenosine 5'-phosphosulfate (PAPS) to position 6 of the N-sulfoglucosamine residue of heparan sulfate.             |
| <i>F9</i>       | 0.46 | DDA | F',G                 | 2,3,8,9 | Secreted           | Participates in the intrinsic blood coagulation pathway by converting factor X to its active form in the presence of Ca(2+) ions, phospholipids, and factor VIIIa.                             |

**SUPPLEMENTAL TABLE 3: Plasma proteins associated with incident type 2 diabetes in the CHS cohort stratified by sex with test for interaction (Col C, E-I, Repeated aptamer information excluded to ease viewing)**

| Gene Symbol      | Sex Interaction<br>p <sub>fd</sub> * <sup>*</sup> | Male (N = 987. incl. 154 cases) |         | Female (N = 1.644. incl. 256 cases) |         |
|------------------|---------------------------------------------------|---------------------------------|---------|-------------------------------------|---------|
|                  |                                                   | HR (95% CI)                     | p-value | HR (95% CI)                         | p-value |
| <i>NEU1</i>      | 0.173                                             | 1.11 (1.00–1.23)                | 5.6E-02 | 1.38 (1.26–1.52)                    | 5.1E-11 |
| <i>HS6ST3</i>    | 0.173                                             | 0.58 (0.46–0.72)                | 8.5E-07 | 0.86 (0.74–1.00)                    | 5.2E-02 |
| <i>APOF</i>      | 0.369                                             | 0.73 (0.61–0.88)                | 7.3E-04 | 0.60 (0.52–0.68)                    | 4.9E-15 |
| <i>AGRN</i>      | 0.369                                             | 1.18 (1.01–1.38)                | 3.6E-02 | 1.48 (1.31–1.68)                    | 4.6E-10 |
| <i>ADAMTSL1</i>  | 0.369                                             | 0.89 (0.74–1.07)                | 2.0E-01 | 0.70 (0.61–0.80)                    | 2.1E-07 |
| <i>IGFBP2</i>    | 0.512                                             | 0.72 (0.59–0.88)                | 1.3E-03 | 0.58 (0.50–0.67)                    | 3.3E-13 |
| <i>EFNB2</i>     | 0.721                                             | 0.81 (0.65–1.00)                | 5.1E-02 | 0.69 (0.58–0.82)                    | 2.5E-05 |
| <i>OMG</i>       | 0.721                                             | 0.70 (0.59–0.83)                | 5.2E-05 | 0.84 (0.74–0.96)                    | 1.2E-02 |
| <i>TIMP4</i>     | 0.721                                             | 0.88 (0.72–1.08)                | 2.2E-01 | 0.71 (0.61–0.82)                    | 2.2E-06 |
| <i>APLP1</i>     | 0.721                                             | 0.67 (0.57–0.79)                | 2.4E-06 | 0.82 (0.73–0.93)                    | 1.6E-03 |
| <i>ACY1</i>      | 0.756                                             | 1.60 (1.37–1.88)                | 7.6E-09 | 1.32 (1.18–1.47)                    | 8.7E-07 |
| <i>TNFSF12</i>   | 0.756                                             | 0.59 (0.45–0.77)                | 1.1E-04 | 0.76 (0.64–0.90)                    | 1.4E-03 |
| <i>MXRA8</i>     | 0.762                                             | 0.66 (0.54–0.80)                | 2.8E-05 | 0.56 (0.48–0.64)                    | 1.1E-14 |
| <i>VOPP1</i>     | 0.762                                             | 0.81 (0.66–1.00)                | 4.7E-02 | 0.67 (0.57–0.78)                    | 4.9E-07 |
| <i>SLITRK1</i>   | 0.762                                             | 0.81 (0.66–1.00)                | 4.9E-02 | 0.70 (0.60–0.82)                    | 1.3E-05 |
| <i>SLITRK6</i>   | 0.762                                             | 0.79 (0.63–0.98)                | 3.2E-02 | 0.67 (0.57–0.79)                    | 3.4E-06 |
| <i>TGFBR3</i>    | 0.762                                             | 0.76 (0.63–0.92)                | 4.9E-03 | 0.68 (0.59–0.78)                    | 3.6E-08 |
| <i>THBS2</i>     | 0.762                                             | 1.42 (1.20–1.68)                | 3.5E-05 | 1.26 (1.12–1.42)                    | 1.7E-04 |
| <i>AGER</i>      | 0.762                                             | 0.80 (0.67–0.95)                | 9.2E-03 | 0.72 (0.63–0.83)                    | 2.8E-06 |
| <i>EPHB6</i>     | 0.762                                             | 0.74 (0.60–0.93)                | 8.5E-03 | 0.66 (0.55–0.79)                    | 4.4E-06 |
| <i>SERPINA11</i> | 0.762                                             | 0.87 (0.72–1.05)                | 1.4E-01 | 0.72 (0.63–0.83)                    | 5.9E-06 |
| <i>ADH4</i>      | 0.809                                             | 1.43 (1.22–1.68)                | 7.5E-06 | 1.25 (1.12–1.39)                    | 7.0E-05 |
| <i>HRSP12</i>    | 0.815                                             | 1.45 (1.23–1.70)                | 5.9E-06 | 1.32 (1.18–1.49)                    | 3.5E-06 |
| <i>PSAT1</i>     | 0.815                                             | 1.40 (1.18–1.65)                | 7.8E-05 | 1.23 (1.09–1.37)                    | 4.0E-04 |
| <i>AKR1C4</i>    | 0.815                                             | 1.34 (1.16–1.54)                | 8.9E-05 | 1.21 (1.07–1.36)                    | 1.6E-03 |
| <i>ARL15</i>     | 0.815                                             | 1.13 (0.96–1.31)                | 1.3E-01 | 1.27 (1.15–1.40)                    | 2.8E-06 |
| <i>SIGLEC12</i>  | 0.815                                             | 1.16 (0.98–1.38)                | 8.2E-02 | 1.29 (1.16–1.44)                    | 2.9E-06 |
| <i>PCDH10</i>    | 0.815                                             | 0.74 (0.60–0.92)                | 6.2E-03 | 0.69 (0.58–0.81)                    | 9.1E-06 |
| <i>PCOLCE</i>    | 0.832                                             | 0.70 (0.59–0.84)                | 7.6E-05 | 0.84 (0.74–0.96)                    | 1.1E-02 |
| <i>STX1A</i>     | 0.832                                             | 0.78 (0.63–0.96)                | 1.8E-02 | 0.69 (0.59–0.81)                    | 3.3E-06 |
| <i>SLITRK5</i>   | 0.832                                             | 0.81 (0.67–0.98)                | 3.3E-02 | 0.74 (0.64–0.86)                    | 5.8E-05 |
| <i>ART3</i>      | 0.832                                             | 0.75 (0.61–0.91)                | 3.2E-03 | 0.70 (0.60–0.81)                    | 3.2E-06 |
| <i>FTCD</i>      | 0.832                                             | 1.23 (1.04–1.45)                | 1.7E-02 | 1.38 (1.22–1.56)                    | 2.2E-07 |
| <i>WFIKKN2</i>   | 0.888                                             | 0.68 (0.57–0.82)                | 7.1E-05 | 0.78 (0.69–0.89)                    | 2.2E-04 |
| <i>LGALS3BP</i>  | 0.888                                             | 1.20 (1.01–1.41)                | 3.3E-02 | 1.34 (1.19–1.51)                    | 2.3E-06 |
| <i>TNFAIP6</i>   | 0.888                                             | 0.81 (0.67–0.97)                | 2.5E-02 | 0.73 (0.64–0.84)                    | 1.9E-05 |

|                  |       |                  |         |                  |         |
|------------------|-------|------------------|---------|------------------|---------|
| <i>DCUN1D1</i>   | 0.905 | 1.19 (1.04–1.37) | 1.2E-02 | 1.32 (1.20–1.45) | 4.5E-09 |
| <i>PTPRD</i>     | 0.905 | 0.69 (0.57–0.82) | 5.0E-05 | 0.80 (0.70–0.92) | 1.2E-03 |
| <i>ASL</i>       | 0.906 | 1.38 (1.17–1.64) | 1.4E-04 | 1.21 (1.08–1.34) | 6.3E-04 |
| <i>APOM</i>      | 0.913 | 0.74 (0.62–0.89) | 1.3E-03 | 0.78 (0.68–0.88) | 9.7E-05 |
| <i>ANTXR1</i>    | 0.913 | 0.81 (0.67–0.98) | 2.7E-02 | 0.72 (0.62–0.82) | 2.8E-06 |
| <i>DNAJB9</i>    | 0.913 | 1.35 (1.15–1.60) | 3.1E-04 | 1.26 (1.11–1.44) | 4.0E-04 |
| <i>COL11A2</i>   | 0.913 | 0.83 (0.68–1.01) | 6.9E-02 | 0.77 (0.68–0.87) | 2.9E-05 |
| <i>CESI</i>      | 0.913 | 1.42 (1.20–1.69) | 6.1E-05 | 1.30 (1.16–1.47) | 7.9E-06 |
| <i>NPTXR</i>     | 0.913 | 0.67 (0.55–0.82) | 7.7E-05 | 0.75 (0.65–0.86) | 4.9E-05 |
| <i>ANTXR2</i>    | 0.913 | 0.74 (0.62–0.88) | 7.5E-04 | 0.75 (0.65–0.86) | 5.4E-05 |
| <i>NCAN</i>      | 0.913 | 0.74 (0.63–0.88) | 6.9E-04 | 0.80 (0.70–0.92) | 1.5E-03 |
| <i>UNC5D</i>     | 0.913 | 0.65 (0.54–0.79) | 1.9E-05 | 0.65 (0.56–0.76) | 1.5E-08 |
| <i>MYOC</i>      | 0.913 | 0.69 (0.57–0.82) | 5.1E-05 | 0.78 (0.68–0.90) | 4.8E-04 |
| <i>ALDOB</i>     | 0.913 | 1.36 (1.15–1.61) | 3.7E-04 | 1.26 (1.13–1.41) | 5.3E-05 |
| <i>SERPINB13</i> | 0.913 | 0.76 (0.62–0.94) | 1.2E-02 | 0.71 (0.59–0.84) | 1.1E-04 |
| <i>SEZ6L</i>     | 0.913 | 0.68 (0.57–0.82) | 5.8E-05 | 0.77 (0.67–0.88) | 1.7E-04 |
| <i>MPO</i>       | 0.913 | 1.17 (0.99–1.39) | 6.3E-02 | 1.32 (1.17–1.50) | 1.1E-05 |
| <i>MET</i>       | 0.913 | 0.75 (0.63–0.88) | 5.2E-04 | 0.82 (0.72–0.93) | 1.8E-03 |
| <i>ADIPOQ</i>    | 0.913 | 0.67 (0.55–0.83) | 1.5E-04 | 0.63 (0.55–0.72) | 9.6E-11 |
| <i>F9</i>        | 0.913 | 1.39 (1.11–1.73) | 3.6E-03 | 1.29 (1.11–1.49) | 8.4E-04 |
| <i>SHBG</i>      | 0.913 | 0.72 (0.58–0.90) | 4.0E-03 | 0.65 (0.57–0.74) | 6.5E-11 |
| <i>RTN4R</i>     | 0.913 | 1.41 (1.17–1.70) | 3.4E-04 | 1.37 (1.20–1.56) | 2.1E-06 |
| <i>ASGR1</i>     | 0.913 | 1.36 (1.17–1.59) | 8.5E-05 | 1.33 (1.18–1.49) | 1.6E-06 |
| <i>PTPRS</i>     | 0.913 | 0.77 (0.65–0.92) | 3.8E-03 | 0.74 (0.65–0.84) | 5.8E-06 |
| <i>TLL1</i>      | 0.913 | 1.23 (1.05–1.45) | 1.0E-02 | 1.30 (1.13–1.50) | 3.1E-04 |
| <i>INHBC</i>     | 0.913 | 1.43 (1.18–1.73) | 2.3E-04 | 1.55 (1.35–1.77) | 2.0E-10 |
| <i>LRRC15</i>    | 0.913 | 0.79 (0.65–0.95) | 1.5E-02 | 0.75 (0.66–0.86) | 2.1E-05 |
| <i>NEGR1</i>     | 0.913 | 0.72 (0.59–0.88) | 1.2E-03 | 0.69 (0.59–0.80) | 1.6E-06 |
| <i>FAM20B</i>    | 0.913 | 0.77 (0.62–0.94) | 9.8E-03 | 0.71 (0.61–0.82) | 4.8E-06 |
| <i>FBP1</i>      | 0.913 | 1.41 (1.21–1.64) | 8.4E-06 | 1.27 (1.14–1.41) | 1.1E-05 |
| <i>LMAN2</i>     | 0.913 | 1.31 (1.09–1.57) | 4.4E-03 | 1.38 (1.22–1.57) | 2.6E-07 |
| <i>SCG3</i>      | 0.913 | 0.64 (0.54–0.77) | 1.9E-06 | 0.70 (0.61–0.80) | 2.4E-07 |
| <i>LEP</i>       | 0.913 | 1.36 (1.11–1.66) | 3.1E-03 | 1.56 (1.29–1.89) | 5.5E-06 |
| <i>PLXNB2</i>    | 0.913 | 1.46 (1.19–1.78) | 2.3E-04 | 1.31 (1.12–1.53) | 5.6E-04 |
| <i>KITLG</i>     | 0.913 | 0.74 (0.61–0.88) | 1.0E-03 | 0.80 (0.70–0.92) | 1.2E-03 |
| <i>CHAD</i>      | 0.917 | 0.77 (0.64–0.94) | 8.4E-03 | 0.74 (0.65–0.84) | 2.2E-06 |
| <i>SLC35G2</i>   | 0.917 | 1.29 (1.10–1.52) | 2.1E-03 | 1.19 (1.09–1.31) | 1.2E-04 |
| <i>AKR1D1</i>    | 0.917 | 1.20 (1.06–1.35) | 2.8E-03 | 1.26 (1.14–1.40) | 1.3E-05 |
| <i>SLITRK3</i>   | 0.917 | 0.67 (0.57–0.79) | 1.9E-06 | 0.71 (0.62–0.81) | 4.8E-07 |
| <i>GUSB</i>      | 0.917 | 1.51 (1.26–1.82) | 9.0E-06 | 1.57 (1.38–1.79) | 1.3E-11 |
| <i>RGMB</i>      | 0.917 | 0.66 (0.54–0.80) | 2.8E-05 | 0.68 (0.58–0.80) | 2.7E-06 |
| <i>CHRDLI</i>    | 0.917 | 0.66 (0.53–0.81) | 1.3E-04 | 0.67 (0.57–0.78) | 8.4E-07 |



|                 |       |                  |         |                  |         |
|-----------------|-------|------------------|---------|------------------|---------|
| <i>GPD1</i>     | 0.919 | 1.36 (1.16–1.60) | 1.9E-04 | 1.38 (1.22–1.57) | 5.1E-07 |
| <i>ADH1A</i>    | 0.919 | 1.38 (1.18–1.60) | 4.0E-05 | 1.32 (1.19–1.46) | 1.0E-07 |
| <i>RBP5</i>     | 0.919 | 1.33 (1.16–1.52) | 3.5E-05 | 1.36 (1.21–1.53) | 2.2E-07 |
| <i>PLAT</i>     | 0.919 | 1.30 (1.08–1.56) | 5.9E-03 | 1.39 (1.21–1.59) | 2.3E-06 |
| <i>GHR</i>      | 0.919 | 1.47 (1.20–1.81) | 2.4E-04 | 1.48 (1.28–1.70) | 5.0E-08 |
| <i>PTPRU</i>    | 0.919 | 1.38 (1.21–1.57) | 1.0E-06 | 1.34 (1.23–1.47) | 1.8E-10 |
| <i>AZGP1</i>    | 0.919 | 0.79 (0.65–0.97) | 2.6E-02 | 0.80 (0.73–0.88) | 6.3E-06 |
| <i>DSG2</i>     | 0.919 | 0.76 (0.64–0.90) | 1.7E-03 | 0.81 (0.71–0.92) | 1.5E-03 |
| <i>IL18R1</i>   | 0.920 | 1.23 (1.06–1.44) | 7.7E-03 | 1.22 (1.11–1.33) | 1.6E-05 |
| <i>IL1RN</i>    | 0.921 | 1.16 (1.03–1.31) | 1.4E-02 | 1.22 (1.12–1.32) | 3.4E-06 |
| <i>ST3GAL1</i>  | 0.921 | 0.76 (0.61–0.94) | 1.2E-02 | 0.72 (0.61–0.86) | 1.5E-04 |
| <i>EHMT2</i>    | 0.922 | 0.76 (0.63–0.92) | 4.5E-03 | 0.71 (0.61–0.81) | 1.5E-06 |
| <i>HMGCS1</i>   | 0.953 | 1.34 (1.13–1.60) | 9.6E-04 | 1.26 (1.12–1.42) | 1.4E-04 |
| <i>ADSSL1</i>   | 0.953 | 1.28 (1.12–1.46) | 2.3E-04 | 1.28 (1.15–1.44) | 1.7E-05 |
| <i>LEAP2</i>    | 0.953 | 1.31 (1.11–1.55) | 1.3E-03 | 1.38 (1.21–1.59) | 3.5E-06 |
| <i>SORD</i>     | 0.965 | 1.37 (1.15–1.64) | 5.3E-04 | 1.30 (1.15–1.46) | 3.2E-05 |
| <i>HTRA1</i>    | 0.970 | 1.32 (1.15–1.53) | 1.4E-04 | 1.31 (1.17–1.47) | 2.9E-06 |
| <i>ADH1C</i>    | 0.973 | 1.35 (1.15–1.58) | 2.0E-04 | 1.31 (1.17–1.47) | 3.4E-06 |
| <i>AMY2B</i>    | 0.973 | 0.75 (0.63–0.89) | 1.0E-03 | 0.76 (0.67–0.87) | 7.8E-05 |
| <i>GPR56</i>    | 0.973 | 1.24 (1.11–1.39) | 1.7E-04 | 1.23 (1.09–1.38) | 8.6E-04 |
| <i>AMY2A</i>    | 0.973 | 0.72 (0.61–0.86) | 2.0E-04 | 0.74 (0.65–0.84) | 4.7E-06 |
| <i>IGFBP1</i>   | 0.973 | 0.72 (0.62–0.84) | 4.8E-05 | 0.77 (0.68–0.87) | 2.4E-05 |
| <i>IGFBP4</i>   | 0.973 | 1.27 (1.05–1.53) | 1.2E-02 | 1.29 (1.13–1.47) | 1.7E-04 |
| <i>PRSS1</i>    | 0.973 | 0.75 (0.64–0.88) | 5.0E-04 | 0.78 (0.68–0.91) | 1.0E-03 |
| <i>CRTAC1</i>   | 0.973 | 0.77 (0.65–0.91) | 2.4E-03 | 0.76 (0.67–0.87) | 5.9E-05 |
| <i>PRCP</i>     | 0.973 | 1.55 (1.27–1.88) | 1.0E-05 | 1.53 (1.34–1.76) | 1.0E-09 |
| <i>ADAMTSL2</i> | 0.973 | 1.35 (1.16–1.59) | 1.8E-04 | 1.37 (1.23–1.54) | 3.8E-08 |
| <i>CCDC126</i>  | 0.973 | 0.69 (0.58–0.83) | 7.8E-05 | 0.70 (0.61–0.80) | 3.3E-07 |
| <i>NFASC</i>    | 0.973 | 1.23 (1.08–1.40) | 1.6E-03 | 1.22 (1.10–1.35) | 9.2E-05 |
| <i>CADM2</i>    | 0.983 | 0.64 (0.52–0.79) | 4.2E-05 | 0.70 (0.60–0.81) | 3.4E-06 |
| <i>CPM</i>      | 0.983 | 1.36 (1.18–1.56) | 1.3E-05 | 1.37 (1.21–1.56) | 4.8E-07 |

**SUPPLEMENTAL TABLE 4: Plasma proteins associated with longitudinal fasting glucose in the CHS cohort (Columns C, E-L)**

| Gene Symbol   | Estimate (95% CI)*    | p-value         | Estimate (95% CI)†    | p-value         | Spearman rho‡ | MS-verified | pQTL evidence    | Supporting literature |
|---------------|-----------------------|-----------------|-----------------------|-----------------|---------------|-------------|------------------|-----------------------|
| <i>APOM</i>   | −2.15 (−2.96 ; −1.33) | <b>2,52E-07</b> | −1.54 (−2.38 ; −0.70) | 3,45E-04        | 0.36          | DDA         | A,C,F,G,H,I      | 1,3,8                 |
| <i>FABP3</i>  | 2.44 (1.39 ; 3.48)    | <b>5,49E-06</b> | 1.18 (−0.01 ; 2.37)   | 4,21E-04        |               |             | F',G',I          | 3,8                   |
| <i>GUSB</i>   | 2.21 (1.34 ; 3.08)    | <b>6,52E-07</b> | 1.61 (0.72 ; 2.51)    | 4,08E-04        | 0.88          |             | F,G,H,I          |                       |
| <i>GHR</i>    | 2.34 (1.45 ; 3.23)    | <b>2,74E-07</b> | 1.74 (0.80 ; 2.69)    | 3,00E-04        |               |             | C,E,F,G,H,I      | 1,3,4,8               |
| <i>CPM</i>    | 2.09 (1.24 ; 2.94)    | <b>1,57E-06</b> | 1.69 (0.83 ; 2.55)    | 1,27E-04        | 0.74          | DDA         | A,F,G,H,I        | 1,2,8                 |
| <i>IGFBP2</i> | −2.50 (−3.42 ; −1.59) | <b>9,03E-08</b> | −1.77 (−2.78 ; −0.76) | 4,21E-04        | 0.76          | DDA         | G,H              | 1,2,3,4,6,8,9,10,11   |
| <i>PRCP</i>   | 2.61 (1.72 ; 3.50)    | <b>8,89E-09</b> | 2.19 (1.30 ; 3.08)    | <b>1,64E-06</b> | 0.68          |             | A,C,F,G,H,I      | 2,8                   |
| <i>INHBC</i>  | 2.23 (1.42 ; 3.04)    | <b>6,58E-08</b> | 1.52 (0.64 ; 2.39)    | 4,21E-04        | 0.40          | DDA         | A,C',G,H,I       | 1,2,8                 |
| <i>IL18R1</i> | 1.93 (1.10 ; 2.77)    | <b>5,38E-06</b> | 1.72 (0.89 ; 2.55)    | 4,99E-05        | 0.53          |             | A,C,F,G,H,I      | 2,3,8                 |
| <i>APOF</i>   | −3.09 (−3.99 ; −2.20) | <b>1,53E-11</b> | −2.43 (−3.39 ; −1.46) | <b>8,88E-07</b> |               |             | C,F,G,H,I        | 1,2,8                 |
| <i>ADIPOQ</i> | −2.34 (−3.23 ; −1.45) | <b>2,60E-07</b> | −1.69 (−2.60 ; −0.77) | 3,15E-04        |               |             | D',F,G,H,I       | 1,3,4,5,8,9           |
| <i>PTPRU</i>  | 2.19 (1.35 ; 3.02)    | <b>3,41E-07</b> | 1.73 (0.88 ; 2.59)    | 6,72E-05        |               |             | G'               | 1,8                   |
| <i>HTRA1</i>  | 1.85 (1.05 ; 2.66)    | <b>6,01E-06</b> | 1.13 (0.29 ; 1.97)    | 4,21E-04        |               |             | F,G,H,I          | 2                     |
| <i>MXRA8</i>  | −2.17 (−3.01 ; −1.33) | <b>4,42E-07</b> | −1.47 (−2.35 ; −0.6)  | 4,21E-04        |               |             | F,G,H,I          | 1,2,8                 |
| <i>CHRDLI</i> | −2.14 (−3.08 ; −1.19) | <b>9,53E-06</b> | −1.58 (−2.56 ; −0.61) | 4,21E-04        | 0.33          | DDA         | F,G              | 3,8,9                 |
| <i>RTN4R</i>  | 2.52 (1.68 ; 3.37)    | <b>5,70E-09</b> | 2.03 (1.16 ; 2.91)    | <b>5,29E-06</b> | 0.65          |             | A,C,D',E,F,G,H,I | 1,3,8                 |
| <i>TMEM9</i>  | 1.80 (1.00 ; 2.59)    | <b>9,61E-06</b> | 1.82 (1.03 ; 2.61)    | <b>5,89E-06</b> |               |             | F,G,H            |                       |

**SUPPLEMENTAL TABLE 4: Plasma proteins associated with longitudinal fasting glucose in the CHS cohort (Columns C, M, N)**

| Gene Symbol   | Subcellular location    | Function                                                                                                                                                                                                                                                                                                                                                                                         |
|---------------|-------------------------|--------------------------------------------------------------------------------------------------------------------------------------------------------------------------------------------------------------------------------------------------------------------------------------------------------------------------------------------------------------------------------------------------|
| <i>APOM</i>   | Secreted                | Probably involved in lipid transport. Can bind sphingosine-1-phosphate, myristic acid, palmitic acid and stearic acid, retinol, all-trans-retinoic acid and 9-cis-retinoic acid.                                                                                                                                                                                                                 |
| <i>FABP3</i>  | Cytoplasm               | FABP are thought to play a role in the intracellular transport of long-chain fatty acids and their acyl-CoA esters.                                                                                                                                                                                                                                                                              |
| <i>GUSB</i>   | Lysosome                | Plays an important role in the degradation of dermatan and keratan sulfates.                                                                                                                                                                                                                                                                                                                     |
| <i>GHR</i>    | Cell membrane           | Receptor for pituitary gland growth hormone involved in regulating postnatal body growth. The soluble form (GHBP) acts as a reservoir of growth hormone in plasma and may be a modulator/inhibitor of GH signaling.                                                                                                                                                                              |
| <i>CPM</i>    | Cell membrane           | Specifically removes C-terminal basic residues (Arg or Lys) from peptides and proteins. It is believed to play important roles in the control of peptide hormone and growth factor activity at the cell surface, and in the membrane-localized degradation of extracellular proteins.                                                                                                            |
| <i>IGFBP2</i> | Secreted                | Prolongs the half-life of the IGFs and have been shown to either inhibit or stimulate the growth promoting effects of the IGFs on cell culture. Alters the interaction of IGFs with their cell surface receptors.                                                                                                                                                                                |
| <i>PRCP</i>   | Lysosome                | Cleaves C-terminal amino acids linked to proline in peptides such as angiotensin II, III and des-Arg9-bradykinin.                                                                                                                                                                                                                                                                                |
| <i>INHBC</i>  | Secreted                | Inhibits the secretion of follitropin by the pituitary gland. Involved in regulation of a number of diverse functions such as hypothalamic and pituitary hormone secretion, gonadal hormone secretion, insulin secretion, nerve cell survival, depending on their subunit composition.                                                                                                           |
| <i>IL18R1</i> | Membrane                | Responsible for the binding of the pro-inflammatory cytokine IL18. Contributes to IL18-induced cytokine production, either independently of SLC12A3, or as a complex with SLC12A3.                                                                                                                                                                                                               |
| <i>APOF</i>   | Secreted                | Associates with LDL. Inhibits cholesteryl ester transfer protein activity and appears to be an important regulator of cholesterol transport.                                                                                                                                                                                                                                                     |
| <i>ADIPOQ</i> | Secreted                | Involved in the control of fat metabolism and insulin sensitivity, with direct anti-diabetic, anti-atherogenic and anti-inflammatory activities. Stimulates AMPK phosphorylation and activation in the liver and skeletal muscle, enhancing glucose utilization and fatty-acid combustion.                                                                                                       |
| <i>PTPRU</i>  | Cell junction           | Tyrosine-protein phosphatase which dephosphorylates CTNNB1. May function in cell proliferation and migration and play a role in the maintenance of epithelial integrity.                                                                                                                                                                                                                         |
| <i>HTRA1</i>  | Secreted, cell membrane | Serine protease with a variety of targets, including ECM proteins such as fibronectin. May also degrade proteoglycans. Through cleavage of proteoglycans, may release soluble FGF-glycosaminoglycan complexes that promote the range and intensity of FGF signals in the extracellular space. Regulates the availability of insulin-like growth factors (IGFs) by cleaving IGF-binding proteins. |
| <i>MXRA8</i>  | Cell membrane           | Transmembrane protein which can modulate activity of various signaling pathways, probably via binding to integrin. Mediates heterophilic cell-cell interactions in vitro.                                                                                                                                                                                                                        |
| <i>CHRD1</i>  | Secreted                | Antagonizes BMP4 function by binding to it and preventing its interaction with receptors. Alters the fate commitment of neural stem cells from gliogenesis to neurogenesis. Contributes to neuronal differentiation of neural stem cells by preventing the adoption of a glial fate.                                                                                                             |
| <i>RTN4R</i>  | Cell membrane           | Receptor for RTN4, OMG and MAG. Functions as receptor for the sialylated gangliosides GT1b and GM1. Functions as receptor for chondroitin sulfate proteoglycans. Can also bind heparin.                                                                                                                                                                                                          |
| <i>TMEM9</i>  | Lysosome, membrane      | Transmembrane protein that binds to and facilitates the assembly of lysosomal proton-transporting V-type ATPase, resulting in enhanced lysosomal acidification and trafficking.                                                                                                                                                                                                                  |

**SUPPLEMENTAL TABLE 5: Plasma proteins associated with IVGTT traits in the HERITAGE cohort (Columns D, F-O)**

| Gene Symbol     | Insulin sensitivity ( $S_I$ ) |       |              |                   |                | Acute insulin response to glucose ( $AIR_G$ ) |       |              |                   |                |
|-----------------|-------------------------------|-------|--------------|-------------------|----------------|-----------------------------------------------|-------|--------------|-------------------|----------------|
|                 | N                             | Beta* | p*           | Beta <sup>†</sup> | p <sup>†</sup> | N                                             | Beta* | p*           | Beta <sup>†</sup> | p <sup>†</sup> |
| <i>MXRA8</i>    | 670                           | 0,45  | <b>1E-20</b> | 0,29              | <b>1E-09</b>   | 672                                           | -0,10 | 5E-02        | 0,00              | 1E+00          |
| <i>PTPRU</i>    | 670                           | -0,27 | <b>2E-09</b> | -0,16             | <b>2E-04</b>   | 672                                           | 0,06  | 2E-01        | 0,00              | 9E-01          |
| <i>GUSB</i>     | 670                           | -0,34 | <b>2E-13</b> | -0,21             | <b>2E-06</b>   | 672                                           | 0,04  | 4E-01        | -0,03             | 5E-01          |
| <i>PRCP</i>     | 670                           | -0,14 | <b>3E-03</b> | -0,05             | 3E-01          | 672                                           | -0,03 | 6E-01        | -0,07             | 1E-01          |
| <i>ACY1</i>     | 668                           | -0,36 | <b>6E-15</b> | -0,25             | <b>7E-09</b>   | 670                                           | 0,13  | <b>4E-03</b> | 0,07              | 1E-01          |
| <i>APOF</i>     | 670                           | 0,50  | <b>7E-26</b> | 0,33              | <b>1E-11</b>   | 672                                           | -0,23 | <b>1E-06</b> | -0,15             | <b>4E-03</b>   |
| <i>IGFBP2</i>   | 670                           | 0,59  | <b>1E-33</b> | 0,44              | <b>9E-18</b>   | 672                                           | -0,22 | <b>6E-06</b> | -0,14             | <b>1E-02</b>   |
| <i>ADIPOQ</i>   | 670                           | 0,40  | <b>2E-15</b> | 0,24              | <b>1E-06</b>   | 672                                           | -0,10 | 5E-02        | 0,00              | 1E+00          |
| <i>HRSP12</i>   | 668                           | -0,21 | <b>7E-07</b> | -0,16             | <b>5E-05</b>   | 670                                           | 0,07  | 1E-01        | 0,04              | 3E-01          |
| <i>RBP5</i>     | 669                           | -0,26 | <b>1E-08</b> | -0,19             | <b>6E-06</b>   | 671                                           | 0,06  | 2E-01        | 0,03              | 6E-01          |
| <i>CPM</i>      | 670                           | -0,26 | <b>5E-08</b> | -0,15             | <b>1E-03</b>   | 672                                           | 0,06  | 2E-01        | 0,00              | 1E+00          |
| <i>INHBC</i>    | 670                           | -0,24 | <b>9E-08</b> | -0,12             | <b>5E-03</b>   | 672                                           | 0,09  | <b>4E-02</b> | 0,03              | 5E-01          |
| <i>ADH1A</i>    | 670                           | -0,31 | <b>2E-13</b> | -0,22             | <b>4E-08</b>   | 672                                           | 0,14  | <b>8E-04</b> | 0,09              | <b>3E-02</b>   |
| <i>SHBG</i>     | 669                           | 0,34  | <b>7E-11</b> | 0,13              | <b>1E-02</b>   | 671                                           | -0,18 | <b>6E-04</b> | -0,08             | 1E-01          |
| <i>GHR</i>      | 670                           | -0,39 | <b>3E-17</b> | -0,22             | <b>2E-06</b>   | 672                                           | 0,13  | <b>3E-03</b> | 0,04              | 4E-01          |
| <i>CHRD1</i>    | 670                           | 0,24  | <b>2E-07</b> | 0,10              | <b>2E-02</b>   | 672                                           | -0,14 | <b>2E-03</b> | -0,07             | 1E-01          |
| <i>ASGR1</i>    | 669                           | -0,17 | <b>5E-04</b> | -0,11             | <b>1E-02</b>   | 671                                           | -0,01 | 9E-01        | -0,04             | 4E-01          |
| <i>FBP1</i>     | 666                           | -0,31 | <b>2E-11</b> | -0,21             | <b>1E-06</b>   | 668                                           | 0,10  | <b>2E-02</b> | 0,05              | 3E-01          |
| <i>ADAMTSL2</i> | 669                           | -0,20 | <b>8E-06</b> | -0,13             | <b>1E-03</b>   | 671                                           | -0,06 | 2E-01        | -0,10             | <b>2E-02</b>   |
| <i>SCG3</i>     | 670                           | 0,35  | <b>2E-11</b> | 0,10              | 6E-02          | 672                                           | -0,10 | 5E-02        | 0,04              | 5E-01          |
| <i>SLITRK3</i>  | 670                           | 0,43  | <b>5E-20</b> | 0,26              | <b>6E-08</b>   | 672                                           | -0,17 | <b>2E-04</b> | -0,08             | 1E-01          |
| <i>TGFBR3</i>   | 670                           | 0,37  | <b>5E-15</b> | 0,24              | <b>3E-07</b>   | 672                                           | -0,17 | <b>3E-04</b> | -0,10             | <b>4E-02</b>   |
| <i>CES1</i>     | 670                           | -0,23 | <b>1E-06</b> | -0,13             | <b>4E-03</b>   | 672                                           | 0,03  | 5E-01        | -0,03             | 6E-01          |
| <i>ADH1C</i>    | 670                           | -0,23 | <b>6E-07</b> | -0,17             | <b>3E-05</b>   | 672                                           | 0,07  | 1E-01        | 0,04              | 3E-01          |
| <i>UNC5D</i>    | 670                           | 0,30  | <b>4E-10</b> | 0,09              | 9E-02          | 672                                           | -0,09 | 5E-02        | 0,03              | 6E-01          |
| <i>RTN4R</i>    | 670                           | -0,26 | <b>2E-08</b> | -0,13             | <b>2E-03</b>   | 672                                           | -0,01 | 9E-01        | -0,07             | 1E-01          |
| <i>ADSSL1</i>   | 669                           | -0,19 | <b>3E-05</b> | -0,10             | <b>2E-02</b>   | 671                                           | 0,05  | 3E-01        | 0,01              | 9E-01          |
| <i>ALDOB</i>    | 668                           | -0,28 | <b>7E-10</b> | -0,19             | <b>1E-05</b>   | 670                                           | 0,10  | <b>3E-02</b> | 0,05              | 3E-01          |
| <i>CHAD</i>     | 670                           | 0,26  | <b>1E-06</b> | 0,13              | <b>1E-02</b>   | 672                                           | -0,06 | 2E-01        | 0,01              | 9E-01          |
| <i>PLXNB2</i>   | 670                           | 0,11  | <b>2E-02</b> | 0,07              | 8E-02          | 672                                           | -0,14 | <b>3E-03</b> | -0,12             | <b>9E-03</b>   |
| <i>TIMP4</i>    | 670                           | 0,00  | 1E+00        | 0,06              | 2E-01          | 672                                           | 0,19  | <b>7E-05</b> | 0,16              | <b>6E-04</b>   |
| <i>ASL</i>      | 668                           | -0,26 | <b>3E-09</b> | -0,18             | <b>7E-06</b>   | 670                                           | 0,11  | <b>9E-03</b> | 0,08              | 8E-02          |
| <i>NFASC</i>    | 669                           | -0,04 | 4E-01        | -0,08             | 6E-02          | 671                                           | -0,08 | 8E-02        | -0,06             | 2E-01          |
| <i>ADH4</i>     | 669                           | -0,36 | <b>7E-17</b> | -0,25             | <b>8E-10</b>   | 671                                           | 0,17  | <b>1E-04</b> | 0,11              | <b>1E-02</b>   |
| <i>NEU1</i>     | 669                           | -0,23 | <b>8E-07</b> | -0,20             | <b>5E-06</b>   | 671                                           | 0,03  | 5E-01        | 0,01              | 8E-01          |
| <i>CRTAC1</i>   | 670                           | 0,23  | <b>1E-06</b> | 0,14              | <b>1E-03</b>   | 672                                           | -0,06 | 2E-01        | -0,02             | 7E-01          |
| <i>SORD</i>     | 669                           | -0,23 | <b>3E-07</b> | -0,18             | <b>9E-06</b>   | 671                                           | 0,09  | <b>3E-02</b> | 0,07              | 9E-02          |
| <i>FTCD</i>     | 667                           | -0,18 | <b>7E-05</b> | -0,15             | <b>2E-04</b>   | 670                                           | 0,03  | 6E-01        | 0,01              | 8E-01          |
| <i>RGMB</i>     | 670                           | 0,32  | <b>5E-10</b> | 0,16              | <b>9E-04</b>   | 672                                           | -0,10 | <b>4E-02</b> | -0,02             | 7E-01          |
| <i>NEGR1</i>    | 669                           | 0,31  | <b>7E-11</b> | 0,21              | <b>3E-06</b>   | 671                                           | -0,09 | 5E-02        | -0,04             | 4E-01          |
| <i>CCDC126</i>  | 670                           | 0,38  | <b>2E-15</b> | 0,21              | <b>8E-06</b>   | 672                                           | -0,11 | <b>2E-02</b> | -0,02             | 7E-01          |
| <i>AGRN</i>     | 670                           | -0,18 | <b>3E-04</b> | -0,09             | <b>4E-02</b>   | 672                                           | -0,03 | 5E-01        | -0,08             | 9E-02          |
| <i>LEAP2</i>    | 670                           | 0,01  | 8E-01        | 0,02              | 5E-01          | 672                                           | 0,03  | 6E-01        | 0,02              | 7E-01          |

|                  |     |       |              |       |              |     |       |              |       |              |
|------------------|-----|-------|--------------|-------|--------------|-----|-------|--------------|-------|--------------|
| <i>MYOC</i>      | 670 | 0,09  | 6E-02        | 0,06  | 2E-01        | 672 | 0,03  | 6E-01        | 0,04  | 4E-01        |
| <i>IL18R1</i>    | 670 | -0,09 | <b>4E-02</b> | -0,07 | 1E-01        | 672 | -0,05 | 2E-01        | -0,06 | 1E-01        |
| <i>PTPRS</i>     | 670 | 0,28  | <b>4E-10</b> | 0,20  | <b>2E-06</b> | 672 | -0,09 | <b>3E-02</b> | -0,05 | 3E-01        |
| <i>HMGC51</i>    | 669 | -0,06 | 2E-01        | -0,12 | <b>9E-03</b> | 671 | -0,01 | 8E-01        | 0,02  | 7E-01        |
| <i>PSAT1</i>     | 670 | -0,32 | <b>1E-13</b> | -0,24 | <b>2E-09</b> | 672 | 0,12  | <b>4E-03</b> | 0,08  | 5E-02        |
| <i>THBS2</i>     | 669 | 0,08  | 7E-02        | 0,01  | 7E-01        | 671 | -0,21 | <b>4E-06</b> | -0,18 | <b>9E-05</b> |
| <i>LRRC15</i>    | 668 | 0,16  | <b>2E-03</b> | 0,08  | 9E-02        | 670 | -0,01 | 9E-01        | 0,04  | 4E-01        |
| <i>DCUN1D1</i>   | 669 | -0,19 | <b>3E-05</b> | -0,07 | 8E-02        | 671 | 0,08  | 7E-02        | 0,03  | 6E-01        |
| <i>GPD1</i>      | 670 | -0,32 | <b>1E-13</b> | -0,17 | <b>9E-05</b> | 672 | 0,11  | <b>9E-03</b> | 0,03  | 5E-01        |
| <i>CADM2</i>     | 668 | 0,29  | <b>2E-09</b> | 0,10  | 5E-02        | 670 | -0,11 | <b>2E-02</b> | -0,01 | 9E-01        |
| <i>EPHB6</i>     | 669 | 0,31  | <b>6E-09</b> | 0,14  | <b>7E-03</b> | 671 | -0,10 | 6E-02        | -0,01 | 9E-01        |
| <i>AKR1D1</i>    | 670 | -0,27 | <b>8E-11</b> | -0,21 | <b>1E-07</b> | 672 | 0,09  | <b>3E-02</b> | 0,05  | 2E-01        |
| <i>TNFSF12</i>   | 668 | 0,22  | <b>8E-07</b> | 0,11  | <b>9E-03</b> | 670 | -0,09 | <b>4E-02</b> | -0,03 | 5E-01        |
| <i>LMAN2</i>     | 668 | -0,19 | <b>4E-05</b> | -0,11 | <b>1E-02</b> | 670 | 0,10  | <b>3E-02</b> | 0,06  | 2E-01        |
| <i>GPR56</i>     | 669 | -0,07 | 1E-01        | -0,05 | 2E-01        | 671 | -0,03 | 4E-01        | -0,05 | 3E-01        |
| <i>COL11A2</i>   | 669 | 0,20  | <b>2E-04</b> | 0,05  | 4E-01        | 671 | -0,11 | <b>4E-02</b> | -0,03 | 6E-01        |
| <i>HTRA1</i>     | 669 | -0,30 | <b>1E-11</b> | -0,16 | <b>2E-04</b> | 671 | 0,07  | 1E-01        | -0,01 | 8E-01        |
| <i>AGER</i>      | 670 | 0,24  | <b>6E-06</b> | 0,05  | 3E-01        | 672 | -0,07 | 2E-01        | 0,03  | 6E-01        |
| <i>SLITRK6</i>   | 669 | 0,24  | <b>2E-07</b> | 0,15  | <b>4E-04</b> | 671 | -0,08 | 9E-02        | -0,03 | 5E-01        |
| <i>AKR1C4</i>    | 668 | -0,25 | <b>2E-08</b> | -0,18 | <b>8E-06</b> | 670 | 0,10  | <b>3E-02</b> | 0,06  | 2E-01        |
| <i>SERPINB13</i> | 668 | 0,25  | <b>1E-07</b> | 0,13  | <b>5E-03</b> | 670 | -0,05 | 3E-01        | 0,01  | 9E-01        |
| <i>LGALS3BP</i>  | 670 | -0,33 | <b>3E-12</b> | -0,20 | <b>7E-06</b> | 672 | 0,07  | 1E-01        | 0,00  | 1E+00        |
| <i>NPTXR</i>     | 670 | 0,21  | <b>3E-05</b> | 0,01  | 9E-01        | 672 | -0,05 | 3E-01        | 0,05  | 3E-01        |
| <i>IL1RN</i>     | 669 | -0,35 | <b>1E-14</b> | -0,17 | <b>3E-04</b> | 671 | 0,14  | <b>2E-03</b> | 0,05  | 4E-01        |
| <i>TNFAIP6</i>   | 669 | 0,23  | <b>1E-06</b> | 0,07  | 1E-01        | 671 | -0,16 | <b>6E-04</b> | -0,09 | 7E-02        |
| <i>MPO</i>       | 670 | 0,01  | 8E-01        | 0,04  | 4E-01        | 672 | 0,01  | 8E-01        | 0,00  | 9E-01        |
| <i>SLC35G2</i>   | 670 | -0,21 | <b>7E-06</b> | -0,12 | <b>6E-03</b> | 672 | 0,09  | 5E-02        | 0,05  | 3E-01        |
| <i>EHMT2</i>     | 669 | 0,38  | <b>5E-17</b> | 0,22  | <b>8E-07</b> | 671 | -0,16 | <b>3E-04</b> | -0,08 | 7E-02        |
| <i>FAM20B</i>    | 670 | 0,27  | <b>1E-09</b> | 0,15  | <b>2E-04</b> | 672 | -0,13 | <b>4E-03</b> | -0,07 | 1E-01        |
| <i>ANTXR2</i>    | 670 | 0,37  | <b>1E-16</b> | 0,25  | <b>6E-09</b> | 672 | -0,15 | <b>5E-04</b> | -0,10 | <b>4E-02</b> |
| <i>AMY2A</i>     | 669 | 0,22  | <b>4E-06</b> | 0,07  | 1E-01        | 671 | -0,02 | 7E-01        | 0,06  | 2E-01        |
| <i>STX1A</i>     | 668 | 0,29  | <b>1E-10</b> | 0,17  | <b>1E-04</b> | 670 | -0,08 | 6E-02        | -0,01 | 8E-01        |
| <i>CTHRC1</i>    | 670 | 0,20  | <b>1E-05</b> | 0,12  | <b>5E-03</b> | 672 | -0,05 | 3E-01        | -0,01 | 8E-01        |
| <i>PLAT</i>      | 670 | -0,13 | <b>1E-02</b> | 0,00  | 9E-01        | 672 | 0,04  | 4E-01        | -0,02 | 7E-01        |
| <i>VOPPI</i>     | 670 | 0,38  | <b>1E-16</b> | 0,20  | <b>4E-05</b> | 672 | -0,15 | <b>9E-04</b> | -0,06 | 3E-01        |
| <i>PCOLCE</i>    | 669 | 0,19  | <b>5E-05</b> | 0,12  | <b>7E-03</b> | 671 | -0,04 | 4E-01        | 0,00  | 9E-01        |
| <i>ANTXR1</i>    | 670 | 0,36  | <b>9E-15</b> | 0,21  | <b>3E-06</b> | 672 | -0,15 | <b>1E-03</b> | -0,07 | 1E-01        |
| <i>KITLG</i>     | 668 | 0,24  | <b>4E-08</b> | 0,16  | <b>8E-05</b> | 670 | -0,02 | 6E-01        | 0,02  | 6E-01        |
| <i>ARL15</i>     | 669 | -0,21 | <b>2E-06</b> | -0,08 | 7E-02        | 671 | 0,06  | 2E-01        | -0,01 | 8E-01        |
| <i>APLP1</i>     | 670 | 0,32  | <b>4E-11</b> | 0,11  | <b>2E-02</b> | 672 | -0,09 | 6E-02        | 0,03  | 6E-01        |
| <i>APOM</i>      | 669 | 0,11  | <b>2E-02</b> | 0,06  | 1E-01        | 671 | 0,06  | 2E-01        | 0,08  | 7E-02        |
| <i>EFNB2</i>     | 670 | 0,20  | <b>5E-05</b> | 0,10  | <b>3E-02</b> | 672 | -0,12 | <b>1E-02</b> | -0,08 | 1E-01        |
| <i>SERPINA11</i> | 670 | 0,16  | <b>9E-04</b> | 0,05  | 2E-01        | 672 | -0,08 | 1E-01        | -0,02 | 6E-01        |
| <i>DSG2</i>      | 670 | 0,34  | <b>4E-13</b> | 0,20  | <b>7E-06</b> | 672 | -0,10 | <b>4E-02</b> | -0,02 | 6E-01        |
| <i>ADAMTSL1</i>  | 670 | 0,30  | <b>4E-10</b> | 0,13  | <b>4E-03</b> | 672 | -0,17 | <b>2E-04</b> | -0,10 | 5E-02        |
| <i>DNAJB9</i>    | 670 | -0,26 | <b>2E-08</b> | -0,12 | <b>4E-03</b> | 672 | 0,02  | 6E-01        | -0,05 | 3E-01        |
| <i>IGFBP1</i>    | 668 | 0,57  | <b>7E-33</b> | 0,38  | <b>5E-12</b> | 670 | -0,40 | <b>1E-17</b> | -0,40 | <b>1E-11</b> |
| <i>ART3</i>      | 670 | 0,31  | <b>4E-10</b> | 0,11  | <b>3E-02</b> | 672 | -0,10 | <b>4E-02</b> | 0,01  | 9E-01        |
| <i>LEP</i>       | 670 | -0,72 | <b>4E-32</b> | -0,48 | <b>6E-11</b> | 672 | 0,50  | <b>4E-17</b> | 0,50  | <b>4E-11</b> |

|                 |     |       |              |       |              |     |       |              |       |              |
|-----------------|-----|-------|--------------|-------|--------------|-----|-------|--------------|-------|--------------|
| <i>SEZ6L</i>    | 670 | 0,35  | <b>2E-11</b> | 0,08  | 2E-01        | 672 | -0,11 | <b>4E-02</b> | 0,05  | 4E-01        |
| <i>WFIKKN2</i>  | 670 | 0,33  | <b>1E-12</b> | 0,14  | <b>4E-03</b> | 671 | -0,13 | <b>4E-03</b> | -0,03 | 5E-01        |
| <i>PTPRD</i>    | 670 | 0,29  | <b>7E-09</b> | 0,07  | 2E-01        | 672 | -0,13 | <b>6E-03</b> | -0,03 | 6E-01        |
| <i>PCDH10</i>   | 669 | 0,27  | <b>3E-08</b> | 0,06  | 2E-01        | 671 | -0,06 | 2E-01        | 0,05  | 3E-01        |
| <i>AZGP1</i>    | 669 | 0,32  | <b>2E-10</b> | 0,19  | <b>9E-05</b> | 671 | -0,08 | 1E-01        | -0,01 | 8E-01        |
| <i>AMY2B</i>    | 670 | 0,21  | <b>1E-05</b> | 0,06  | 2E-01        | 672 | -0,03 | 6E-01        | 0,06  | 3E-01        |
| <i>SIGLEC12</i> | 669 | -0,23 | <b>3E-07</b> | -0,15 | <b>2E-04</b> | 671 | 0,07  | 1E-01        | 0,03  | 5E-01        |
| <i>SLITRK1</i>  | 669 | 0,28  | <b>2E-09</b> | 0,09  | 7E-02        | 671 | -0,05 | 3E-01        | 0,06  | 2E-01        |
| <i>PRSS1</i>    | 669 | 0,19  | <b>1E-04</b> | 0,07  | 1E-01        | 671 | -0,07 | 2E-01        | -0,01 | 8E-01        |
| <i>NCAN</i>     | 670 | 0,27  | <b>5E-08</b> | 0,04  | 4E-01        | 672 | -0,16 | <b>1E-03</b> | -0,05 | 4E-01        |
| <i>OMG</i>      | 670 | 0,13  | <b>6E-03</b> | -0,02 | 7E-01        | 672 | -0,02 | 7E-01        | 0,06  | 2E-01        |
| <i>IGFBP4</i>   | 669 | -0,21 | <b>8E-07</b> | -0,11 | <b>5E-03</b> | 671 | 0,06  | 1E-01        | 0,01  | 8E-01        |
| <i>SLITRK5</i>  | 670 | 0,20  | <b>2E-05</b> | 0,08  | 9E-02        | 672 | -0,12 | <b>9E-03</b> | -0,06 | 2E-01        |
| <i>ST3GAL1</i>  | 669 | 0,28  | <b>2E-09</b> | 0,13  | <b>4E-03</b> | 671 | -0,14 | <b>2E-03</b> | -0,07 | 1E-01        |
| <i>TLL1</i>     | 669 | 0,01  | 9E-01        | -0,03 | 4E-01        | 671 | -0,02 | 6E-01        | -0,01 | 9E-01        |
| <i>MET</i>      | 670 | 0,27  | <b>2E-08</b> | 0,20  | <b>2E-06</b> | 672 | -0,19 | <b>3E-05</b> | -0,17 | <b>3E-04</b> |
| <i>HS6ST3</i>   | 670 | 0,35  | <b>7E-12</b> | 0,10  | 7E-02        | 672 | -0,14 | <b>6E-03</b> | -0,01 | 9E-01        |
| <i>F9</i>       | 670 | -0,26 | <b>1E-09</b> | -0,13 | <b>3E-03</b> | 672 | 0,07  | 1E-01        | -0,01 | 9E-01        |
| <i>TMEM9</i>    | 668 | 0,00  | 9E-01        | -0,04 | 3E-01        | 670 | -0,01 | 8E-01        | 0,01  | 8E-01        |
| <i>FABP3</i>    | 670 | -0,45 | <b>8E-18</b> | -0,14 | <b>2E-02</b> | 672 | 0,27  | <b>9E-08</b> | 0,17  | <b>1E-02</b> |

**SUPPLEMENTAL TABLE 5: Plasma proteins associated with IVGTT traits in the HERITAGE cohort (Columns D, P-Y)**

| Gene Symbol     | Disposition index (DI) |       |              |                   |                | Glucose effectiveness (S <sub>G</sub> ) |        |              |                   |                |
|-----------------|------------------------|-------|--------------|-------------------|----------------|-----------------------------------------|--------|--------------|-------------------|----------------|
|                 | N                      | Beta* | p*           | Beta <sup>†</sup> | p <sup>†</sup> | N                                       | Beta*  | p*           | Beta <sup>†</sup> | p <sup>†</sup> |
| <i>MXRA8</i>    | 665                    | 0,35  | <b>2E-09</b> | 0,28              | <b>6E-06</b>   | 677                                     | 4E-03  | <b>6E-03</b> | 4E-03             | <b>1E-02</b>   |
| <i>PTPRU</i>    | 665                    | -0,21 | <b>7E-05</b> | -0,15             | <b>5E-03</b>   | 677                                     | 3E-03  | 6E-02        | 4E-03             | <b>2E-02</b>   |
| <i>GUSB</i>     | 665                    | -0,31 | <b>1E-08</b> | -0,25             | <b>5E-06</b>   | 677                                     | -4E-03 | <b>1E-02</b> | -4E-03            | <b>1E-02</b>   |
| <i>PRCP</i>     | 665                    | -0,18 | <b>2E-03</b> | -0,14             | <b>1E-02</b>   | 677                                     | 1E-03  | 5E-01        | 1E-03             | 4E-01          |
| <i>ACY1</i>     | 663                    | -0,23 | <b>2E-05</b> | -0,18             | <b>1E-03</b>   | 675                                     | 5E-04  | 7E-01        | 7E-04             | 7E-01          |
| <i>APOF</i>     | 665                    | 0,27  | <b>2E-06</b> | 0,18              | <b>4E-03</b>   | 677                                     | -1E-03 | 4E-01        | -3E-03            | 1E-01          |
| <i>IGFBP2</i>   | 665                    | 0,39  | <b>1E-11</b> | 0,33              | <b>5E-07</b>   | 677                                     | 2E-03  | 2E-01        | 1E-03             | 5E-01          |
| <i>ADIPOQ</i>   | 665                    | 0,30  | <b>4E-07</b> | 0,23              | <b>2E-04</b>   | 677                                     | 4E-03  | <b>1E-02</b> | 4E-03             | <b>1E-02</b>   |
| <i>HRSP12</i>   | 663                    | -0,14 | <b>6E-03</b> | -0,11             | <b>3E-02</b>   | 675                                     | -4E-05 | 1E+00        | 3E-04             | 8E-01          |
| <i>RBP5</i>     | 664                    | -0,19 | <b>3E-04</b> | -0,16             | <b>2E-03</b>   | 676                                     | 7E-04  | 7E-01        | 9E-04             | 6E-01          |
| <i>CPM</i>      | 665                    | -0,21 | <b>1E-04</b> | -0,16             | <b>6E-03</b>   | 677                                     | -2E-03 | 1E-01        | -2E-03            | 2E-01          |
| <i>INHBC</i>    | 665                    | -0,14 | <b>8E-03</b> | -0,07             | 2E-01          | 677                                     | -1E-03 | 4E-01        | -7E-04            | 7E-01          |
| <i>ADH1A</i>    | 665                    | -0,17 | <b>7E-04</b> | -0,13             | <b>1E-02</b>   | 677                                     | 2E-03  | 2E-01        | 2E-03             | 2E-01          |
| <i>SHBG</i>     | 664                    | 0,20  | <b>2E-03</b> | 0,08              | 2E-01          | 676                                     | 2E-03  | 3E-01        | 1E-03             | 6E-01          |
| <i>GHR</i>      | 665                    | -0,28 | <b>2E-07</b> | -0,21             | <b>4E-04</b>   | 677                                     | -1E-03 | 4E-01        | -9E-04            | 6E-01          |
| <i>CHRD1</i>    | 665                    | 0,10  | 6E-02        | 0,03              | 6E-01          | 677                                     | 2E-03  | 2E-01        | 2E-03             | 2E-01          |
| <i>ASGR1</i>    | 664                    | -0,17 | <b>3E-03</b> | -0,14             | <b>1E-02</b>   | 676                                     | -2E-03 | 2E-01        | -2E-03            | 2E-01          |
| <i>FBP1</i>     | 661                    | -0,21 | <b>1E-04</b> | -0,17             | <b>3E-03</b>   | 673                                     | 1E-03  | 5E-01        | 1E-03             | 4E-01          |
| <i>ADAMTSL2</i> | 664                    | -0,23 | <b>2E-05</b> | -0,20             | <b>2E-04</b>   | 676                                     | 6E-04  | 7E-01        | 8E-04             | 6E-01          |
| <i>SCG3</i>     | 665                    | 0,25  | <b>3E-05</b> | 0,14              | <b>4E-02</b>   | 677                                     | 2E-03  | 3E-01        | 2E-03             | 4E-01          |
| <i>SLITRK3</i>  | 665                    | 0,25  | <b>5E-06</b> | 0,17              | <b>5E-03</b>   | 677                                     | -6E-04 | 7E-01        | -1E-03            | 4E-01          |
| <i>TGFBR3</i>   | 665                    | 0,21  | <b>3E-04</b> | 0,14              | <b>2E-02</b>   | 677                                     | -2E-04 | 9E-01        | -6E-04            | 7E-01          |

|                  |     |       |              |       |              |     |        |              |        |              |
|------------------|-----|-------|--------------|-------|--------------|-----|--------|--------------|--------|--------------|
| <i>CESI</i>      | 665 | -0,21 | <b>2E-04</b> | -0,16 | <b>4E-03</b> | 677 | -5E-04 | 8E-01        | -3E-04 | 9E-01        |
| <i>ADH1C</i>     | 665 | -0,16 | <b>3E-03</b> | -0,13 | <b>1E-02</b> | 677 | 2E-03  | 3E-01        | 2E-03  | 2E-01        |
| <i>UNC5D</i>     | 665 | 0,21  | <b>2E-04</b> | 0,11  | 9E-02        | 677 | 4E-04  | 8E-01        | -3E-06 | 1E+00        |
| <i>RTN4R</i>     | 665 | -0,25 | <b>4E-06</b> | -0,19 | <b>6E-04</b> | 677 | -3E-03 | 5E-02        | -2E-03 | 1E-01        |
| <i>ADSSL1</i>    | 664 | -0,16 | <b>4E-03</b> | -0,11 | 5E-02        | 676 | 1E-03  | 4E-01        | 2E-03  | 3E-01        |
| <i>ALDOB</i>     | 663 | -0,18 | <b>7E-04</b> | -0,13 | <b>1E-02</b> | 675 | 2E-03  | 2E-01        | 2E-03  | 1E-01        |
| <i>CHAD</i>      | 665 | 0,19  | <b>2E-03</b> | 0,13  | <b>4E-02</b> | 677 | -2E-03 | 2E-01        | -3E-03 | 2E-01        |
| <i>PLXNB2</i>    | 665 | -0,02 | 8E-01        | -0,04 | 4E-01        | 677 | 1E-03  | 4E-01        | 1E-03  | 5E-01        |
| <i>TIMP4</i>     | 665 | 0,19  | <b>7E-04</b> | 0,23  | <b>6E-05</b> | 677 | 3E-03  | 6E-02        | 3E-03  | 7E-02        |
| <i>ASL</i>       | 663 | -0,15 | <b>5E-03</b> | -0,10 | 5E-02        | 675 | 2E-04  | 9E-01        | 6E-04  | 7E-01        |
| <i>NFASC</i>     | 664 | -0,08 | 1E-01        | -0,11 | <b>4E-02</b> | 676 | 3E-03  | <b>2E-02</b> | 3E-03  | <b>2E-02</b> |
| <i>ADH4</i>      | 664 | -0,20 | <b>1E-04</b> | -0,15 | <b>6E-03</b> | 676 | 2E-03  | 2E-01        | 2E-03  | 1E-01        |
| <i>NEU1</i>      | 664 | -0,21 | <b>2E-04</b> | -0,19 | <b>6E-04</b> | 676 | -6E-04 | 7E-01        | -5E-04 | 7E-01        |
| <i>CRTAC1</i>    | 665 | 0,16  | <b>3E-03</b> | 0,12  | <b>3E-02</b> | 677 | 4E-03  | <b>1E-02</b> | 4E-03  | <b>1E-02</b> |
| <i>SORD</i>      | 664 | -0,12 | <b>2E-02</b> | -0,09 | 7E-02        | 676 | -1E-04 | 9E-01        | 1E-04  | 9E-01        |
| <i>FTCD</i>      | 663 | -0,15 | <b>7E-03</b> | -0,13 | <b>1E-02</b> | 674 | 8E-04  | 6E-01        | 9E-04  | 6E-01        |
| <i>RGMB</i>      | 665 | 0,21  | <b>4E-04</b> | 0,14  | <b>3E-02</b> | 677 | 2E-03  | 1E-01        | 3E-03  | 1E-01        |
| <i>NEGR1</i>     | 664 | 0,23  | <b>4E-05</b> | 0,18  | <b>2E-03</b> | 676 | 3E-03  | <b>4E-02</b> | 3E-03  | <b>4E-02</b> |
| <i>CCDC126</i>   | 665 | 0,26  | <b>3E-06</b> | 0,18  | <b>2E-03</b> | 677 | 4E-03  | <b>1E-02</b> | 4E-03  | <b>3E-02</b> |
| <i>AGRN</i>      | 665 | -0,23 | <b>3E-05</b> | -0,19 | <b>5E-04</b> | 677 | 4E-04  | 8E-01        | 6E-04  | 7E-01        |
| <i>LEAP2</i>     | 665 | 0,04  | 5E-01        | 0,04  | 4E-01        | 677 | 2E-03  | 2E-01        | 2E-03  | 2E-01        |
| <i>MYOC</i>      | 665 | 0,11  | 6E-02        | 0,09  | 9E-02        | 677 | 1E-03  | 4E-01        | 1E-03  | 4E-01        |
| <i>IL18R1</i>    | 665 | -0,13 | <b>1E-02</b> | -0,12 | <b>2E-02</b> | 677 | -1E-04 | 9E-01        | 1E-05  | 1E+00        |
| <i>PTPRS</i>     | 665 | 0,19  | <b>5E-04</b> | 0,14  | <b>8E-03</b> | 677 | -6E-04 | 7E-01        | -7E-04 | 7E-01        |
| <i>HMGCS1</i>    | 664 | -0,06 | 3E-01        | -0,09 | 9E-02        | 676 | 3E-03  | 8E-02        | 3E-03  | 9E-02        |
| <i>PSAT1</i>     | 665 | -0,20 | <b>1E-04</b> | -0,16 | <b>2E-03</b> | 677 | 3E-03  | 7E-02        | 3E-03  | 5E-02        |
| <i>THBS2</i>     | 664 | -0,10 | 8E-02        | -0,14 | <b>1E-02</b> | 676 | -1E-03 | 4E-01        | -1E-03 | 4E-01        |
| <i>LRRC15</i>    | 663 | 0,16  | <b>6E-03</b> | 0,13  | <b>3E-02</b> | 675 | -1E-03 | 4E-01        | -1E-03 | 5E-01        |
| <i>DCUN1D1</i>   | 664 | -0,10 | 7E-02        | -0,03 | 6E-01        | 676 | -3E-04 | 8E-01        | 2E-04  | 9E-01        |
| <i>GPD1</i>      | 665 | -0,22 | <b>3E-05</b> | -0,14 | <b>1E-02</b> | 677 | 1E-03  | 4E-01        | 2E-03  | 2E-01        |
| <i>CADM2</i>     | 663 | 0,21  | <b>2E-04</b> | 0,11  | 7E-02        | 675 | 1E-03  | 4E-01        | 1E-03  | 4E-01        |
| <i>EPHB6</i>     | 664 | 0,23  | <b>3E-04</b> | 0,15  | <b>2E-02</b> | 676 | -9E-04 | 6E-01        | -1E-03 | 5E-01        |
| <i>AKR1D1</i>    | 665 | -0,19 | <b>1E-04</b> | -0,16 | <b>1E-03</b> | 677 | 1E-03  | 5E-01        | 1E-03  | 4E-01        |
| <i>TNFSF12</i>   | 663 | 0,12  | <b>2E-02</b> | 0,07  | 2E-01        | 675 | -2E-03 | 1E-01        | -2E-03 | 1E-01        |
| <i>LMAN2</i>     | 663 | -0,09 | 9E-02        | -0,05 | 4E-01        | 675 | -9E-04 | 5E-01        | -7E-04 | 6E-01        |
| <i>GPR56</i>     | 664 | -0,08 | 1E-01        | -0,08 | 1E-01        | 676 | 1E-03  | 3E-01        | 1E-03  | 4E-01        |
| <i>COL11A2</i>   | 664 | 0,10  | 1E-01        | 0,01  | 8E-01        | 676 | -1E-03 | 4E-01        | -2E-03 | 4E-01        |
| <i>HTRA1</i>     | 664 | -0,24 | <b>6E-06</b> | -0,17 | <b>1E-03</b> | 676 | -3E-03 | 5E-02        | -3E-03 | 1E-01        |
| <i>AGER</i>      | 665 | 0,18  | <b>4E-03</b> | 0,09  | 2E-01        | 677 | 2E-03  | 3E-01        | 2E-03  | 4E-01        |
| <i>SLITRK6</i>   | 664 | 0,18  | <b>8E-04</b> | 0,13  | <b>1E-02</b> | 676 | 3E-03  | 8E-02        | 3E-03  | 9E-02        |
| <i>AKR1C4</i>    | 663 | -0,15 | <b>6E-03</b> | -0,12 | <b>3E-02</b> | 675 | 4E-04  | 8E-01        | 5E-04  | 7E-01        |
| <i>SERPINB13</i> | 663 | 0,20  | <b>3E-04</b> | 0,13  | <b>2E-02</b> | 675 | 4E-03  | <b>2E-02</b> | 3E-03  | <b>3E-02</b> |
| <i>LGALS3BP</i>  | 665 | -0,26 | <b>4E-06</b> | -0,20 | <b>5E-04</b> | 677 | -1E-03 | 4E-01        | -1E-03 | 5E-01        |
| <i>NPTXR</i>     | 665 | 0,15  | <b>7E-03</b> | 0,05  | 4E-01        | 677 | 2E-03  | 3E-01        | 1E-03  | 4E-01        |
| <i>ILIRN</i>     | 664 | -0,22 | <b>7E-05</b> | -0,12 | <b>4E-02</b> | 676 | -3E-03 | <b>5E-02</b> | -3E-03 | 9E-02        |
| <i>TNFAIP6</i>   | 664 | 0,09  | 1E-01        | -0,01 | 9E-01        | 676 | -5E-04 | 7E-01        | -1E-03 | 4E-01        |
| <i>MPO</i>       | 665 | 0,02  | 7E-01        | 0,03  | 5E-01        | 677 | -3E-03 | <b>3E-02</b> | -3E-03 | <b>4E-02</b> |
| <i>SLC35G2</i>   | 665 | -0,12 | <b>3E-02</b> | -0,07 | 2E-01        | 677 | 2E-04  | 9E-01        | 4E-04  | 8E-01        |
| <i>EHMT2</i>     | 664 | 0,20  | <b>1E-04</b> | 0,12  | <b>4E-02</b> | 676 | 4E-03  | <b>4E-03</b> | 4E-03  | <b>1E-02</b> |

|                  |     |       |              |       |              |     |        |              |        |              |
|------------------|-----|-------|--------------|-------|--------------|-----|--------|--------------|--------|--------------|
| <i>FAM20B</i>    | 665 | 0,15  | <b>4E-03</b> | 0,09  | 1E-01        | 677 | 3E-05  | 1E+00        | -4E-04 | 8E-01        |
| <i>ANTXR2</i>    | 665 | 0,22  | <b>5E-05</b> | 0,15  | <b>6E-03</b> | 677 | 5E-03  | <b>1E-03</b> | 5E-03  | <b>3E-03</b> |
| <i>AMY2A</i>     | 664 | 0,20  | <b>3E-04</b> | 0,13  | <b>3E-02</b> | 676 | 2E-03  | 3E-01        | 1E-03  | 4E-01        |
| <i>STX1A</i>     | 663 | 0,20  | <b>2E-04</b> | 0,15  | <b>9E-03</b> | 675 | 1E-03  | 4E-01        | 1E-03  | 4E-01        |
| <i>CTHRC1</i>    | 665 | 0,15  | <b>6E-03</b> | 0,11  | <b>4E-02</b> | 677 | 1E-03  | 4E-01        | 1E-03  | 5E-01        |
| <i>PLAT</i>      | 665 | -0,10 | 9E-02        | -0,04 | 5E-01        | 677 | 3E-03  | <b>4E-02</b> | 4E-03  | <b>2E-02</b> |
| <i>VOPPI</i>     | 665 | 0,22  | <b>5E-05</b> | 0,12  | <b>4E-02</b> | 677 | 1E-03  | 5E-01        | 5E-04  | 8E-01        |
| <i>PCOLCE</i>    | 664 | 0,15  | <b>5E-03</b> | 0,12  | <b>2E-02</b> | 676 | 3E-03  | 6E-02        | 3E-03  | 8E-02        |
| <i>ANTXR1</i>    | 665 | 0,21  | <b>2E-04</b> | 0,13  | <b>2E-02</b> | 677 | 4E-03  | <b>1E-02</b> | 4E-03  | <b>3E-02</b> |
| <i>KITLG</i>     | 663 | 0,22  | <b>3E-05</b> | 0,18  | <b>5E-04</b> | 675 | 2E-04  | 9E-01        | 2E-04  | 9E-01        |
| <i>ARL15</i>     | 664 | -0,17 | <b>2E-03</b> | -0,10 | 7E-02        | 676 | -2E-03 | 2E-01        | -2E-03 | 2E-01        |
| <i>APLP1</i>     | 665 | 0,22  | <b>9E-05</b> | 0,12  | 5E-02        | 677 | 3E-03  | 6E-02        | 3E-03  | 8E-02        |
| <i>APOM</i>      | 664 | 0,14  | <b>7E-03</b> | 0,12  | <b>2E-02</b> | 676 | 9E-04  | 5E-01        | 6E-04  | 7E-01        |
| <i>EFNB2</i>     | 665 | 0,08  | 2E-01        | 0,02  | 7E-01        | 677 | -3E-04 | 8E-01        | -5E-04 | 8E-01        |
| <i>SERPINA11</i> | 665 | 0,10  | 8E-02        | 0,04  | 4E-01        | 677 | 2E-04  | 9E-01        | 5E-05  | 1E+00        |
| <i>DSG2</i>      | 665 | 0,25  | <b>4E-06</b> | 0,19  | <b>1E-03</b> | 677 | 2E-03  | 3E-01        | 1E-03  | 4E-01        |
| <i>ADAMTSL1</i>  | 665 | 0,14  | <b>1E-02</b> | 0,04  | 4E-01        | 677 | 1E-03  | 5E-01        | 7E-04  | 7E-01        |
| <i>DNAJB9</i>    | 665 | -0,26 | <b>5E-07</b> | -0,20 | <b>2E-04</b> | 677 | -4E-03 | <b>3E-03</b> | -4E-03 | <b>7E-03</b> |
| <i>IGFBP1</i>    | 663 | 0,19  | <b>1E-03</b> | 0,01  | 9E-01        | 675 | -3E-04 | 8E-01        | -2E-03 | 3E-01        |
| <i>ART3</i>      | 665 | 0,20  | <b>7E-04</b> | 0,10  | 1E-01        | 677 | 2E-03  | 2E-01        | 2E-03  | 2E-01        |
| <i>LEP</i>       | 665 | -0,23 | <b>2E-03</b> | 0,01  | 9E-01        | 677 | 1E-03  | 6E-01        | 4E-03  | 1E-01        |
| <i>SEZ6L</i>     | 665 | 0,25  | <b>5E-05</b> | 0,14  | 6E-02        | 677 | 1E-03  | 4E-01        | 1E-03  | 5E-01        |
| <i>WFIKKN2</i>   | 665 | 0,21  | <b>1E-04</b> | 0,12  | 6E-02        | 676 | 3E-03  | <b>4E-02</b> | 3E-03  | <b>4E-02</b> |
| <i>PTPRD</i>     | 665 | 0,16  | <b>6E-03</b> | 0,05  | 5E-01        | 677 | 9E-04  | 6E-01        | 6E-04  | 8E-01        |
| <i>PCDH10</i>    | 664 | 0,21  | <b>1E-04</b> | 0,12  | 5E-02        | 676 | 2E-03  | 2E-01        | 2E-03  | 3E-01        |
| <i>AZGP1</i>     | 664 | 0,24  | <b>6E-05</b> | 0,17  | <b>5E-03</b> | 676 | -1E-03 | 5E-01        | -2E-03 | 2E-01        |
| <i>AMY2B</i>     | 665 | 0,19  | <b>7E-04</b> | 0,12  | <b>4E-02</b> | 677 | 2E-03  | 1E-01        | 2E-03  | 2E-01        |
| <i>SIGLEC12</i>  | 664 | -0,16 | <b>3E-03</b> | -0,12 | <b>2E-02</b> | 676 | -1E-03 | 4E-01        | -1E-03 | 4E-01        |
| <i>SLITRK1</i>   | 664 | 0,24  | <b>1E-05</b> | 0,15  | <b>1E-02</b> | 676 | 2E-03  | 3E-01        | 2E-03  | 3E-01        |
| <i>PRSSI</i>     | 664 | 0,12  | <b>4E-02</b> | 0,05  | 4E-01        | 676 | 2E-03  | 1E-01        | 2E-03  | 2E-01        |
| <i>NCAN</i>      | 665 | 0,12  | <b>3E-02</b> | 0,00  | 1E+00        | 677 | 5E-04  | 8E-01        | 3E-04  | 9E-01        |
| <i>OMG</i>       | 665 | 0,12  | <b>3E-02</b> | 0,04  | 4E-01        | 677 | 4E-03  | <b>3E-03</b> | 5E-03  | <b>3E-03</b> |
| <i>IGFBP4</i>    | 664 | -0,16 | <b>2E-03</b> | -0,11 | <b>4E-02</b> | 676 | 7E-04  | 6E-01        | 9E-04  | 5E-01        |
| <i>SLITRK5</i>   | 665 | 0,08  | 2E-01        | 0,02  | 8E-01        | 677 | 5E-04  | 8E-01        | 8E-04  | 7E-01        |
| <i>ST3GAL1</i>   | 664 | 0,15  | <b>7E-03</b> | 0,06  | 3E-01        | 676 | 2E-03  | 1E-01        | 2E-03  | 2E-01        |
| <i>TLL1</i>      | 664 | -0,01 | 8E-01        | -0,04 | 4E-01        | 676 | 2E-04  | 9E-01        | -5E-05 | 1E+00        |
| <i>MET</i>       | 665 | 0,06  | 3E-01        | 0,02  | 7E-01        | 677 | -1E-03 | 5E-01        | -1E-03 | 4E-01        |
| <i>HS6ST3</i>    | 665 | 0,20  | <b>7E-04</b> | 0,07  | 3E-01        | 677 | 3E-03  | <b>5E-02</b> | 4E-03  | 5E-02        |
| <i>F9</i>        | 665 | -0,20 | <b>7E-05</b> | -0,14 | <b>1E-02</b> | 677 | -5E-03 | <b>3E-04</b> | -6E-03 | <b>3E-04</b> |
| <i>TMEM9</i>     | 663 | -0,01 | 8E-01        | -0,04 | 5E-01        | 675 | -1E-03 | 5E-01        | -1E-03 | 4E-01        |
| <i>FABP3</i>     | 665 | -0,20 | <b>2E-03</b> | 0,00  | 1E+00        | 677 | -1E-03 | 4E-01        | -4E-04 | 9E-01        |



**SUPPLEMENTAL TABLE 6: Two-sample Mendelian randomization results for the causal effect of proteins on type 2 diabetes (Columns C, E-N)**

| Gene Symbol      | CHS Incident diabetes |       |                    | DIAMANTE Diabetes GWAS |                   |             |              |          |      |       |
|------------------|-----------------------|-------|--------------------|------------------------|-------------------|-------------|--------------|----------|------|-------|
|                  | HR                    | p     | Concordant with MR | SNPs                   | IVW or Wald Ratio |             |              | MR Egger |      |       |
|                  |                       |       |                    |                        | Beta              | SE          | p            | Beta     | SE   | p     |
| <i>NCAN</i>      | 0,78                  | 3E-06 | Yes                | 1                      | <b>-0,20</b>      | <b>0,04</b> | <b>5E-08</b> |          |      |       |
| <i>PLXNB2</i>    | 1,36                  | 6E-07 | No                 | 3                      | <b>-0,04</b>      | <b>0,01</b> | <b>8E-05</b> | -0,05    | 0,02 | 2E-01 |
| <i>NEGR1</i>     | 0,70                  | 7E-09 | Yes                | 1                      | <b>-0,15</b>      | <b>0,04</b> | <b>1E-04</b> |          |      |       |
| <i>SHBG</i>      | 0,67                  | 3E-12 | Yes                | 1                      | <b>-0,14</b>      | <b>0,04</b> | <b>2E-04</b> |          |      |       |
| <i>OMG</i>       | 0,79                  | 6E-06 | Yes                | 1                      | <b>-0,28</b>      | <b>0,08</b> | <b>4E-04</b> |          |      |       |
| <i>NEGR1</i>     | 0,72                  | 6E-09 | Yes                | 2                      | <b>-0,10</b>      | <b>0,03</b> | <b>8E-04</b> |          |      |       |
| <i>TGFBR3</i>    | 0,71                  | 8E-10 | No                 | 1                      | <b>0,26</b>       | <b>0,08</b> | <b>2E-03</b> |          |      |       |
| <i>AMY2B</i>     | 0,76                  | 6E-07 | No                 | 7                      | <b>0,04</b>       | <b>0,01</b> | <b>4E-03</b> | 0,04     | 0,03 | 2E-01 |
| <i>IGFBP4</i>    | 1,28                  | 6E-06 | No                 | 1                      | <b>-0,28</b>      | <b>0,11</b> | <b>1E-02</b> |          |      |       |
| <i>TNFAIP6</i>   | 0,76                  | 3E-06 | Yes                | 4                      | <b>-0,02</b>      | <b>0,01</b> | <b>2E-02</b> | -0,05    | 0,03 | 2E-01 |
| <i>ADH1C</i>     | 1,32                  | 5E-09 | No                 | 1                      | <b>-0,03</b>      | <b>0,01</b> | <b>2E-02</b> |          |      |       |
| <i>ALDOB</i>     | 1,28                  | 1E-07 | Yes                | 1                      | <b>0,07</b>       | <b>0,03</b> | <b>3E-02</b> |          |      |       |
| <i>TNFSF12</i>   | 0,71                  | 1E-06 | Yes                | 2                      | <b>-0,02</b>      | <b>0,01</b> | <b>3E-02</b> |          |      |       |
| <i>IGFBP1</i>    | 0,75                  | 7E-09 | No                 | 1                      | <b>0,16</b>       | <b>0,08</b> | <b>4E-02</b> |          |      |       |
| <i>INHBC</i>     | 1,50                  | 4E-13 | Yes                | 1                      | 0,12              | 0,07        | 1E-01        |          |      |       |
| <i>LEAP2</i>     | 1,35                  | 2E-08 | No                 | 1                      | -0,04             | 0,02        | 6E-02        |          |      |       |
| <i>PRCP</i>      | 1,54                  | 5E-14 | Yes                | 1                      | 0,01              | 0,04        | 8E-01        |          |      |       |
| <i>ADSSL1</i>    | 1,27                  | 4E-08 | Yes                | 2                      | 0,02              | 0,01        | 1E-01        |          |      |       |
| <i>AGRN</i>      | 1,35                  | 8E-10 | Yes                | 1                      | 0,00              | 0,03        | 9E-01        |          |      |       |
| <i>ASL</i>       | 1,25                  | 1E-06 | No                 | 1                      | -0,10             | 0,06        | 8E-02        |          |      |       |
| <i>GUSB</i>      | 1,54                  | 1E-15 | Yes                | 1                      | 0,07              | 0,04        | 1E-01        |          |      |       |
| <i>WFIKK2</i>    | 0,75                  | 1E-07 | Yes                | 2                      | -0,02             | 0,01        | 5E-02        |          |      |       |
| <i>PCOLCE</i>    | 0,79                  | 6E-06 | No                 | 2                      | 0,01              | 0,04        | 7E-01        |          |      |       |
| <i>IL1RN</i>     | 1,20                  | 2E-07 | Yes                | 2                      | 0,02              | 0,02        | 3E-01        |          |      |       |
| <i>APOF</i>      | 0,64                  | 2E-16 | No                 | 2                      | 0,05              | 0,04        | 2E-01        |          |      |       |
| <i>ACY1</i>      | 1,39                  | 6E-13 | Yes                | 1                      | 0,05              | 0,05        | 3E-01        |          |      |       |
| <i>CCDC126</i>   | 0,70                  | 2E-10 | No                 | 2                      | 0,10              | 0,06        | 8E-02        |          |      |       |
| <i>ART3</i>      | 0,72                  | 5E-08 | No                 | 2                      | 0,05              | 0,05        | 3E-01        |          |      |       |
| <i>ADAMTSL2</i>  | 1,37                  | 3E-11 | Yes                | 3                      | 0,04              | 0,04        | 3E-01        | -0,06    | 0,16 | 8E-01 |
| <i>CADM2</i>     | 0,68                  | 6E-10 | Yes                | 1                      | -0,01             | 0,05        | 8E-01        |          |      |       |
| <i>RTN4R</i>     | 1,39                  | 1E-09 | No                 | 5                      | -0,01             | 0,02        | 5E-01        | -0,03    | 0,09 | 8E-01 |
| <i>ADH4</i>      | 1,30                  | 6E-09 | Yes                | 1                      | 0,01              | 0,02        | 5E-01        |          |      |       |
| <i>TLL1</i>      | 1,28                  | 7E-06 | No                 | 1                      | -0,01             | 0,11        | 1E+00        |          |      |       |
| <i>AKR1C4</i>    | 1,25                  | 1E-06 | Yes                | 1                      | 0,00              | 0,01        | 9E-01        |          |      |       |
| <i>SERPINA11</i> | 0,77                  | 8E-06 | No                 | 4                      | 0,02              | 0,02        | 4E-01        | 0,04     | 0,08 | 7E-01 |

|                  |      |       |            |   |       |      |       |              |             |              |
|------------------|------|-------|------------|---|-------|------|-------|--------------|-------------|--------------|
| <i>NPTXR</i>     | 0,72 | 1E-08 | No         | 3 | 0,00  | 0,01 | 1E+00 | 0,00         | 0,02        | 9E-01        |
| <i>HRSP12</i>    | 1,36 | 2E-10 | <b>Yes</b> | 1 | 0,02  | 0,02 | 4E-01 |              |             |              |
| <i>MYOC</i>      | 0,75 | 2E-07 | <b>Yes</b> | 4 | -0,02 | 0,02 | 4E-01 | 0,04         | 0,04        | 5E-01        |
| <i>APOM</i>      | 0,76 | 3E-07 | <b>Yes</b> | 3 | -0,01 | 0,15 | 1E+00 | -0,03        | 0,29        | 9E-01        |
| <i>HTRA1</i>     | 1,33 | 8E-10 | No         | 2 | -0,11 | 0,07 | 1E-01 |              |             |              |
| <i>DSG2</i>      | 0,79 | 8E-06 | <b>Yes</b> | 3 | -0,05 | 0,04 | 2E-01 | 0,05         | 0,07        | 6E-01        |
| <i>IGFBP2</i>    | 0,63 | 1E-14 | <b>Yes</b> | 2 | -0,09 | 0,06 | 9E-02 |              |             |              |
| <i>SLITRK5</i>   | 0,76 | 7E-06 | <b>Yes</b> | 3 | -0,02 | 0,04 | 6E-01 | 0,13         | 0,25        | 7E-01        |
| <i>SLITRK3</i>   | 0,69 | 4E-12 | No         | 4 | 0,00  | 0,02 | 1E+00 | 0,01         | 0,03        | 7E-01        |
| <i>CPM</i>       | 1,36 | 5E-11 | <b>Yes</b> | 3 | 0,06  | 0,05 | 2E-01 | -0,15        | 0,19        | 6E-01        |
| <i>CHAD</i>      | 0,75 | 7E-08 | <b>Yes</b> | 1 | -0,17 | 0,12 | 1E-01 |              |             |              |
| <i>SCG3</i>      | 0,68 | 2E-12 | <b>Yes</b> | 2 | -0,01 | 0,01 | 3E-01 |              |             |              |
| <i>MET</i>       | 0,80 | 8E-06 | No         | 2 | 0,00  | 0,04 | 1E+00 |              |             |              |
| <i>SEZ6L</i>     | 0,74 | 8E-08 | <b>Yes</b> | 3 | -0,09 | 0,07 | 2E-01 | 0,15         | 0,61        | 8E-01        |
| <i>EFNB2</i>     | 0,74 | 7E-06 | No         | 2 | 0,03  | 0,07 | 7E-01 |              |             |              |
| <i>THBS2</i>     | 1,31 | 5E-08 | <b>Yes</b> | 8 | 0,01  | 0,02 | 7E-01 | 0,00         | 0,02        | 1E+00        |
| <i>SLITRK6</i>   | 0,71 | 5E-07 | <b>Yes</b> | 1 | -0,05 | 0,04 | 2E-01 |              |             |              |
| <i>FBP1</i>      | 1,31 | 1E-09 | <b>Yes</b> | 2 | 0,01  | 0,03 | 8E-01 |              |             |              |
| <i>PTPRU</i>     | 1,35 | 2E-15 | <b>Yes</b> | 2 | 0,01  | 0,03 | 7E-01 |              |             |              |
| <i>CRTAC1</i>    | 0,77 | 4E-07 | <b>Yes</b> | 6 | 0,00  | 0,02 | 1E+00 | <b>-0,11</b> | <b>0,04</b> | <b>4E-02</b> |
| <i>VOPPI</i>     | 0,72 | 3E-07 | No         | 2 | 0,05  | 0,04 | 2E-01 |              |             |              |
| <i>LGALS3BP</i>  | 1,29 | 4E-07 | No         | 3 | -0,05 | 0,03 | 1E-01 | -0,01        | 0,08        | 9E-01        |
| <i>PLAT</i>      | 1,34 | 1E-07 | <b>Yes</b> | 1 | 0,02  | 0,04 | 5E-01 |              |             |              |
| <i>COL11A2</i>   | 0,79 | 7E-06 | <b>Yes</b> | 2 | -0,01 | 0,04 | 7E-01 |              |             |              |
| <i>PTPRS</i>     | 0,75 | 9E-08 | <b>Yes</b> | 1 | -0,04 | 0,08 | 6E-01 |              |             |              |
| <i>SLITRK1</i>   | 0,74 | 3E-06 | No         | 1 | 0,18  | 0,11 | 1E-01 |              |             |              |
| <i>TMEM9</i>     | 0,99 | 8E-01 | <b>Yes</b> | 1 | -0,07 | 0,10 | 5E-01 |              |             |              |
| <i>MXRA8</i>     | 0,60 | 6E-18 | No         | 1 | 0,11  | 0,08 | 2E-01 |              |             |              |
| <i>SORD</i>      | 1,31 | 1E-07 | No         | 3 | -0,01 | 0,04 | 9E-01 | 0,39         | 0,20        | 3E-01        |
| <i>FTCD</i>      | 1,31 | 5E-08 | No         | 1 | -0,02 | 0,02 | 3E-01 |              |             |              |
| <i>EPHB6</i>     | 0,69 | 1E-07 | <b>Yes</b> | 1 | -0,02 | 0,01 | 7E-02 |              |             |              |
| <i>ANTXR2</i>    | 0,75 | 1E-07 | <b>Yes</b> | 2 | 0,00  | 0,05 | 9E-01 |              |             |              |
| <i>ADIPOQ</i>    | 0,65 | 9E-14 | No         | 5 | 0,02  | 0,02 | 3E-01 | 0,07         | 0,03        | 1E-01        |
| <i>TIMP4</i>     | 0,76 | 4E-06 | No         | 3 | 0,06  | 0,09 | 5E-01 | -0,18        | 0,20        | 5E-01        |
| <i>GPR56</i>     | 1,24 | 3E-07 | <b>Yes</b> | 1 | 0,05  | 0,10 | 6E-01 |              |             |              |
| <i>SERPINB13</i> | 0,73 | 7E-06 | <b>Yes</b> | 1 | -0,03 | 0,04 | 4E-01 |              |             |              |
| <i>ST3GAL1</i>   | 0,74 | 7E-06 | <b>Yes</b> | 3 | -0,03 | 0,02 | 3E-01 | 0,04         | 0,06        | 6E-01        |
| <i>GHR</i>       | 1,47 | 6E-11 | <b>Yes</b> | 2 | 0,01  | 0,06 | 9E-01 |              |             |              |
| <i>IL18R1</i>    | 1,22 | 2E-07 | <b>Yes</b> | 2 | 0,03  | 0,02 | 3E-01 |              |             |              |
| <i>APLP1</i>     | 0,76 | 6E-08 | No         | 1 | 0,04  | 0,06 | 5E-01 |              |             |              |

|                 |      |       |            |   |       |      |       |       |      |       |  |
|-----------------|------|-------|------------|---|-------|------|-------|-------|------|-------|--|
| <i>GPD1</i>     | 1,36 | 1E-09 | <b>Yes</b> | 1 | 0,01  | 0,06 | 8E-01 |       |      |       |  |
| <i>MPO</i>      | 1,27 | 2E-06 | <b>Yes</b> | 3 | 0,03  | 0,02 | 2E-01 | -0,02 | 0,04 | 7E-01 |  |
| <i>RGMB</i>     | 0,67 | 4E-10 | <b>Yes</b> | 2 | -0,01 | 0,02 | 6E-01 |       |      |       |  |
| <i>PCDH10</i>   | 0,71 | 4E-07 | <b>Yes</b> | 2 | -0,02 | 0,05 | 7E-01 |       |      |       |  |
| <i>UNC5D</i>    | 0,66 | 2E-12 | No         | 2 | 0,04  | 0,02 | 1E-01 |       |      |       |  |
| <i>FAM20B</i>   | 0,73 | 2E-07 | <b>Yes</b> | 2 | -0,07 | 0,04 | 1E-01 |       |      |       |  |
| <i>ASGR1</i>    | 1,34 | 5E-10 | No         | 2 | -0,03 | 0,03 | 3E-01 |       |      |       |  |
| <i>AMY2A</i>    | 0,74 | 8E-09 | No         | 3 | 0,03  | 0,02 | 2E-01 | 0,06  | 0,03 | 3E-01 |  |
| <i>LRRC15</i>   | 0,76 | 7E-07 | <b>Yes</b> | 3 | -0,03 | 0,02 | 1E-01 | -0,01 | 0,04 | 8E-01 |  |
| <i>ADAMTSL1</i> | 0,76 | 1E-06 | No         | 8 | 0,01  | 0,03 | 8E-01 | 0,03  | 0,04 | 5E-01 |  |
| <i>CES1</i>     | 1,33 | 3E-09 | No         | 1 | -0,02 | 0,03 | 6E-01 |       |      |       |  |
| <i>NFASC</i>    | 1,23 | 3E-07 | <b>Yes</b> | 4 | 0,01  | 0,04 | 8E-01 | 0,06  | 0,06 | 4E-01 |  |

SUPPLEMENTAL TABLE 6: Two-sample Mendelian randomization results for the causal effect of proteins on type 2 diabetes (Columns C, O-AB)

| MAGIC Fasting Glucose GWAS |      |                   |             |              |          |    |   | MAGIC HbA1c GWAS |                   |              |              |          |    |   |        |       |       |        |       |       |
|----------------------------|------|-------------------|-------------|--------------|----------|----|---|------------------|-------------------|--------------|--------------|----------|----|---|--------|-------|-------|--------|-------|-------|
| Gene Symbol                | SNPs | IVW or Wald Ratio |             |              | MR Egger |    |   | SNPs             | IVW or Wald Ratio |              |              | MR Egger |    |   |        |       |       |        |       |       |
|                            |      | Beta              | SE          | p            | Beta     | SE | p |                  | Beta              | SE           | p            | Beta     | SE | p |        |       |       |        |       |       |
| NCAN                       | 1    | -0,013            | 0,01        | 2E-01        |          |    |   | 1                | 0,000             | 0,007        | 1E+00        |          |    |   |        |       |       |        |       |       |
| PLXNB2                     | 3    | -0,001            | 0,00        | 8E-01        |          |    |   | -0,005           | 0,007             | 6E-01        | 3            |          |    |   | -0,001 | 0,002 | 6E-01 | -0,003 | 0,004 | 7E-01 |
| NEGR1                      | 1    | 0,016             | 0,01        | 1E-01        |          |    |   | 1                | 0,003             | 0,008        | 7E-01        |          |    |   |        |       |       |        |       |       |
| SHBG                       | 1    | -0,019            | 0,01        | 9E-02        |          |    |   | 1                | <b>-0,045</b>     | <b>0,008</b> | <b>6E-08</b> |          |    |   |        |       |       |        |       |       |
| OMG                        | 1    | -0,018            | 0,02        | 4E-01        |          |    |   | 1                | 0,002             | 0,017        | 9E-01        |          |    |   |        |       |       |        |       |       |
| NEGR1                      | 2    | -0,001            | 0,02        | 9E-01        |          |    |   | 2                | -0,003            | 0,007        | 7E-01        |          |    |   |        |       |       |        |       |       |
| TGFBR3                     | 1    | <b>0,057</b>      | <b>0,03</b> | <b>3E-02</b> |          |    |   | 1                | <b>0,038</b>      | <b>0,018</b> | <b>4E-02</b> |          |    |   |        |       |       |        |       |       |
| AMY2B                      | 7    | 0,002             | 0,00        | 6E-01        |          |    |   | 0,010            | 0,011             | 4E-01        | 7            |          |    |   | 0,003  | 0,004 | 4E-01 | -0,002 | 0,010 | 9E-01 |
| IGFBP4                     | 1    | -0,005            | 0,03        | 9E-01        |          |    |   | 1                | 0,013             | 0,025        | 6E-01        |          |    |   |        |       |       |        |       |       |
| TNFAIP6                    | 4    | -0,002            | 0,00        | 5E-01        |          |    |   | 0,004            | 0,007             | 7E-01        | 4            |          |    |   | -0,005 | 0,004 | 2E-01 | -0,017 | 0,006 | 1E-01 |
| ADH1C                      | 1    | -0,004            | 0,00        | 2E-01        |          |    |   | 1                | 0,001             | 0,002        | 8E-01        |          |    |   |        |       |       |        |       |       |
| ALDOB                      | 1    | -0,017            | 0,01        | 9E-02        |          |    |   | 1                | -0,001            | 0,009        | 9E-01        |          |    |   |        |       |       |        |       |       |
| TNFSF12                    | 2    | -0,001            | 0,00        | 8E-01        |          |    |   | 2                | <b>-0,006</b>     | <b>0,002</b> | <b>5E-03</b> |          |    |   |        |       |       |        |       |       |
| IGFBP1                     | 1    | 0,010             | 0,02        | 7E-01        |          |    |   | 1                | 0,009             | 0,018        | 6E-01        |          |    |   |        |       |       |        |       |       |
| INHBC                      | 1    | <b>0,050</b>      | <b>0,02</b> | <b>8E-03</b> |          |    |   | 1                | 0,020             | 0,015        | 2E-01        |          |    |   |        |       |       |        |       |       |
| LEAP2                      | 1    | <b>-0,016</b>     | <b>0,01</b> | <b>9E-03</b> |          |    |   | 1                | -0,007            | 0,005        | 1E-01        |          |    |   |        |       |       |        |       |       |
| PRCP                       | 2    | <b>0,021</b>      | <b>0,01</b> | <b>4E-02</b> |          |    |   | 2                | 0,001             | 0,008        | 9E-01        |          |    |   |        |       |       |        |       |       |
| ADSSL1                     | 2    | 0,003             | 0,00        | 5E-01        |          |    |   | 2                | <b>0,008</b>      | <b>0,003</b> | <b>4E-03</b> |          |    |   |        |       |       |        |       |       |
| AGRN                       | 2    | -0,007            | 0,01        | 5E-01        |          |    |   | 2                | <b>-0,018</b>     | <b>0,007</b> | <b>2E-02</b> |          |    |   |        |       |       |        |       |       |
| ASL                        | 1    | -0,012            | 0,02        | 5E-01        |          |    |   | 1                | <b>-0,028</b>     | <b>0,012</b> | <b>2E-02</b> |          |    |   |        |       |       |        |       |       |
| GUSB                       | 1    | 0,002             | 0,01        | 9E-01        |          |    |   | 1                | <b>0,019</b>      | <b>0,009</b> | <b>3E-02</b> |          |    |   |        |       |       |        |       |       |
| WFIKKN2                    | 2    | -0,004            | 0,01        | 5E-01        |          |    |   | 2                | <b>-0,006</b>     | <b>0,003</b> | <b>4E-02</b> |          |    |   |        |       |       |        |       |       |
| PCOLCE                     | 2    | 0,014             | 0,01        | 2E-01        |          |    |   | 2                | <b>-0,017</b>     | <b>0,008</b> | <b>4E-02</b> |          |    |   |        |       |       |        |       |       |

|           |   |        |      |       |        |       |       |   |        |       |       |        |       |       |
|-----------|---|--------|------|-------|--------|-------|-------|---|--------|-------|-------|--------|-------|-------|
| IL1RN     | 2 | 0,009  | 0,01 | 1E-01 |        |       |       | 2 | -0,002 | 0,003 | 6E-01 |        |       |       |
| APOF      | 2 | -0,009 | 0,01 | 4E-01 |        |       |       | 2 | 0,012  | 0,009 | 2E-01 |        |       |       |
| ACY1      | 1 | 0,022  | 0,03 | 4E-01 |        |       |       | 1 | 0,019  | 0,019 | 3E-01 |        |       |       |
| CCDC126   | 2 | 0,005  | 0,01 | 5E-01 |        |       |       | 2 | 0,010  | 0,005 | 8E-02 |        |       |       |
| ART3      | 3 | 0,002  | 0,01 | 8E-01 | -0,010 | 0,009 | 5E-01 | 3 | 0,001  | 0,004 | 8E-01 | -0,002 | 0,007 | 8E-01 |
| ADAMTSL2  | 4 | -0,028 | 0,02 | 7E-02 | -0,016 | 0,060 | 8E-01 | 4 | 0,004  | 0,012 | 7E-01 | 0,046  | 0,045 | 4E-01 |
| CADM2     | 1 | 0,013  | 0,01 | 3E-01 |        |       |       | 1 | 0,011  | 0,010 | 3E-01 |        |       |       |
| RTN4R     | 6 | -0,002 | 0,01 | 7E-01 | -0,003 | 0,035 | 9E-01 | 6 | -0,001 | 0,003 | 8E-01 | 0,025  | 0,017 | 2E-01 |
| ADH4      | 1 | -0,003 | 0,00 | 5E-01 |        |       |       | 1 | 0,002  | 0,003 | 6E-01 |        |       |       |
| TLL1      | 1 | 0,002  | 0,03 | 1E+00 |        |       |       | 1 | -0,032 | 0,025 | 2E-01 |        |       |       |
| AKR1C4    | 1 | 0,002  | 0,00 | 4E-01 |        |       |       | 1 | 0,002  | 0,002 | 3E-01 |        |       |       |
| SERPINA11 | 4 | -0,007 | 0,01 | 2E-01 | -0,025 | 0,022 | 4E-01 | 4 | -0,006 | 0,004 | 1E-01 | -0,016 | 0,016 | 4E-01 |
| NPTXR     | 3 | 0,000  | 0,01 | 9E-01 | 0,005  | 0,005 | 5E-01 | 3 | 0,001  | 0,003 | 7E-01 | 0,003  | 0,003 | 6E-01 |
| HRSP12    | 1 | -0,009 | 0,00 | 6E-02 |        |       |       | 1 | -0,006 | 0,003 | 1E-01 |        |       |       |
| MYOC      | 4 | -0,006 | 0,00 | 2E-01 | -0,012 | 0,013 | 5E-01 | 4 | -0,002 | 0,004 | 6E-01 | -0,001 | 0,010 | 9E-01 |
| APOM      | 3 | 0,004  | 0,01 | 7E-01 | -0,009 | 0,023 | 8E-01 | 3 | 0,004  | 0,008 | 6E-01 | -0,001 | 0,019 | 1E+00 |
| HTRA1     | 2 | 0,021  | 0,01 | 1E-01 |        |       |       | 2 | 0,007  | 0,008 | 4E-01 |        |       |       |
| DSG2      | 3 | 0,000  | 0,01 | 1E+00 | 0,019  | 0,020 | 5E-01 | 3 | 0,000  | 0,006 | 1E+00 | -0,011 | 0,015 | 6E-01 |
| IGFBP2    | 2 | -0,011 | 0,02 | 5E-01 |        |       |       | 2 | 0,005  | 0,019 | 8E-01 |        |       |       |
| SLITRK5   | 4 | -0,007 | 0,02 | 7E-01 | -0,082 | 0,112 | 5E-01 | 4 | -0,008 | 0,008 | 3E-01 | -0,062 | 0,041 | 3E-01 |
| SLITRK3   | 4 | -0,002 | 0,01 | 7E-01 | -0,005 | 0,008 | 6E-01 | 4 | 0,006  | 0,004 | 2E-01 | 0,008  | 0,006 | 3E-01 |
| CPM       | 3 | 0,004  | 0,01 | 8E-01 | -0,020 | 0,056 | 8E-01 | 3 | -0,006 | 0,010 | 6E-01 | 0,012  | 0,040 | 8E-01 |
| CHAD      | 1 | 0,042  | 0,03 | 2E-01 |        |       |       | 1 | -0,018 | 0,023 | 4E-01 |        |       |       |
| SCG3      | 2 | 0,001  | 0,00 | 6E-01 |        |       |       | 2 | 0,001  | 0,002 | 6E-01 |        |       |       |
| MET       | 2 | 0,003  | 0,02 | 9E-01 |        |       |       | 2 | 0,003  | 0,009 | 8E-01 |        |       |       |
| SEZ6L     | 4 | -0,038 | 0,02 | 7E-02 | -0,085 | 0,062 | 3E-01 | 4 | -0,015 | 0,015 | 3E-01 | 0,019  | 0,045 | 7E-01 |
| EFNB2     | 2 | -0,007 | 0,01 | 6E-01 |        |       |       | 2 | 0,008  | 0,014 | 6E-01 |        |       |       |

|           |   |        |      |       |        |       |       |   |        |       |       |        |       |       |
|-----------|---|--------|------|-------|--------|-------|-------|---|--------|-------|-------|--------|-------|-------|
| THBS2     | 8 | -0,002 | 0,00 | 6E-01 | -0,004 | 0,005 | 5E-01 | 8 | -0,001 | 0,004 | 8E-01 | 0,003  | 0,006 | 6E-01 |
| SLITRK6   | 1 | -0,001 | 0,01 | 1E+00 |        |       |       | 1 | 0,004  | 0,009 | 6E-01 |        |       |       |
| FBP1      | 2 | 0,001  | 0,01 | 9E-01 |        |       |       | 2 | 0,011  | 0,006 | 7E-02 |        |       |       |
| PTPRU     | 3 | -0,007 | 0,01 | 5E-01 | -0,029 | 0,049 | 7E-01 | 3 | -0,011 | 0,006 | 5E-02 | -0,024 | 0,021 | 5E-01 |
| CRTAC1    | 6 | -0,004 | 0,00 | 5E-01 | -0,002 | 0,013 | 9E-01 | 6 | -0,002 | 0,003 | 5E-01 | -0,007 | 0,008 | 4E-01 |
| VOPP1     | 2 | -0,016 | 0,01 | 2E-01 |        |       |       | 2 | 0,008  | 0,008 | 3E-01 |        |       |       |
| LGALS3BP  | 4 | 0,002  | 0,02 | 9E-01 | 0,011  | 0,046 | 8E-01 | 4 | -0,008 | 0,014 | 6E-01 | 0,005  | 0,035 | 9E-01 |
| PLAT      | 1 | 0,006  | 0,01 | 6E-01 |        |       |       | 1 | 0,009  | 0,008 | 3E-01 |        |       |       |
| COL11A2   | 2 | -0,002 | 0,00 | 6E-01 |        |       |       | 2 | 0,001  | 0,003 | 8E-01 |        |       |       |
| PTPRS     | 1 | -0,005 | 0,03 | 9E-01 |        |       |       | 1 | 0,011  | 0,028 | 7E-01 |        |       |       |
| SLITRK1   | 1 | -0,039 | 0,03 | 2E-01 |        |       |       | 1 | 0,001  | 0,023 | 1E+00 |        |       |       |
| TMEM9     | 1 | -0,031 | 0,03 | 2E-01 |        |       |       | 1 | 0,001  | 0,020 | 9E-01 |        |       |       |
| MXRA8     | 1 | -0,011 | 0,02 | 6E-01 |        |       |       | 1 | 0,024  | 0,020 | 2E-01 |        |       |       |
| SORD      | 3 | 0,009  | 0,01 | 4E-01 | -0,012 | 0,075 | 9E-01 | 3 | 0,016  | 0,009 | 7E-02 | 0,059  | 0,067 | 5E-01 |
| FTCD      | 1 | -0,003 | 0,01 | 7E-01 |        |       |       | 1 | 0,002  | 0,006 | 8E-01 |        |       |       |
| EPHB6     | 1 | -0,001 | 0,00 | 9E-01 |        |       |       | 1 | -0,002 | 0,003 | 4E-01 |        |       |       |
| ANTXR2    | 2 | -0,002 | 0,01 | 8E-01 |        |       |       | 2 | 0,000  | 0,006 | 1E+00 |        |       |       |
| ADIPOQ    | 5 | -0,002 | 0,01 | 7E-01 | -0,002 | 0,009 | 9E-01 | 5 | 0,002  | 0,005 | 7E-01 | -0,005 | 0,007 | 5E-01 |
| TIMP4     | 3 | 0,002  | 0,01 | 8E-01 | -0,017 | 0,011 | 4E-01 | 3 | -0,003 | 0,013 | 8E-01 | -0,005 | 0,043 | 9E-01 |
| GPR56     | 1 | 0,036  | 0,03 | 2E-01 |        |       |       | 1 | 0,000  | 0,021 | 1E+00 |        |       |       |
| SERPINB13 | 1 | -0,007 | 0,01 | 6E-01 |        |       |       | 1 | 0,002  | 0,010 | 8E-01 |        |       |       |
| ST3GAL1   | 3 | 0,005  | 0,01 | 7E-01 | -0,013 | 0,029 | 7E-01 | 3 | -0,003 | 0,007 | 7E-01 | -0,015 | 0,020 | 6E-01 |
| GHR       | 2 | 0,004  | 0,01 | 6E-01 |        |       |       | 2 | -0,010 | 0,009 | 3E-01 |        |       |       |
| IL18R1    | 2 | -0,005 | 0,01 | 5E-01 |        |       |       | 2 | -0,003 | 0,007 | 6E-01 |        |       |       |
| APLP1     | 1 | 0,012  | 0,02 | 5E-01 |        |       |       | 1 | -0,005 | 0,013 | 7E-01 |        |       |       |
| GPD1      | 1 | -0,016 | 0,02 | 4E-01 |        |       |       | 1 | -0,011 | 0,016 | 5E-01 |        |       |       |
| MPO       | 4 | 0,003  | 0,01 | 6E-01 | -0,017 | 0,015 | 4E-01 | 4 | 0,007  | 0,005 | 2E-01 | 0,014  | 0,012 | 4E-01 |

|          |   |        |      |       |        |       |       |   |        |       |       |        |       |       |
|----------|---|--------|------|-------|--------|-------|-------|---|--------|-------|-------|--------|-------|-------|
| RGMB     | 2 | 0,008  | 0,01 | 1E-01 |        |       |       | 2 | -0,003 | 0,004 | 4E-01 |        |       |       |
| PCDH10   | 2 | 0,002  | 0,01 | 9E-01 |        |       |       | 2 | -0,009 | 0,006 | 1E-01 |        |       |       |
| UNC5D    | 2 | 0,006  | 0,01 | 5E-01 |        |       |       | 2 | -0,001 | 0,005 | 8E-01 |        |       |       |
| FAM20B   | 2 | -0,021 | 0,01 | 9E-02 |        |       |       | 2 | 0,008  | 0,015 | 6E-01 |        |       |       |
| ASGR1    | 2 | -0,026 | 0,02 | 1E-01 |        |       |       | 2 | 0,014  | 0,008 | 1E-01 |        |       |       |
| AMY2A    | 4 | 0,002  | 0,00 | 6E-01 | 0,005  | 0,006 | 5E-01 | 4 | 0,002  | 0,003 | 6E-01 | 0,000  | 0,005 | 1E+00 |
| LRRC15   | 3 | -0,008 | 0,01 | 1E-01 | -0,008 | 0,013 | 6E-01 | 3 | 0,002  | 0,004 | 7E-01 | 0,002  | 0,010 | 9E-01 |
| ADAMTSL1 | 8 | -0,004 | 0,01 | 5E-01 | -0,001 | 0,008 | 9E-01 | 8 | -0,004 | 0,004 | 3E-01 | -0,002 | 0,006 | 8E-01 |
| CES1     | 1 | 0,006  | 0,01 | 7E-01 |        |       |       | 1 | -0,007 | 0,010 | 5E-01 |        |       |       |
| NFASC    | 4 | -0,004 | 0,00 | 4E-01 | -0,002 | 0,008 | 9E-01 | 4 | 0,000  | 0,003 | 9E-01 | -0,003 | 0,006 | 6E-01 |

SUPPLEMENTAL TABLE 6: Two-sample Mendelian randomization results for the causal effect of proteins on type 2 diabetes (Columns C, AC-AP)

| MAGIC 2-Hour Glucose GWAS |      |                   |              |              |          |       |       | MAGIC Fasting Insulin GWAS |                   |              |              |          |       |       |
|---------------------------|------|-------------------|--------------|--------------|----------|-------|-------|----------------------------|-------------------|--------------|--------------|----------|-------|-------|
| Gene Symbol               | SNPs | IVW or Wald Ratio |              |              | MR Egger |       |       | SNPs                       | IVW or Wald Ratio |              |              | MR Egger |       |       |
|                           |      | Beta              | SE           | p            | Beta     | SE    | p     |                            | Beta              | SE           | p            | Beta     | SE    | p     |
| <i>NCAN</i>               | 1    | 0,021             | 0,045        | 6E-01        |          |       |       | 1                          | -0,012            | 0,012        | 3E-01        |          |       |       |
| <i>PLXNB2</i>             | 3    | -0,013            | 0,019        | 5E-01        | -0,042   | 0,040 | 5E-01 | 3                          | 0,000             | 0,004        | 1E+00        | 0,004    | 0,008 | 7E-01 |
| <i>NEGR1</i>              | 1    | -0,072            | 0,048        | 1E-01        |          |       |       | 1                          | 0,001             | 0,012        | 1E+00        |          |       |       |
| <i>SHBG</i>               | 1    | <b>-0,111</b>     | <b>0,054</b> | <b>4E-02</b> |          |       |       | 1                          | <b>-0,031</b>     | <b>0,012</b> | <b>1E-02</b> |          |       |       |
| <i>OMG</i>                | 1    | -0,057            | 0,112        | 6E-01        |          |       |       | 1                          | -0,008            | 0,028        | 8E-01        |          |       |       |
| <i>NEGR1</i>              | 2    | -0,058            | 0,032        | 7E-02        |          |       |       | 2                          | -0,007            | 0,009        | 4E-01        |          |       |       |
| <i>TGFBR3</i>             | 1    | -0,006            | 0,118        | 1E+00        |          |       |       | 1                          | 0,019             | 0,028        | 5E-01        |          |       |       |
| <i>AMY2B</i>              | 7    | 0,010             | 0,018        | 6E-01        | 0,005    | 0,049 | 9E-01 | 7                          | -0,006            | 0,007        | 3E-01        | 0,015    | 0,016 | 4E-01 |
| <i>IGFBP4</i>             | 1    | 0,003             | 0,163        | 1E+00        |          |       |       | 1                          | 0,067             | 0,038        | 8E-02        |          |       |       |
| <i>TNFAIP6</i>            | 4    | -0,015            | 0,013        | 3E-01        | -0,031   | 0,036 | 5E-01 | 4                          | -0,003            | 0,004        | 4E-01        | -0,020   | 0,008 | 1E-01 |
| <i>ADH1C</i>              | 1    | -0,019            | 0,016        | 2E-01        |          |       |       | 1                          | -0,002            | 0,004        | 6E-01        |          |       |       |

|                  |   |               |              |              |        |       |       |   |               |              |              |        |       |       |
|------------------|---|---------------|--------------|--------------|--------|-------|-------|---|---------------|--------------|--------------|--------|-------|-------|
| <i>ALDOB</i>     | 1 | 0,032         | 0,044        | 5E-01        |        |       |       | 1 | 0,008         | 0,011        | 5E-01        |        |       |       |
| <i>TNFSF12</i>   | 2 | -0,021        | 0,027        | 4E-01        |        |       |       | 2 | -0,003        | 0,008        | 7E-01        |        |       |       |
| <i>IGFBP1</i>    | 1 | <b>0,219</b>  | <b>0,109</b> | <b>4E-02</b> |        |       |       | 1 | <b>0,063</b>  | <b>0,025</b> | <b>1E-02</b> |        |       |       |
| <i>INHBC</i>     | 1 | 0,150         | 0,084        | 7E-02        |        |       |       | 1 | 0,028         | 0,020        | 2E-01        |        |       |       |
| <i>LEAP2</i>     | 1 | -0,016        | 0,030        | 6E-01        |        |       |       | 1 | -0,005        | 0,007        | 5E-01        |        |       |       |
| <i>PRCP</i>      | 2 | -0,001        | 0,051        | 1E+00        |        |       |       | 2 | 0,021         | 0,012        | 9E-02        |        |       |       |
| <i>ADSSL1</i>    | 2 | -0,001        | 0,020        | 1E+00        |        |       |       | 2 | -0,004        | 0,005        | 3E-01        |        |       |       |
| <i>AGRN</i>      | 2 | -0,035        | 0,047        | 4E-01        |        |       |       | 2 | -0,017        | 0,012        | 2E-01        |        |       |       |
| <i>ASL</i>       | 1 | -0,008        | 0,076        | 9E-01        |        |       |       | 1 | -0,003        | 0,018        | 9E-01        |        |       |       |
| <i>GUSB</i>      | 1 | -0,037        | 0,061        | 5E-01        |        |       |       | 1 | <b>0,031</b>  | <b>0,014</b> | <b>3E-02</b> |        |       |       |
| <i>WFIKK2</i>    | 2 | 0,011         | 0,018        | 5E-01        |        |       |       | 2 | -0,007        | 0,004        | 1E-01        |        |       |       |
| <i>PCOLCE</i>    | 2 | 0,081         | 0,055        | 1E-01        |        |       |       | 2 | -0,010        | 0,012        | 4E-01        |        |       |       |
| <i>IL1RN</i>     | 2 | <b>0,060</b>  | <b>0,021</b> | <b>5E-03</b> |        |       |       | 2 | 0,003         | 0,005        | 5E-01        |        |       |       |
| <i>APOF</i>      | 2 | <b>-0,133</b> | <b>0,053</b> | <b>1E-02</b> |        |       |       | 2 | 0,018         | 0,021        | 4E-01        |        |       |       |
| <i>ACY1</i>      | 1 | <b>0,279</b>  | <b>0,120</b> | <b>2E-02</b> |        |       |       | 1 | 0,025         | 0,027        | 4E-01        |        |       |       |
| <i>CCDC126</i>   | 2 | <b>0,076</b>  | <b>0,033</b> | <b>2E-02</b> |        |       |       | 2 | 0,003         | 0,008        | 7E-01        |        |       |       |
| <i>ART3</i>      | 3 | <b>-0,058</b> | <b>0,026</b> | <b>2E-02</b> | -0,046 | 0,043 | 5E-01 | 3 | 0,002         | 0,010        | 8E-01        | -0,015 | 0,010 | 4E-01 |
| <i>ADAMTSL2</i>  | 4 | <b>-0,145</b> | <b>0,068</b> | <b>3E-02</b> | -0,449 | 0,255 | 2E-01 | 4 | 0,034         | 0,019        | 7E-02        | 0,004  | 0,073 | 1E+00 |
| <i>CADM2</i>     | 1 | <b>-0,136</b> | <b>0,063</b> | <b>3E-02</b> |        |       |       | 1 | -0,028        | 0,015        | 6E-02        |        |       |       |
| <i>RTN4R</i>     | 6 | <b>-0,047</b> | <b>0,023</b> | <b>4E-02</b> | -0,160 | 0,110 | 2E-01 | 6 | -0,003        | 0,005        | 6E-01        | -0,004 | 0,027 | 9E-01 |
| <i>ADH4</i>      | 1 | -0,005        | 0,021        | 8E-01        |        |       |       | 1 | <b>-0,017</b> | <b>0,005</b> | <b>4E-04</b> |        |       |       |
| <i>TLL1</i>      | 1 | -0,062        | 0,155        | 7E-01        |        |       |       | 1 | <b>0,095</b>  | <b>0,037</b> | <b>1E-02</b> |        |       |       |
| <i>AKR1C4</i>    | 1 | -0,013        | 0,012        | 3E-01        |        |       |       | 1 | <b>0,006</b>  | <b>0,003</b> | <b>3E-02</b> |        |       |       |
| <i>SERPINA11</i> | 4 | -0,008        | 0,027        | 8E-01        | 0,134  | 0,106 | 3E-01 | 4 | <b>-0,013</b> | <b>0,006</b> | <b>3E-02</b> | -0,004 | 0,025 | 9E-01 |
| <i>NPTXR</i>     | 3 | 0,014         | 0,018        | 4E-01        | 0,006  | 0,021 | 8E-01 | 3 | 0,007         | 0,004        | 7E-02        | 0,004  | 0,005 | 5E-01 |
| <i>HRSP12</i>    | 1 | -0,034        | 0,023        | 1E-01        |        |       |       | 1 | 0,008         | 0,005        | 1E-01        |        |       |       |
| <i>MYOC</i>      | 4 | 0,011         | 0,024        | 6E-01        | 0,094  | 0,042 | 2E-01 | 4 | -0,007        | 0,004        | 1E-01        | -0,004 | 0,012 | 8E-01 |



|                 |   |        |       |       |        |       |       |   |        |       |       |        |       |       |
|-----------------|---|--------|-------|-------|--------|-------|-------|---|--------|-------|-------|--------|-------|-------|
| <i>APOM</i>     | 3 | -0,041 | 0,045 | 4E-01 | 0,018  | 0,077 | 9E-01 | 3 | -0,024 | 0,016 | 1E-01 | -0,026 | 0,039 | 6E-01 |
| <i>HTRA1</i>    | 2 | -0,035 | 0,057 | 5E-01 |        |       |       | 2 | -0,019 | 0,013 | 2E-01 |        |       |       |
| <i>DSG2</i>     | 3 | -0,005 | 0,042 | 9E-01 | -0,091 | 0,098 | 5E-01 | 3 | -0,013 | 0,010 | 2E-01 | -0,004 | 0,023 | 9E-01 |
| <i>IGFBP2</i>   | 2 | 0,093  | 0,168 | 6E-01 |        |       |       | 2 | -0,023 | 0,019 | 2E-01 |        |       |       |
| <i>SLITRK5</i>  | 4 | 0,050  | 0,048 | 3E-01 | 0,140  | 0,259 | 6E-01 | 4 | -0,013 | 0,011 | 3E-01 | -0,003 | 0,060 | 1E+00 |
| <i>SLITRK3</i>  | 4 | -0,030 | 0,025 | 2E-01 | -0,041 | 0,037 | 4E-01 | 4 | -0,012 | 0,010 | 3E-01 | -0,011 | 0,019 | 6E-01 |
| <i>CPM</i>      | 3 | -0,075 | 0,093 | 4E-01 | -0,119 | 0,510 | 9E-01 | 3 | 0,018  | 0,016 | 3E-01 | 0,065  | 0,063 | 5E-01 |
| <i>CHAD</i>     | 1 | -0,150 | 0,158 | 3E-01 |        |       |       | 1 | -0,040 | 0,037 | 3E-01 |        |       |       |
| <i>SCG3</i>     | 2 | 0,000  | 0,012 | 1E+00 |        |       |       | 2 | 0,004  | 0,004 | 3E-01 |        |       |       |
| <i>MET</i>      | 2 | -0,062 | 0,068 | 4E-01 |        |       |       | 2 | 0,017  | 0,016 | 3E-01 |        |       |       |
| <i>SEZ6L</i>    | 4 | -0,013 | 0,110 | 9E-01 | 0,091  | 0,385 | 8E-01 | 4 | 0,025  | 0,024 | 3E-01 | -0,019 | 0,071 | 8E-01 |
| <i>EFNB2</i>    | 2 | -0,028 | 0,044 | 5E-01 |        |       |       | 2 | 0,011  | 0,011 | 3E-01 |        |       |       |
| <i>THBS2</i>    | 8 | -0,019 | 0,018 | 3E-01 | -0,008 | 0,024 | 7E-01 | 8 | -0,004 | 0,004 | 4E-01 | -0,006 | 0,005 | 3E-01 |
| <i>SLITRK6</i>  | 1 | -0,014 | 0,054 | 8E-01 |        |       |       | 1 | -0,012 | 0,013 | 4E-01 |        |       |       |
| <i>FBP1</i>     | 2 | 0,063  | 0,038 | 9E-02 |        |       |       | 2 | -0,008 | 0,009 | 4E-01 |        |       |       |
| <i>PTPRU</i>    | 3 | 0,009  | 0,037 | 8E-01 | -0,072 | 0,118 | 7E-01 | 3 | -0,007 | 0,009 | 4E-01 | -0,039 | 0,032 | 4E-01 |
| <i>CRTAC1</i>   | 6 | 0,007  | 0,025 | 8E-01 | -0,088 | 0,051 | 2E-01 | 6 | -0,004 | 0,005 | 4E-01 | 0,008  | 0,012 | 5E-01 |
| <i>VOPPI</i>    | 2 | 0,089  | 0,061 | 1E-01 |        |       |       | 2 | 0,018  | 0,022 | 4E-01 |        |       |       |
| <i>LGALS3BP</i> | 4 | 0,066  | 0,081 | 4E-01 | 0,250  | 0,134 | 2E-01 | 4 | -0,012 | 0,015 | 4E-01 | 0,010  | 0,036 | 8E-01 |
| <i>PLAT</i>     | 1 | 0,009  | 0,056 | 9E-01 |        |       |       | 1 | -0,011 | 0,014 | 4E-01 |        |       |       |
| <i>COL11A2</i>  | 2 | -0,011 | 0,021 | 6E-01 |        |       |       | 2 | 0,004  | 0,005 | 4E-01 |        |       |       |
| <i>PTPRS</i>    | 1 | -0,120 | 0,135 | 4E-01 |        |       |       | 1 | -0,026 | 0,037 | 5E-01 |        |       |       |
| <i>SLITRK1</i>  | 1 | -0,026 | 0,153 | 9E-01 |        |       |       | 1 | 0,025  | 0,036 | 5E-01 |        |       |       |
| <i>TMEM9</i>    | 1 | -0,046 | 0,131 | 7E-01 |        |       |       | 1 | 0,019  | 0,030 | 5E-01 |        |       |       |
| <i>MXRA8</i>    | 1 | -0,109 | 0,124 | 4E-01 |        |       |       | 1 | 0,019  | 0,030 | 5E-01 |        |       |       |
| <i>SORD</i>     | 3 | 0,066  | 0,057 | 2E-01 | -0,341 | 0,419 | 6E-01 | 3 | 0,007  | 0,011 | 5E-01 | 0,005  | 0,083 | 1E+00 |
| <i>FTCD</i>     | 1 | -0,036 | 0,036 | 3E-01 |        |       |       | 1 | -0,005 | 0,009 | 5E-01 |        |       |       |

|                  |   |        |       |       |        |       |       |   |        |       |       |        |       |       |
|------------------|---|--------|-------|-------|--------|-------|-------|---|--------|-------|-------|--------|-------|-------|
| <i>EPHB6</i>     | 1 | 0,003  | 0,017 | 9E-01 |        |       |       | 1 | -0,002 | 0,004 | 6E-01 |        |       |       |
| <i>ANTXR2</i>    | 2 | -0,007 | 0,075 | 9E-01 |        |       |       | 2 | -0,004 | 0,009 | 7E-01 |        |       |       |
| <i>ADIPOQ</i>    | 5 | -0,040 | 0,028 | 1E-01 | -0,031 | 0,049 | 6E-01 | 5 | 0,003  | 0,007 | 7E-01 | 0,016  | 0,010 | 2E-01 |
| <i>TIMP4</i>     | 3 | 0,075  | 0,048 | 1E-01 | -0,040 | 0,099 | 8E-01 | 3 | 0,010  | 0,023 | 7E-01 | -0,046 | 0,050 | 5E-01 |
| <i>GPR56</i>     | 1 | 0,084  | 0,140 | 5E-01 |        |       |       | 1 | -0,013 | 0,031 | 7E-01 |        |       |       |
| <i>SERPINB13</i> | 1 | 0,008  | 0,070 | 9E-01 |        |       |       | 1 | -0,007 | 0,017 | 7E-01 |        |       |       |
| <i>ST3GAL1</i>   | 3 | 0,000  | 0,033 | 1E+00 | 0,058  | 0,079 | 6E-01 | 3 | 0,003  | 0,008 | 7E-01 | -0,003 | 0,019 | 9E-01 |
| <i>GHR</i>       | 2 | -0,004 | 0,038 | 9E-01 |        |       |       | 2 | -0,003 | 0,008 | 7E-01 |        |       |       |
| <i>IL18R1</i>    | 2 | 0,021  | 0,081 | 8E-01 |        |       |       | 2 | -0,006 | 0,018 | 7E-01 |        |       |       |
| <i>APLP1</i>     | 1 | 0,031  | 0,087 | 7E-01 |        |       |       | 1 | -0,007 | 0,020 | 7E-01 |        |       |       |
| <i>GPD1</i>      | 1 | -0,044 | 0,077 | 6E-01 |        |       |       | 1 | 0,006  | 0,018 | 8E-01 |        |       |       |
| <i>MPO</i>       | 4 | 0,031  | 0,036 | 4E-01 | -0,080 | 0,067 | 4E-01 | 4 | 0,002  | 0,008 | 8E-01 | -0,015 | 0,017 | 5E-01 |
| <i>RGMB</i>      | 2 | -0,009 | 0,026 | 7E-01 |        |       |       | 2 | -0,001 | 0,006 | 8E-01 |        |       |       |
| <i>PCDH10</i>    | 2 | -0,016 | 0,036 | 7E-01 |        |       |       | 2 | -0,002 | 0,008 | 8E-01 |        |       |       |
| <i>UNC5D</i>     | 2 | 0,013  | 0,029 | 7E-01 |        |       |       | 2 | -0,001 | 0,007 | 9E-01 |        |       |       |
| <i>FAM20B</i>    | 2 | 0,134  | 0,096 | 2E-01 |        |       |       | 2 | 0,002  | 0,014 | 9E-01 |        |       |       |
| <i>ASGR1</i>     | 2 | 0,000  | 0,066 | 1E+00 |        |       |       | 2 | -0,002 | 0,013 | 9E-01 |        |       |       |
| <i>AMY2A</i>     | 4 | 0,004  | 0,018 | 8E-01 | 0,006  | 0,030 | 9E-01 | 4 | -0,001 | 0,004 | 9E-01 | 0,007  | 0,007 | 4E-01 |
| <i>LRRC15</i>    | 3 | 0,032  | 0,024 | 2E-01 | 0,056  | 0,057 | 5E-01 | 3 | -0,001 | 0,008 | 9E-01 | 0,017  | 0,019 | 5E-01 |
| <i>ADAMTSL1</i>  | 8 | 0,004  | 0,030 | 9E-01 | -0,041 | 0,038 | 3E-01 | 8 | 0,000  | 0,006 | 9E-01 | 0,006  | 0,009 | 6E-01 |
| <i>CES1</i>      | 1 | 0,040  | 0,063 | 5E-01 |        |       |       | 1 | 0,000  | 0,015 | 1E+00 |        |       |       |
| <i>NFASC</i>     | 4 | -0,019 | 0,023 | 4E-01 | -0,014 | 0,040 | 8E-01 | 4 | 0,000  | 0,006 | 1E+00 | 0,006  | 0,010 | 6E-01 |

**SUPPLEMENTAL TABLE 7: Aptamer-specific genetic instruments included in Two-sample Mendelian Randomization analysis**

| Aptamer ID | Gene Symbol | Target Protein Name                   | SNP         | SNP incorporated as an instrument in analysis of: |                              |                    |                             |                              |
|------------|-------------|---------------------------------------|-------------|---------------------------------------------------|------------------------------|--------------------|-----------------------------|------------------------------|
|            |             |                                       |             | Diabetes*                                         | Fasting Glucose <sup>†</sup> | HbA1c <sup>†</sup> | 2-Hour Glucose <sup>†</sup> | Fasting Insulin <sup>†</sup> |
| 3343-1     | ACY1        | Aminoacylase-1                        | rs150416778 | yes                                               | yes                          | yes                | yes                         | yes                          |
| 16890-37   | ADAMTSL1    | ADAMTS-like protein 1                 | rs10963680  | yes                                               | yes                          | yes                | yes                         | yes                          |
| 16890-37   | ADAMTSL1    | ADAMTS-like protein 1                 | rs146084664 | yes                                               | yes                          | yes                | yes                         | yes                          |
| 16890-37   | ADAMTSL1    | ADAMTS-like protein 1                 | rs1755286   | yes                                               | yes                          | yes                | yes                         | yes                          |
| 16890-37   | ADAMTSL1    | ADAMTS-like protein 1                 | rs1856894   | yes                                               | yes                          | yes                | yes                         | yes                          |
| 16890-37   | ADAMTSL1    | ADAMTS-like protein 1                 | rs35264941  | yes                                               | yes                          | yes                | yes                         | yes                          |
| 16890-37   | ADAMTSL1    | ADAMTS-like protein 1                 | rs575507    | yes                                               | yes                          | yes                | yes                         | yes                          |
| 16890-37   | ADAMTSL1    | ADAMTS-like protein 1                 | rs702208    | yes                                               | yes                          | yes                | yes                         | yes                          |
| 16890-37   | ADAMTSL1    | ADAMTS-like protein 1                 | rs776760    | yes                                               | yes                          | yes                | yes                         | yes                          |
| 6379-62    | ADAMTSL2    | ADAMTS-like protein 2                 | rs10120207  | yes                                               | yes                          | yes                | yes                         | yes                          |
| 6379-62    | ADAMTSL2    | ADAMTS-like protein 2                 | rs11534419  | yes                                               | yes                          | yes                | yes                         | yes                          |
| 6379-62    | ADAMTSL2    | ADAMTS-like protein 2                 | rs56355857  | yes                                               | yes                          | yes                | yes                         | yes                          |
| 6379-62    | ADAMTSL2    | ADAMTS-like protein 2                 | rs62574238  | no                                                | yes                          | yes                | yes                         | yes                          |
| 15525-294  | ADH1C       | Alcohol dehydrogenase 1C              | rs283415    | yes                                               | yes                          | yes                | yes                         | yes                          |
| 8325-37    | ADH4        | Alcohol dehydrogenase 4               | rs6858148   | yes                                               | yes                          | yes                | yes                         | yes                          |
| 3554-24    | ADIPOQ      | Adiponectin                           | rs143257534 | yes                                               | yes                          | yes                | yes                         | yes                          |
| 3554-24    | ADIPOQ      | Adiponectin                           | rs17300539  | yes                                               | yes                          | yes                | yes                         | yes                          |
| 3554-24    | ADIPOQ      | Adiponectin                           | rs17366653  | yes                                               | yes                          | yes                | yes                         | yes                          |
| 3554-24    | ADIPOQ      | Adiponectin                           | rs266770    | yes                                               | yes                          | yes                | yes                         | yes                          |
| 3554-24    | ADIPOQ      | Adiponectin                           | rs7616259   | yes                                               | yes                          | yes                | yes                         | yes                          |
| 13998-26   | ADSSL1      | Adenylosuccinate synthetase isozyme 1 | rs3001371   | yes                                               | yes                          | yes                | yes                         | yes                          |
| 13998-26   | ADSSL1      | Adenylosuccinate synthetase isozyme 1 | rs72715968  | yes                                               | yes                          | yes                | yes                         | yes                          |
| 15483-377  | AGRN        | Agrin                                 | rs4970394   | yes                                               | yes                          | yes                | yes                         | yes                          |
| 15483-377  | AGRN        | Agrin                                 | rs189343112 | no                                                | yes                          | yes                | yes                         | yes                          |

|           |        |                                        |             |     |     |     |     |     |
|-----------|--------|----------------------------------------|-------------|-----|-----|-----|-----|-----|
| 18397-5   | AKR1C4 | Aldo-keto reductase family 1 member C4 | rs75811842  | yes | yes | yes | yes | yes |
| 18185-118 | ALDOB  | Fructose-bisphosphate aldolase B       | rs142540788 | yes | yes | yes | yes | yes |
| 18917-53  | AMY2A  | Pancreatic alpha-amylase               | rs77729677  | yes | yes | yes | yes | yes |
| 18917-53  | AMY2A  | Pancreatic alpha-amylase               | rs78245241  | yes | yes | yes | yes | yes |
| 18917-53  | AMY2A  | Pancreatic alpha-amylase               | rs7524694   | yes | yes | yes | yes | yes |
| 18917-53  | AMY2A  | Pancreatic alpha-amylase               | rs191765977 | no  | yes | yes | yes | yes |
| 15556-49  | AMY2B  | Alpha-amylase 2B                       | rs114922930 | yes | yes | yes | yes | yes |
| 15556-49  | AMY2B  | Alpha-amylase 2B                       | rs12751859  | yes | yes | yes | yes | yes |
| 15556-49  | AMY2B  | Alpha-amylase 2B                       | rs140942684 | yes | yes | yes | yes | yes |
| 15556-49  | AMY2B  | Alpha-amylase 2B                       | rs150062710 | yes | yes | yes | yes | yes |
| 15556-49  | AMY2B  | Alpha-amylase 2B                       | rs77729677  | yes | yes | yes | yes | yes |
| 15556-49  | AMY2B  | Alpha-amylase 2B                       | rs78245241  | yes | yes | yes | yes | yes |
| 15556-49  | AMY2B  | Alpha-amylase 2B                       | rs79456674  | yes | yes | yes | yes | yes |
| 15559-5   | ANTXR2 | Anthrax toxin receptor 2               | rs11098925  | yes | yes | yes | yes | yes |
| 15559-5   | ANTXR2 | Anthrax toxin receptor 2               | rs7674623   | yes | yes | yes | yes | yes |
| 7210-25   | APLP1  | Amyloid-like protein 1                 | rs58291714  | yes | yes | yes | yes | yes |
| 12370-30  | APOF   | Apolipoprotein F                       | rs11575222  | yes | yes | yes | yes | yes |
| 12370-30  | APOF   | Apolipoprotein F                       | rs2020854   | yes | yes | yes | yes | yes |
| 10445-20  | APOM   | Apolipoprotein M                       | rs2260000   | yes | yes | yes | yes | yes |
| 10445-20  | APOM   | Apolipoprotein M                       | rs2894186   | yes | no  | no  | no  | no  |
| 10445-20  | APOM   | Apolipoprotein M                       | rs805295    | yes | yes | yes | yes | yes |
| 10445-20  | APOM   | Apolipoprotein M                       | rs550671    | no  | yes | yes | yes | yes |
| 7970-315  | ART3   | Ecto-ADP-ribosyltransferase 3          | rs4599438   | yes | yes | yes | yes | yes |
| 7970-315  | ART3   | Ecto-ADP-ribosyltransferase 3          | rs4859610   | yes | yes | yes | yes | yes |
| 7970-315  | ART3   | Ecto-ADP-ribosyltransferase 3          | rs187119299 | no  | yes | yes | yes | yes |
| 5452-71   | ASGR1  | Asialoglycoprotein receptor 1          | rs552653    | yes | yes | yes | yes | yes |
| 5452-71   | ASGR1  | Asialoglycoprotein receptor 1          | rs62061425  | yes | yes | yes | yes | yes |
| 11241-8   | ASL    | Argininosuccinate lyase                | rs10255397  | yes | yes | yes | yes | yes |

|           |         |                                           |             |     |     |     |     |     |
|-----------|---------|-------------------------------------------|-------------|-----|-----|-----|-----|-----|
| 16907-3   | CADM2   | Cell adhesion molecule 2                  | rs9880919   | yes | yes | yes | yes | yes |
| 6388-21   | CCDC126 | Coiled-coil domain-containing protein 126 | rs76363413  | yes | yes | yes | yes | yes |
| 6388-21   | CCDC126 |                                           | rs7781145   | yes | yes | yes | yes | yes |
| 15487-164 | CES1    | Liver carboxylesterase 1                  | rs76336259  | yes | yes | yes | yes | yes |
| 13460-4   | CHAD    | Chondroadherin                            | rs28590506  | yes | yes | yes | yes | yes |
| 11278-4   | COL11A2 | Collagen alpha-2(XI) chain                | rs144092339 | yes | yes | yes | yes | yes |
| 11278-4   | COL11A2 | Collagen alpha-2(XI) chain                | rs3129205   | yes | yes | yes | yes | yes |
| 9416-77   | CPM     | Carboxypeptidase M                        | rs10450797  | yes | yes | yes | yes | yes |
| 9416-77   | CPM     | Carboxypeptidase M                        | rs10878881  | yes | yes | yes | yes | yes |
| 9416-77   | CPM     | Carboxypeptidase M                        | rs1908671   | yes | yes | yes | yes | yes |
| 5632-6    | CRTAC1  | Cartilage acidic protein 1                | rs117781346 | yes | yes | yes | yes | yes |
| 5632-6    | CRTAC1  | Cartilage acidic protein 1                | rs505699    | yes | yes | yes | yes | yes |
| 5632-6    | CRTAC1  | Cartilage acidic protein 1                | rs56007204  | yes | yes | yes | yes | yes |
| 5632-6    | CRTAC1  | Cartilage acidic protein 1                | rs684225    | yes | yes | yes | yes | yes |
| 5632-6    | CRTAC1  | Cartilage acidic protein 1                | rs79737742  | yes | yes | yes | yes | yes |
| 5632-6    | CRTAC1  | Cartilage acidic protein 1                | rs894376    | yes | yes | yes | yes | yes |
| 9484-75   | DSG2    | Desmoglein-2                              | rs12373441  | yes | yes | yes | yes | yes |
| 9484-75   | DSG2    | Desmoglein-2                              | rs147145691 | yes | yes | yes | yes | yes |
| 9484-75   | DSG2    | Desmoglein-2                              | rs9304098   | yes | yes | yes | yes | yes |
| 14131-37  | EFNB2   | Ephrin-B2                                 | rs2774201   | yes | yes | yes | yes | yes |
| 14131-37  | EFNB2   | Ephrin-B2                                 | rs59166663  | yes | yes | yes | yes | yes |
| 5078-82   | EPHB6   | Ephrin type-B receptor 6                  | rs7789303   | yes | yes | yes | yes | yes |
| 7198-197  | FAM20B  | Glycosaminoglycan xylosylkinase           | rs45499094  | yes | yes | yes | yes | yes |
| 7198-197  | FAM20B  | Glycosaminoglycan xylosylkinase           | rs67498652  | yes | yes | yes | yes | yes |
| 7206-20   | FBP1    | Fructose-1,6-bisphosphatase 1             | rs2987899   | yes | yes | yes | yes | yes |
| 7206-20   | FBP1    | Fructose-1,6-bisphosphatase 1             | rs4743962   | yes | yes | yes | yes | yes |
| 9213-24   | FTCD    | Formimidoyltransferase-cyclodeaminase     | rs61735836  | yes | yes | yes | yes | yes |
| 2948-58   | GHR     | Growth hormone receptor                   | rs4610468   | yes | yes | yes | yes | yes |

|          |          |                                                          |             |     |     |     |     |     |
|----------|----------|----------------------------------------------------------|-------------|-----|-----|-----|-----|-----|
| 2948-58  | GHR      | Growth hormone receptor                                  | rs62372052  | yes | yes | yes | yes | yes |
| 13697-51 | GPD1     | Glycerol-3-phosphate dehydrogenase [NAD(+)], cytoplasmic | rs78089413  | yes | yes | yes | yes | yes |
| 18893-26 | GPR56    | Adhesion G-protein coupled receptor G1                   | rs11076197  | yes | yes | yes | yes | yes |
| 15562-24 | GUSB     | Beta-glucuronidase                                       | rs9530      | yes | yes | yes | yes | yes |
| 14636-25 | HRSP12   | Ribonuclease UK114                                       | rs10955148  | yes | yes | yes | yes | yes |
| 15594-47 | HTRA1    | Serine protease HTRA1                                    | rs61871680  | yes | yes | yes | yes | yes |
| 15594-47 | HTRA1    | Serine protease HTRA1                                    | rs76579910  | yes | yes | yes | yes | yes |
| 2771-35  | IGFBP1   | Insulin-like growth factor-binding protein 1             | rs3828998   | yes | yes | yes | yes | yes |
| 8469-41  | IGFBP2   | Insulin-like growth factor-binding protein 2             | rs4674091   | yes | yes | yes | yes | yes |
| 8469-41  | IGFBP2   | Insulin-like growth factor-binding protein 2             | rs4674100   | yes | yes | yes | yes | yes |
| 2950-57  | IGFBP4   | Insulin-like growth factor-binding protein 4             | rs4890114   | yes | yes | yes | yes | yes |
| 14079-14 | IL18R1   | Interleukin-18 receptor 1                                | rs13014644  | yes | yes | yes | yes | yes |
| 14079-14 | IL18R1   | Interleukin-18 receptor 1                                | rs3752659   | yes | yes | yes | yes | yes |
| 5353-89  | IL1RN    | Interleukin-1 receptor antagonist protein                | rs1530552   | yes | yes | yes | yes | yes |
| 5353-89  | IL1RN    | Interleukin-1 receptor antagonist protein                | rs55709272  | yes | yes | yes | yes | yes |
| 6408-2   | INHBC    | Inhibin beta C chain                                     | rs3809113   | yes | yes | yes | yes | yes |
| 5708-1   | LEAP2    | Liver-expressed antimicrobial peptide 2                  | rs12515756  | yes | yes | yes | yes | yes |
| 5000-52  | LGALS3BP | Galectin-3-binding protein                               | rs3826311   | yes | yes | yes | yes | yes |
| 5000-52  | LGALS3BP | Galectin-3-binding protein                               | rs4789938   | yes | yes | yes | yes | yes |
| 5000-52  | LGALS3BP | Galectin-3-binding protein                               | rs60653700  | yes | yes | yes | yes | yes |
| 5000-52  | LGALS3BP | Galectin-3-binding protein                               | rs566419452 | no  | yes | yes | yes | yes |
| 6557-50  | LRRC15   | Leucine-rich repeat-containing protein 15                | rs4974524   | yes | yes | yes | yes | yes |
| 6557-50  | LRRC15   | Leucine-rich repeat-containing protein 15                | rs58182031  | yes | yes | yes | yes | yes |
| 6557-50  | LRRC15   | Leucine-rich repeat-containing protein 15                | rs73081778  | yes | yes | yes | yes | yes |
| 2837-3   | MET      | Hepatocyte growth factor receptor                        | rs10435378  | yes | yes | yes | yes | yes |
| 2837-3   | MET      | Hepatocyte growth factor receptor                        | rs79326908  | yes | yes | yes | yes | yes |
| 2580-83  | MPO      | Myeloperoxidase                                          | rs2333227   | yes | yes | yes | yes | yes |

|           |        |                                        |             |     |     |     |     |     |
|-----------|--------|----------------------------------------|-------------|-----|-----|-----|-----|-----|
| 2580-83   | MPO    | Myeloperoxidase                        | rs34097845  | yes | yes | yes | yes | yes |
| 2580-83   | MPO    | Myeloperoxidase                        | rs79141987  | yes | yes | yes | yes | yes |
| 2580-83   | MPO    | Myeloperoxidase                        | rs146148297 | no  | yes | yes | yes | yes |
| 10521-10  | MXRA8  | Matrix-remodeling-associated protein 8 | rs181929025 | yes | yes | yes | yes | yes |
| 16558-2   | MYOC   | Myocilin                               | rs2232826   | yes | yes | yes | yes | yes |
| 16558-2   | MYOC   | Myocilin                               | rs235922    | yes | yes | yes | yes | yes |
| 16558-2   | MYOC   | Myocilin                               | rs7547721   | yes | yes | yes | yes | yes |
| 16558-2   | MYOC   | Myocilin                               | rs79495172  | yes | yes | yes | yes | yes |
| 15573-110 | NCAN   | Neurocan core protein                  | rs2228603   | yes | yes | yes | yes | yes |
| 13109-82  | NEGR1  | Neuronal growth regulator 1            | rs11209871  | yes | yes | yes | yes | yes |
| 13109-82  | NEGR1  | Neuronal growth regulator 1            | rs1194278   | yes | yes | yes | yes | yes |
| 7050-5    | NEGR1  | Neuronal growth regulator 1            | rs1194282   | yes | yes | yes | yes | yes |
| 7179-69   | NFASC  | Neurofascin                            | rs12036722  | yes | yes | yes | yes | yes |
| 7179-69   | NFASC  | Neurofascin                            | rs16854533  | yes | yes | yes | yes | yes |
| 7179-69   | NFASC  | Neurofascin                            | rs3892308   | yes | yes | yes | yes | yes |
| 7179-69   | NFASC  | Neurofascin                            | rs6667532   | yes | yes | yes | yes | yes |
| 15511-37  | NPTXR  | Neuronal pentraxin receptor            | rs12628473  | yes | yes | yes | yes | yes |
| 15511-37  | NPTXR  | Neuronal pentraxin receptor            | rs74925227  | yes | yes | yes | yes | yes |
| 15511-37  | NPTXR  | Neuronal pentraxin receptor            | rs9607582   | yes | yes | yes | yes | yes |
| 16908-5   | OMG    | Oligodendrocyte-myelin glycoprotein    | rs12449302  | yes | yes | yes | yes | yes |
| 9018-38   | PCDH10 | Protocadherin-10                       | rs28477738  | yes | yes | yes | yes | yes |
| 9018-38   | PCDH10 | Protocadherin-10                       | rs4864200   | yes | yes | yes | yes | yes |
| 11237-49  | PCOLCE | Procollagen C-endopeptidase enhancer 1 | rs7385804   | yes | yes | yes | yes | yes |
| 11237-49  | PCOLCE | Procollagen C-endopeptidase enhancer 1 | rs77227535  | yes | yes | yes | yes | yes |
| 2212-69   | PLAT   | Tissue-type plasminogen activator      | rs2020921   | yes | yes | yes | yes | yes |
| 9216-100  | PLXNB2 | Plexin-B2                              | rs11547731  | yes | yes | yes | yes | yes |
| 9216-100  | PLXNB2 | Plexin-B2                              | rs28540713  | yes | yes | yes | yes | yes |
| 9216-100  | PLXNB2 | Plexin-B2                              | rs28573806  | yes | yes | yes | yes | yes |

|          |           |                                              |             |     |     |     |     |     |
|----------|-----------|----------------------------------------------|-------------|-----|-----|-----|-----|-----|
| 5722-78  | PRCP      | Lysosomal Pro-X carboxypeptidase             | rs2229437   | yes | yes | yes | yes | yes |
| 5722-78  | PRCP      | Lysosomal Pro-X carboxypeptidase             | rs188172480 | no  | yes | yes | yes | yes |
| 6049-64  | PTPRS     | Receptor-type tyrosine-protein phosphatase S | rs55763631  | yes | yes | yes | yes | yes |
| 8337-65  | PTPRU     | Receptor-type tyrosine-protein phosphatase U | rs2179795   | yes | yes | yes | yes | yes |
| 8337-65  | PTPRU     | Receptor-type tyrosine-protein phosphatase U | rs67827535  | yes | yes | yes | yes | yes |
| 8337-65  | PTPRU     | Receptor-type tyrosine-protein phosphatase U | rs2377362   | no  | yes | yes | yes | yes |
| 3331-8   | RGMB      | RGM domain family member B                   | rs17663317  | yes | yes | yes | yes | yes |
| 3331-8   | RGMB      | RGM domain family member B                   | rs2368553   | yes | yes | yes | yes | yes |
| 5105-2   | RTN4R     | Reticulon-4 receptor                         | rs665780    | yes | yes | yes | yes | yes |
| 5105-2   | RTN4R     | Reticulon-4 receptor                         | rs696880    | yes | yes | yes | yes | yes |
| 5105-2   | RTN4R     | Reticulon-4 receptor                         | rs75765     | yes | yes | yes | yes | yes |
| 5105-2   | RTN4R     | Reticulon-4 receptor                         | rs8142885   | yes | yes | yes | yes | yes |
| 5105-2   | RTN4R     | Reticulon-4 receptor                         | rs9606293   | yes | yes | yes | yes | yes |
| 5105-2   | RTN4R     | Reticulon-4 receptor                         | rs73153000  | no  | yes | yes | yes | yes |
| 7957-2   | SCG3      | Secretogranin-3                              | rs2305710   | yes | yes | yes | yes | yes |
| 7957-2   | SCG3      | Secretogranin-3                              | rs2607116   | yes | yes | yes | yes | yes |
| 9002-36  | SERPINA11 | Serpin A11                                   | rs1956713   | yes | yes | yes | yes | yes |
| 9002-36  | SERPINA11 | Serpin A11                                   | rs2038499   | yes | yes | yes | yes | yes |
| 9002-36  | SERPINA11 | Serpin A11                                   | rs4900235   | yes | yes | yes | yes | yes |
| 9002-36  | SERPINA11 | Serpin A11                                   | rs72631635  | yes | yes | yes | yes | yes |
| 18841-1  | SERPINB13 | Serpin B13                                   | rs77157727  | yes | yes | yes | yes | yes |
| 19563-3  | SEZ6L     | Seizure 6-like protein                       | rs117966464 | yes | yes | yes | yes | yes |
| 19563-3  | SEZ6L     | Seizure 6-like protein                       | rs188357839 | yes | yes | yes | yes | yes |
| 19563-3  | SEZ6L     | Seizure 6-like protein                       | rs73158619  | yes | yes | yes | yes | yes |
| 19563-3  | SEZ6L     | Seizure 6-like protein                       | rs7293127   | no  | yes | yes | yes | yes |
| 4929-55  | SHBG      | Sex hormone-binding globulin                 | rs858519    | yes | yes | yes | yes | yes |
| 15539-15 | SLITRK1   | SLIT and NTRK-like protein 1                 | rs2876803   | yes | yes | yes | yes | yes |
| 10565-19 | SLITRK3   | SLIT and NTRK-like protein 3                 | rs114097740 | yes | yes | yes | yes | yes |



|          |         |                                                                          |             |     |     |     |     |     |
|----------|---------|--------------------------------------------------------------------------|-------------|-----|-----|-----|-----|-----|
| 10565-19 | SLITRK3 | SLIT and NTRK-like protein 3                                             | rs4858792   | yes | yes | yes | yes | yes |
| 10565-19 | SLITRK3 | SLIT and NTRK-like protein 3                                             | rs62282372  | yes | yes | yes | yes | yes |
| 10565-19 | SLITRK3 | SLIT and NTRK-like protein 3                                             | rs78729408  | yes | yes | yes | yes | yes |
| 4568-17  | SLITRK5 | SLIT and NTRK-like protein 5                                             | rs117858373 | yes | yes | yes | yes | yes |
| 4568-17  | SLITRK5 | SLIT and NTRK-like protein 5                                             | rs12877225  | yes | yes | yes | yes | yes |
| 4568-17  | SLITRK5 | SLIT and NTRK-like protein 5                                             | rs9588027   | yes | yes | yes | yes | yes |
| 4568-17  | SLITRK5 | SLIT and NTRK-like protein 5                                             | rs9523380   | no  | yes | yes | yes | yes |
| 16916-19 | SLITRK6 | SLIT and NTRK-like protein 6                                             | rs9547175   | yes | yes | yes | yes | yes |
| 15447-45 | SORD    | Sorbitol dehydrogenase                                                   | rs111459698 | yes | yes | yes | yes | yes |
| 15447-45 | SORD    | Sorbitol dehydrogenase                                                   | rs11638723  | yes | yes | yes | yes | yes |
| 15447-45 | SORD    | Sorbitol dehydrogenase                                                   | rs72722045  | yes | yes | yes | yes | yes |
| 5657-28  | ST3GAL1 | CMP-N-acetylneuraminate-beta-galactosamide-alpha-2,3-sialyltransferase 1 | rs4736683   | yes | yes | yes | yes | yes |
| 5657-28  | ST3GAL1 |                                                                          | rs62520289  | yes | yes | yes | yes | yes |
| 5657-28  | ST3GAL1 |                                                                          | rs9643300   | yes | yes | yes | yes | yes |
| 3009-3   | TGFBR3  | Transforming growth factor beta receptor type 3                          | rs55649112  | yes | yes | yes | yes | yes |
| 3339-33  | THBS2   | Thrombospondin-2                                                         | rs12174547  | yes | yes | yes | yes | yes |
| 3339-33  | THBS2   | Thrombospondin-2                                                         | rs3252      | yes | yes | yes | yes | yes |
| 3339-33  | THBS2   | Thrombospondin-2                                                         | rs35239983  | yes | yes | yes | yes | yes |
| 3339-33  | THBS2   | Thrombospondin-2                                                         | rs62435801  | yes | yes | yes | yes | yes |
| 3339-33  | THBS2   | Thrombospondin-2                                                         | rs73234350  | yes | yes | yes | yes | yes |
| 3339-33  | THBS2   | Thrombospondin-2                                                         | rs74507247  | yes | yes | yes | yes | yes |
| 3339-33  | THBS2   | Thrombospondin-2                                                         | rs78362595  | yes | yes | yes | yes | yes |
| 3339-33  | THBS2   | Thrombospondin-2                                                         | rs8089      | yes | yes | yes | yes | yes |
| 6462-12  | TIMP4   | Metalloproteinase inhibitor 4                                            | rs184262    | yes | yes | yes | yes | yes |
| 6462-12  | TIMP4   | Metalloproteinase inhibitor 4                                            | rs2120825   | yes | yes | yes | yes | yes |
| 6462-12  | TIMP4   | Metalloproteinase inhibitor 4                                            | rs3773364   | yes | yes | yes | yes | yes |
| 6383-90  | TLL1    | Tolloid-like protein 1                                                   | rs1903176   | yes | yes | yes | yes | yes |
| 9249-17  | TMEM9   | Transmembrane protein 9                                                  | rs4915486   | yes | yes | yes | yes | yes |

|          |         |                                                 |             |     |     |     |     |     |
|----------|---------|-------------------------------------------------|-------------|-----|-----|-----|-----|-----|
| 5036-50  | TNFAIP6 | Tumor necrosis factor-inducible gene 6 protein  | rs114322406 | yes | yes | yes | yes | yes |
| 5036-50  | TNFAIP6 | Tumor necrosis factor-inducible gene 6 protein  | rs12621525  | yes | yes | yes | yes | yes |
| 5036-50  | TNFAIP6 | Tumor necrosis factor-inducible gene 6 protein  | rs2278089   | yes | yes | yes | yes | yes |
| 5036-50  | TNFAIP6 | Tumor necrosis factor-inducible gene 6 protein  | rs77964389  | yes | yes | yes | yes | yes |
| 5939-42  | TNFSF12 | Tumor necrosis factor ligand superfamily        | rs77711855  | yes | yes | yes | yes | yes |
| 5939-42  | TNFSF12 | member 12                                       | rs80067372  | yes | yes | yes | yes | yes |
| 16307-22 | UNC5D   | Netrin receptor UNC5D                           | rs3108622   | yes | yes | yes | yes | yes |
| 16307-22 | UNC5D   | Netrin receptor UNC5D                           | rs7833421   | yes | yes | yes | yes | yes |
| 14618-26 | VOPP1   | Vesicular, overexpressed in cancer, prosurvival | rs117042408 | yes | yes | yes | yes | yes |
| 14618-26 | VOPP1   | protein 1                                       | rs9642585   | yes | yes | yes | yes | yes |
| 3235-50  | WFIKKN2 | WAP, Kazal, immunoglobulin, Kunitz and NTR      | rs11079936  | yes | yes | yes | yes | yes |
| 3235-50  | WFIKKN2 | domain-containing protein 2                     | rs17564787  | yes | yes | yes | yes | yes |
